# Supplementary material
Source: publisher site journal article supplement (https://www.dovepress.com/article/525610)

| **Supplementary Table 1: MR analysis results of gut microbiota and fibromyalgia (preliminary analysis cohort)** | | | | | | | | | | | |
| --- | --- | --- | --- | --- | --- | --- | --- | --- | --- | --- | --- |
| **Exposure** | **Outcome** | **Method** | **Nsnp** | **b** | **se** | **pval** | **lo_ci** | **up_ci** | **or** | **or_lci95** | **or_uci95** |
| Gut microbiota abundance (class Actinobacteria id.419) | Fibromyalgia | MR Egger | 15.000 | -0.162 | 0.408 | 0.698 | -0.962 | 0.639 | 0.851 | 0.382 | 1.894 |
| Gut microbiota abundance (class Actinobacteria id.419) | Fibromyalgia | Weighted median | 15.000 | 0.006 | 0.172 | 0.972 | -0.331 | 0.343 | 1.006 | 0.718 | 1.409 |
| Gut microbiota abundance (class Actinobacteria id.419) | Fibromyalgia | Inverse variance weighted | 15.000 | 0.058 | 0.138 | 0.675 | -0.213 | 0.329 | 1.060 | 0.808 | 1.389 |
| Gut microbiota abundance (class Alphaproteobacteria id.2379) | Fibromyalgia | MR Egger | 7.000 | -0.077 | 0.602 | 0.903 | -1.258 | 1.103 | 0.926 | 0.284 | 3.012 |
| Gut microbiota abundance (class Alphaproteobacteria id.2379) | Fibromyalgia | Weighted median | 7.000 | 0.228 | 0.194 | 0.240 | -0.152 | 0.608 | 1.256 | 0.859 | 1.837 |
| Gut microbiota abundance (class Alphaproteobacteria id.2379) | Fibromyalgia | Inverse variance weighted | 7.000 | 0.204 | 0.150 | 0.174 | -0.090 | 0.499 | 1.226 | 0.914 | 1.647 |
| Gut microbiota abundance (class Bacilli id.1673) | Fibromyalgia | MR Egger | 18.000 | -0.568 | 0.340 | 0.115 | -1.235 | 0.099 | 0.567 | 0.291 | 1.104 |
| Gut microbiota abundance (class Bacilli id.1673) | Fibromyalgia | Weighted median | 18.000 | -0.073 | 0.168 | 0.663 | -0.403 | 0.256 | 0.929 | 0.668 | 1.292 |
| Gut microbiota abundance (class Bacilli id.1673) | Fibromyalgia | Inverse variance weighted | 18.000 | -0.032 | 0.123 | 0.795 | -0.274 | 0.210 | 0.968 | 0.760 | 1.233 |
| Gut microbiota abundance (class Bacteroidia id.912) | Fibromyalgia | MR Egger | 13.000 | 0.124 | 0.304 | 0.692 | -0.473 | 0.720 | 1.132 | 0.623 | 2.055 |
| Gut microbiota abundance (class Bacteroidia id.912) | Fibromyalgia | Weighted median | 13.000 | 0.054 | 0.200 | 0.786 | -0.338 | 0.447 | 1.056 | 0.713 | 1.563 |
| Gut microbiota abundance (class Bacteroidia id.912) | Fibromyalgia | Inverse variance weighted | 13.000 | 0.033 | 0.147 | 0.819 | -0.254 | 0.321 | 1.034 | 0.776 | 1.378 |
| Gut microbiota abundance (class Betaproteobacteria id.2867) | Fibromyalgia | MR Egger | 10.000 | -0.004 | 0.532 | 0.994 | -1.048 | 1.040 | 0.996 | 0.351 | 2.828 |
| Gut microbiota abundance (class Betaproteobacteria id.2867) | Fibromyalgia | Weighted median | 10.000 | 0.129 | 0.222 | 0.561 | -0.307 | 0.565 | 1.138 | 0.736 | 1.760 |
| Gut microbiota abundance (class Betaproteobacteria id.2867) | Fibromyalgia | Inverse variance weighted | 10.000 | 0.006 | 0.168 | 0.973 | -0.323 | 0.335 | 1.006 | 0.724 | 1.398 |
| Gut microbiota abundance (class Clostridia id.1859) | Fibromyalgia | MR Egger | 12.000 | -0.181 | 0.445 | 0.692 | -1.053 | 0.691 | 0.834 | 0.349 | 1.995 |
| Gut microbiota abundance (class Clostridia id.1859) | Fibromyalgia | Weighted median | 12.000 | -0.073 | 0.201 | 0.717 | -0.468 | 0.321 | 0.930 | 0.627 | 1.379 |
| Gut microbiota abundance (class Clostridia id.1859) | Fibromyalgia | Inverse variance weighted | 12.000 | -0.091 | 0.158 | 0.567 | -0.401 | 0.219 | 0.913 | 0.670 | 1.245 |
| Gut microbiota abundance (class Coriobacteriia id.809) | Fibromyalgia | MR Egger | 14.000 | -0.478 | 0.624 | 0.458 | -1.700 | 0.744 | 0.620 | 0.183 | 2.105 |
| Gut microbiota abundance (class Coriobacteriia id.809) | Fibromyalgia | Weighted median | 14.000 | -0.054 | 0.198 | 0.785 | -0.442 | 0.334 | 0.947 | 0.643 | 1.397 |
| Gut microbiota abundance (class Coriobacteriia id.809) | Fibromyalgia | Inverse variance weighted | 14.000 | 0.021 | 0.150 | 0.892 | -0.274 | 0.315 | 1.021 | 0.760 | 1.371 |
| Gut microbiota abundance (class Deltaproteobacteria id.3087) | Fibromyalgia | MR Egger | 13.000 | 0.225 | 0.350 | 0.533 | -0.461 | 0.911 | 1.253 | 0.631 | 2.488 |
| Gut microbiota abundance (class Deltaproteobacteria id.3087) | Fibromyalgia | Weighted median | 13.000 | -0.072 | 0.193 | 0.710 | -0.449 | 0.306 | 0.931 | 0.638 | 1.358 |
| Gut microbiota abundance (class Deltaproteobacteria id.3087) | Fibromyalgia | Inverse variance weighted | 13.000 | -0.087 | 0.134 | 0.514 | -0.350 | 0.175 | 0.916 | 0.705 | 1.191 |
| Gut microbiota abundance (class Erysipelotrichia id.2147) | Fibromyalgia | MR Egger | 13.000 | -0.414 | 0.690 | 0.561 | -1.766 | 0.938 | 0.661 | 0.171 | 2.555 |
| Gut microbiota abundance (class Erysipelotrichia id.2147) | Fibromyalgia | Weighted median | 13.000 | 0.216 | 0.203 | 0.287 | -0.182 | 0.614 | 1.241 | 0.834 | 1.847 |
| Gut microbiota abundance (class Erysipelotrichia id.2147) | Fibromyalgia | Inverse variance weighted | 13.000 | 0.092 | 0.159 | 0.565 | -0.220 | 0.404 | 1.096 | 0.802 | 1.497 |
| Gut microbiota abundance (class Gammaproteobacteria id.3303) | Fibromyalgia | MR Egger | 6.000 | 0.304 | 0.780 | 0.717 | -1.224 | 1.832 | 1.355 | 0.294 | 6.244 |
| Gut microbiota abundance (class Gammaproteobacteria id.3303) | Fibromyalgia | Weighted median | 6.000 | 0.316 | 0.301 | 0.294 | -0.274 | 0.905 | 1.371 | 0.761 | 2.473 |
| Gut microbiota abundance (class Gammaproteobacteria id.3303) | Fibromyalgia | Inverse variance weighted | 6.000 | 0.193 | 0.231 | 0.404 | -0.260 | 0.646 | 1.213 | 0.771 | 1.909 |
| Gut microbiota abundance (class Lentisphaeria id.2250) | Fibromyalgia | MR Egger | 8.000 | -0.327 | 0.361 | 0.400 | -1.034 | 0.380 | 0.721 | 0.355 | 1.462 |
| Gut microbiota abundance (class Lentisphaeria id.2250) | Fibromyalgia | Weighted median | 8.000 | -0.025 | 0.127 | 0.844 | -0.274 | 0.224 | 0.975 | 0.760 | 1.252 |
| Gut microbiota abundance (class Lentisphaeria id.2250) | Fibromyalgia | Inverse variance weighted | 8.000 | -0.039 | 0.101 | 0.698 | -0.238 | 0.159 | 0.961 | 0.788 | 1.173 |
| Gut microbiota abundance (class Melainabacteria id.1589) | Fibromyalgia | MR Egger | 10.000 | 0.284 | 0.311 | 0.387 | -0.325 | 0.893 | 1.329 | 0.723 | 2.443 |
| Gut microbiota abundance (class Melainabacteria id.1589) | Fibromyalgia | Weighted median | 10.000 | 0.105 | 0.134 | 0.433 | -0.157 | 0.368 | 1.111 | 0.854 | 1.444 |
| Gut microbiota abundance (class Melainabacteria id.1589) | Fibromyalgia | Inverse variance weighted | 10.000 | 0.063 | 0.102 | 0.541 | -0.138 | 0.263 | 1.065 | 0.871 | 1.301 |
| Gut microbiota abundance (class Methanobacteria id.119) | Fibromyalgia | MR Egger | 10.000 | -0.125 | 0.368 | 0.742 | -0.846 | 0.595 | 0.882 | 0.429 | 1.814 |
| Gut microbiota abundance (class Methanobacteria id.119) | Fibromyalgia | Weighted median | 10.000 | -0.021 | 0.109 | 0.844 | -0.234 | 0.192 | 0.979 | 0.791 | 1.211 |
| Gut microbiota abundance (class Methanobacteria id.119) | Fibromyalgia | Inverse variance weighted | 10.000 | -0.020 | 0.084 | 0.817 | -0.185 | 0.146 | 0.981 | 0.831 | 1.157 |
| Gut microbiota abundance (class Mollicutes id.3920) | Fibromyalgia | MR Egger | 12.000 | -0.056 | 0.440 | 0.901 | -0.920 | 0.807 | 0.945 | 0.399 | 2.241 |
| Gut microbiota abundance (class Mollicutes id.3920) | Fibromyalgia | Weighted median | 12.000 | -0.106 | 0.180 | 0.558 | -0.460 | 0.248 | 0.900 | 0.632 | 1.281 |
| Gut microbiota abundance (class Mollicutes id.3920) | Fibromyalgia | Inverse variance weighted | 12.000 | -0.171 | 0.126 | 0.174 | -0.417 | 0.075 | 0.843 | 0.659 | 1.078 |
| Gut microbiota abundance (class Negativicutes id.2164) | Fibromyalgia | MR Egger | 12.000 | 0.385 | 0.726 | 0.607 | -1.038 | 1.809 | 1.470 | 0.354 | 6.102 |
| Gut microbiota abundance (class Negativicutes id.2164) | Fibromyalgia | Weighted median | 12.000 | 0.133 | 0.215 | 0.538 | -0.290 | 0.555 | 1.142 | 0.749 | 1.741 |
| Gut microbiota abundance (class Negativicutes id.2164) | Fibromyalgia | Inverse variance weighted | 12.000 | 0.163 | 0.202 | 0.420 | -0.232 | 0.558 | 1.177 | 0.793 | 1.746 |
| Gut microbiota abundance (class Verrucomicrobiae id.4029) | Fibromyalgia | MR Egger | 11.000 | 0.683 | 0.471 | 0.181 | -0.241 | 1.606 | 1.979 | 0.786 | 4.983 |
| Gut microbiota abundance (class Verrucomicrobiae id.4029) | Fibromyalgia | Weighted median | 11.000 | 0.223 | 0.188 | 0.234 | -0.145 | 0.591 | 1.250 | 0.865 | 1.805 |
| Gut microbiota abundance (class Verrucomicrobiae id.4029) | Fibromyalgia | Inverse variance weighted | 11.000 | 0.065 | 0.144 | 0.654 | -0.218 | 0.347 | 1.067 | 0.804 | 1.415 |
| Gut microbiota abundance (family Acidaminococcaceae id.2166) | Fibromyalgia | MR Egger | 7.000 | 0.029 | 0.465 | 0.952 | -0.882 | 0.941 | 1.030 | 0.414 | 2.562 |
| Gut microbiota abundance (family Acidaminococcaceae id.2166) | Fibromyalgia | Weighted median | 7.000 | 0.014 | 0.189 | 0.939 | -0.356 | 0.384 | 1.014 | 0.701 | 1.469 |
| Gut microbiota abundance (family Acidaminococcaceae id.2166) | Fibromyalgia | Inverse variance weighted | 7.000 | 0.025 | 0.154 | 0.869 | -0.276 | 0.327 | 1.026 | 0.759 | 1.387 |
| Gut microbiota abundance (family Actinomycetaceae id.421) | Fibromyalgia | MR Egger | 4.000 | 0.335 | 0.363 | 0.453 | -0.375 | 1.046 | 1.399 | 0.687 | 2.847 |
| Gut microbiota abundance (family Actinomycetaceae id.421) | Fibromyalgia | Weighted median | 4.000 | 0.039 | 0.196 | 0.843 | -0.345 | 0.423 | 1.040 | 0.708 | 1.526 |
| Gut microbiota abundance (family Actinomycetaceae id.421) | Fibromyalgia | Inverse variance weighted | 4.000 | -0.004 | 0.167 | 0.980 | -0.331 | 0.322 | 0.996 | 0.718 | 1.381 |
| Gut microbiota abundance (family Alcaligenaceae id.2875) | Fibromyalgia | MR Egger | 11.000 | 0.018 | 0.827 | 0.983 | -1.604 | 1.639 | 1.018 | 0.201 | 5.150 |
| Gut microbiota abundance (family Alcaligenaceae id.2875) | Fibromyalgia | Weighted median | 11.000 | -0.012 | 0.234 | 0.960 | -0.470 | 0.446 | 0.988 | 0.625 | 1.562 |
| Gut microbiota abundance (family Alcaligenaceae id.2875) | Fibromyalgia | Inverse variance weighted | 11.000 | -0.190 | 0.171 | 0.268 | -0.526 | 0.146 | 0.827 | 0.591 | 1.157 |
| Gut microbiota abundance (family Bacteroidaceae id.917) | Fibromyalgia | MR Egger | 9.000 | 0.199 | 1.028 | 0.852 | -1.816 | 2.214 | 1.220 | 0.163 | 9.150 |
| Gut microbiota abundance (family Bacteroidaceae id.917) | Fibromyalgia | Weighted median | 9.000 | -0.012 | 0.250 | 0.963 | -0.502 | 0.479 | 0.989 | 0.605 | 1.615 |
| Gut microbiota abundance (family Bacteroidaceae id.917) | Fibromyalgia | Inverse variance weighted | 9.000 | 0.107 | 0.186 | 0.565 | -0.257 | 0.470 | 1.113 | 0.773 | 1.601 |
| Gut microbiota abundance (family Bacteroidales S24 7group id.11173) | Fibromyalgia | MR Egger | 8.000 | 0.293 | 0.658 | 0.671 | -0.997 | 1.584 | 1.341 | 0.369 | 4.872 |
| Gut microbiota abundance (family Bacteroidales S24 7group id.11173) | Fibromyalgia | Weighted median | 8.000 | 0.110 | 0.176 | 0.531 | -0.234 | 0.455 | 1.116 | 0.791 | 1.576 |
| Gut microbiota abundance (family Bacteroidales S24 7group id.11173) | Fibromyalgia | Inverse variance weighted | 8.000 | 0.136 | 0.153 | 0.376 | -0.165 | 0.436 | 1.145 | 0.848 | 1.546 |
| Gut microbiota abundance (family Bifidobacteriaceae id.433) | Fibromyalgia | MR Egger | 11.000 | -0.110 | 0.438 | 0.806 | -0.968 | 0.747 | 0.895 | 0.380 | 2.111 |
| Gut microbiota abundance (family Bifidobacteriaceae id.433) | Fibromyalgia | Weighted median | 11.000 | -0.165 | 0.173 | 0.341 | -0.503 | 0.174 | 0.848 | 0.605 | 1.190 |
| Gut microbiota abundance (family Bifidobacteriaceae id.433) | Fibromyalgia | Inverse variance weighted | 11.000 | -0.145 | 0.134 | 0.280 | -0.407 | 0.118 | 0.865 | 0.665 | 1.125 |
| Gut microbiota abundance (family Clostridiaceae1 id.1869) | Fibromyalgia | MR Egger | 10.000 | 0.287 | 0.442 | 0.534 | -0.578 | 1.153 | 1.333 | 0.561 | 3.167 |
| Gut microbiota abundance (family Clostridiaceae1 id.1869) | Fibromyalgia | Weighted median | 10.000 | -0.007 | 0.187 | 0.971 | -0.374 | 0.360 | 0.993 | 0.688 | 1.433 |
| Gut microbiota abundance (family Clostridiaceae1 id.1869) | Fibromyalgia | Inverse variance weighted | 10.000 | 0.100 | 0.151 | 0.511 | -0.197 | 0.396 | 1.105 | 0.821 | 1.486 |
| Gut microbiota abundance (family Clostridiales vadin BB60 group id.11286) | Fibromyalgia | MR Egger | 15.000 | -0.447 | 0.290 | 0.147 | -1.017 | 0.122 | 0.639 | 0.362 | 1.129 |
| Gut microbiota abundance (family Clostridiales vadin BB60 group id.11286) | Fibromyalgia | Weighted median | 15.000 | 0.150 | 0.151 | 0.320 | -0.146 | 0.446 | 1.162 | 0.864 | 1.562 |
| Gut microbiota abundance (family Clostridiales vadin BB60 group id.11286) | Fibromyalgia | Inverse variance weighted | 15.000 | 0.132 | 0.106 | 0.216 | -0.077 | 0.340 | 1.141 | 0.926 | 1.405 |
| Gut microbiota abundance (family Coriobacteriaceae id.811) | Fibromyalgia | MR Egger | 14.000 | -0.478 | 0.624 | 0.458 | -1.700 | 0.744 | 0.620 | 0.183 | 2.105 |
| Gut microbiota abundance (family Coriobacteriaceae id.811) | Fibromyalgia | Weighted median | 14.000 | -0.054 | 0.207 | 0.794 | -0.460 | 0.352 | 0.947 | 0.631 | 1.421 |
| Gut microbiota abundance (family Coriobacteriaceae id.811) | Fibromyalgia | Inverse variance weighted | 14.000 | 0.021 | 0.150 | 0.892 | -0.274 | 0.315 | 1.021 | 0.760 | 1.371 |
| Gut microbiota abundance (family Defluviitaleaceae id.1924) | Fibromyalgia | MR Egger | 11.000 | 0.416 | 0.402 | 0.328 | -0.372 | 1.205 | 1.517 | 0.689 | 3.337 |
| Gut microbiota abundance (family Defluviitaleaceae id.1924) | Fibromyalgia | Weighted median | 11.000 | 0.114 | 0.157 | 0.470 | -0.194 | 0.421 | 1.120 | 0.823 | 1.524 |
| Gut microbiota abundance (family Defluviitaleaceae id.1924) | Fibromyalgia | Inverse variance weighted | 11.000 | 0.027 | 0.118 | 0.820 | -0.204 | 0.258 | 1.027 | 0.815 | 1.294 |
| Gut microbiota abundance (family Desulfovibrionaceae id.3169) | Fibromyalgia | MR Egger | 10.000 | 0.205 | 0.348 | 0.572 | -0.477 | 0.886 | 1.227 | 0.621 | 2.426 |
| Gut microbiota abundance (family Desulfovibrionaceae id.3169) | Fibromyalgia | Weighted median | 10.000 | 0.104 | 0.210 | 0.619 | -0.307 | 0.516 | 1.110 | 0.736 | 1.675 |
| Gut microbiota abundance (family Desulfovibrionaceae id.3169) | Fibromyalgia | Inverse variance weighted | 10.000 | -0.053 | 0.145 | 0.717 | -0.337 | 0.232 | 0.949 | 0.714 | 1.261 |
| Gut microbiota abundance (family Enterobacteriaceae id.3469) | Fibromyalgia | MR Egger | 7.000 | -0.615 | 1.141 | 0.613 | -2.851 | 1.622 | 0.541 | 0.058 | 5.063 |
| Gut microbiota abundance (family Enterobacteriaceae id.3469) | Fibromyalgia | Weighted median | 7.000 | -0.317 | 0.242 | 0.189 | -0.791 | 0.156 | 0.728 | 0.453 | 1.169 |
| Gut microbiota abundance (family Enterobacteriaceae id.3469) | Fibromyalgia | Inverse variance weighted | 7.000 | -0.389 | 0.191 | 0.041 | -0.763 | -0.015 | 0.677 | 0.466 | 0.985 |
| Gut microbiota abundance (family Erysipelotrichaceae id.2149) | Fibromyalgia | MR Egger | 13.000 | -0.414 | 0.690 | 0.561 | -1.766 | 0.938 | 0.661 | 0.171 | 2.555 |
| Gut microbiota abundance (family Erysipelotrichaceae id.2149) | Fibromyalgia | Weighted median | 13.000 | 0.216 | 0.213 | 0.311 | -0.201 | 0.633 | 1.241 | 0.818 | 1.883 |
| Gut microbiota abundance (family Erysipelotrichaceae id.2149) | Fibromyalgia | Inverse variance weighted | 13.000 | 0.092 | 0.159 | 0.565 | -0.220 | 0.404 | 1.096 | 0.802 | 1.497 |
| Gut microbiota abundance (family Family XI id.1936) | Fibromyalgia | MR Egger | 8.000 | 1.013 | 0.519 | 0.099 | -0.004 | 2.029 | 2.753 | 0.996 | 7.608 |
| Gut microbiota abundance (family Family XI id.1936) | Fibromyalgia | Weighted median | 8.000 | -0.013 | 0.110 | 0.906 | -0.228 | 0.202 | 0.987 | 0.796 | 1.224 |
| Gut microbiota abundance (family Family XI id.1936) | Fibromyalgia | Inverse variance weighted | 8.000 | -0.050 | 0.088 | 0.568 | -0.221 | 0.122 | 0.951 | 0.801 | 1.129 |
| Gut microbiota abundance (family Family XIII id.1957) | Fibromyalgia | MR Egger | 10.000 | -0.419 | 0.577 | 0.489 | -1.549 | 0.712 | 0.658 | 0.213 | 2.037 |
| Gut microbiota abundance (family Family XIII id.1957) | Fibromyalgia | Weighted median | 10.000 | -0.307 | 0.211 | 0.146 | -0.720 | 0.107 | 0.736 | 0.487 | 1.113 |
| Gut microbiota abundance (family Family XIII id.1957) | Fibromyalgia | Inverse variance weighted | 10.000 | -0.135 | 0.173 | 0.436 | -0.473 | 0.204 | 0.874 | 0.623 | 1.226 |
| Gut microbiota abundance (family Lachnospiraceae id.1987) | Fibromyalgia | MR Egger | 16.000 | 1.166 | 0.511 | 0.039 | 0.164 | 2.168 | 3.209 | 1.178 | 8.745 |
| Gut microbiota abundance (family Lachnospiraceae id.1987) | Fibromyalgia | Weighted median | 16.000 | -0.144 | 0.214 | 0.501 | -0.563 | 0.275 | 0.866 | 0.569 | 1.317 |
| Gut microbiota abundance (family Lachnospiraceae id.1987) | Fibromyalgia | Inverse variance weighted | 16.000 | -0.307 | 0.182 | 0.091 | -0.663 | 0.049 | 0.736 | 0.515 | 1.051 |
| Gut microbiota abundance (family Lactobacillaceae id.1836) | Fibromyalgia | MR Egger | 8.000 | -0.260 | 0.275 | 0.381 | -0.799 | 0.279 | 0.771 | 0.450 | 1.322 |
| Gut microbiota abundance (family Lactobacillaceae id.1836) | Fibromyalgia | Weighted median | 8.000 | 0.192 | 0.135 | 0.153 | -0.071 | 0.456 | 1.212 | 0.931 | 1.578 |
| Gut microbiota abundance (family Lactobacillaceae id.1836) | Fibromyalgia | Inverse variance weighted | 8.000 | 0.085 | 0.110 | 0.442 | -0.131 | 0.301 | 1.088 | 0.877 | 1.351 |
| Gut microbiota abundance (family Methanobacteriaceae id.121) | Fibromyalgia | MR Egger | 10.000 | -0.125 | 0.368 | 0.742 | -0.846 | 0.595 | 0.882 | 0.429 | 1.814 |
| Gut microbiota abundance (family Methanobacteriaceae id.121) | Fibromyalgia | Weighted median | 10.000 | -0.021 | 0.112 | 0.849 | -0.241 | 0.198 | 0.979 | 0.786 | 1.219 |
| Gut microbiota abundance (family Methanobacteriaceae id.121) | Fibromyalgia | Inverse variance weighted | 10.000 | -0.020 | 0.084 | 0.817 | -0.185 | 0.146 | 0.981 | 0.831 | 1.157 |
| Gut microbiota abundance (family Oxalobacteraceae id.2966) | Fibromyalgia | MR Egger | 14.000 | -0.447 | 0.317 | 0.183 | -1.068 | 0.173 | 0.639 | 0.344 | 1.189 |
| Gut microbiota abundance (family Oxalobacteraceae id.2966) | Fibromyalgia | Weighted median | 14.000 | -0.072 | 0.112 | 0.517 | -0.291 | 0.146 | 0.930 | 0.748 | 1.158 |
| Gut microbiota abundance (family Oxalobacteraceae id.2966) | Fibromyalgia | Inverse variance weighted | 14.000 | -0.068 | 0.084 | 0.414 | -0.232 | 0.096 | 0.934 | 0.793 | 1.100 |
| Gut microbiota abundance (family Pasteurellaceae id.3689) | Fibromyalgia | MR Egger | 14.000 | 0.046 | 0.253 | 0.858 | -0.450 | 0.543 | 1.048 | 0.637 | 1.721 |
| Gut microbiota abundance (family Pasteurellaceae id.3689) | Fibromyalgia | Weighted median | 14.000 | 0.048 | 0.135 | 0.724 | -0.218 | 0.313 | 1.049 | 0.804 | 1.368 |
| Gut microbiota abundance (family Pasteurellaceae id.3689) | Fibromyalgia | Inverse variance weighted | 14.000 | -0.029 | 0.113 | 0.799 | -0.249 | 0.192 | 0.972 | 0.779 | 1.211 |
| Gut microbiota abundance (family Peptococcaceae id.2024) | Fibromyalgia | MR Egger | 9.000 | 0.040 | 0.369 | 0.916 | -0.683 | 0.763 | 1.041 | 0.505 | 2.145 |
| Gut microbiota abundance (family Peptococcaceae id.2024) | Fibromyalgia | Weighted median | 9.000 | 0.144 | 0.170 | 0.398 | -0.190 | 0.478 | 1.155 | 0.827 | 1.613 |
| Gut microbiota abundance (family Peptococcaceae id.2024) | Fibromyalgia | Inverse variance weighted | 9.000 | 0.208 | 0.132 | 0.117 | -0.052 | 0.468 | 1.231 | 0.950 | 1.596 |
| Gut microbiota abundance (family Peptostreptococcaceae id.2042) | Fibromyalgia | MR Egger | 13.000 | 0.108 | 0.284 | 0.711 | -0.448 | 0.664 | 1.114 | 0.639 | 1.943 |
| Gut microbiota abundance (family Peptostreptococcaceae id.2042) | Fibromyalgia | Weighted median | 13.000 | 0.023 | 0.172 | 0.894 | -0.314 | 0.360 | 1.023 | 0.730 | 1.434 |
| Gut microbiota abundance (family Peptostreptococcaceae id.2042) | Fibromyalgia | Inverse variance weighted | 13.000 | 0.000 | 0.125 | 0.998 | -0.244 | 0.245 | 1.000 | 0.784 | 1.277 |
| Gut microbiota abundance (family Porphyromonadaceae id.943) | Fibromyalgia | MR Egger | 9.000 | 0.992 | 0.879 | 0.297 | -0.732 | 2.716 | 2.696 | 0.481 | 15.112 |
| Gut microbiota abundance (family Porphyromonadaceae id.943) | Fibromyalgia | Weighted median | 9.000 | -0.025 | 0.260 | 0.922 | -0.536 | 0.485 | 0.975 | 0.585 | 1.624 |
| Gut microbiota abundance (family Porphyromonadaceae id.943) | Fibromyalgia | Inverse variance weighted | 9.000 | 0.014 | 0.198 | 0.945 | -0.375 | 0.402 | 1.014 | 0.688 | 1.495 |
| Gut microbiota abundance (family Prevotellaceae id.960) | Fibromyalgia | MR Egger | 16.000 | -1.021 | 0.455 | 0.042 | -1.914 | -0.129 | 0.360 | 0.148 | 0.879 |
| Gut microbiota abundance (family Prevotellaceae id.960) | Fibromyalgia | Weighted median | 16.000 | 0.013 | 0.181 | 0.942 | -0.341 | 0.367 | 1.013 | 0.711 | 1.443 |
| Gut microbiota abundance (family Prevotellaceae id.960) | Fibromyalgia | Inverse variance weighted | 16.000 | 0.020 | 0.133 | 0.879 | -0.240 | 0.281 | 1.021 | 0.786 | 1.324 |
| Gut microbiota abundance (family Rhodospirillaceae id.2717) | Fibromyalgia | MR Egger | 15.000 | 0.127 | 0.404 | 0.758 | -0.664 | 0.918 | 1.135 | 0.515 | 2.505 |
| Gut microbiota abundance (family Rhodospirillaceae id.2717) | Fibromyalgia | Weighted median | 15.000 | 0.058 | 0.138 | 0.673 | -0.213 | 0.329 | 1.060 | 0.808 | 1.390 |
| Gut microbiota abundance (family Rhodospirillaceae id.2717) | Fibromyalgia | Inverse variance weighted | 15.000 | 0.091 | 0.096 | 0.340 | -0.096 | 0.279 | 1.096 | 0.908 | 1.322 |
| Gut microbiota abundance (family Rikenellaceae id.967) | Fibromyalgia | MR Egger | 16.000 | -0.150 | 0.407 | 0.717 | -0.947 | 0.646 | 0.860 | 0.388 | 1.909 |
| Gut microbiota abundance (family Rikenellaceae id.967) | Fibromyalgia | Weighted median | 16.000 | 0.179 | 0.177 | 0.312 | -0.167 | 0.525 | 1.196 | 0.846 | 1.690 |
| Gut microbiota abundance (family Rikenellaceae id.967) | Fibromyalgia | Inverse variance weighted | 16.000 | 0.158 | 0.133 | 0.232 | -0.101 | 0.418 | 1.172 | 0.904 | 1.519 |
| Gut microbiota abundance (family Ruminococcaceae id.2050) | Fibromyalgia | MR Egger | 10.000 | -0.356 | 0.332 | 0.316 | -1.007 | 0.296 | 0.701 | 0.365 | 1.344 |
| Gut microbiota abundance (family Ruminococcaceae id.2050) | Fibromyalgia | Weighted median | 10.000 | -0.147 | 0.206 | 0.475 | -0.550 | 0.256 | 0.863 | 0.577 | 1.292 |
| Gut microbiota abundance (family Ruminococcaceae id.2050) | Fibromyalgia | Inverse variance weighted | 10.000 | -0.028 | 0.153 | 0.857 | -0.329 | 0.273 | 0.973 | 0.720 | 1.314 |
| Gut microbiota abundance (family Streptococcaceae id.1850) | Fibromyalgia | MR Egger | 14.000 | -0.199 | 0.581 | 0.738 | -1.337 | 0.940 | 0.820 | 0.263 | 2.559 |
| Gut microbiota abundance (family Streptococcaceae id.1850) | Fibromyalgia | Weighted median | 14.000 | 0.039 | 0.197 | 0.843 | -0.346 | 0.424 | 1.040 | 0.707 | 1.529 |
| Gut microbiota abundance (family Streptococcaceae id.1850) | Fibromyalgia | Inverse variance weighted | 14.000 | -0.012 | 0.143 | 0.934 | -0.292 | 0.268 | 0.988 | 0.747 | 1.308 |
| Gut microbiota abundance (family Veillonellaceae id.2172) | Fibromyalgia | MR Egger | 19.000 | -0.017 | 0.217 | 0.940 | -0.443 | 0.410 | 0.984 | 0.642 | 1.506 |
| Gut microbiota abundance (family Veillonellaceae id.2172) | Fibromyalgia | Weighted median | 19.000 | -0.026 | 0.143 | 0.854 | -0.306 | 0.254 | 0.974 | 0.736 | 1.289 |
| Gut microbiota abundance (family Veillonellaceae id.2172) | Fibromyalgia | Inverse variance weighted | 19.000 | 0.004 | 0.107 | 0.970 | -0.205 | 0.213 | 1.004 | 0.815 | 1.238 |
| Gut microbiota abundance (family Verrucomicrobiaceae id.4036) | Fibromyalgia | MR Egger | 11.000 | 0.682 | 0.471 | 0.182 | -0.242 | 1.605 | 1.978 | 0.785 | 4.980 |
| Gut microbiota abundance (family Verrucomicrobiaceae id.4036) | Fibromyalgia | Weighted median | 11.000 | 0.223 | 0.183 | 0.222 | -0.135 | 0.581 | 1.250 | 0.874 | 1.788 |
| Gut microbiota abundance (family Verrucomicrobiaceae id.4036) | Fibromyalgia | Inverse variance weighted | 11.000 | 0.065 | 0.144 | 0.654 | -0.218 | 0.347 | 1.067 | 0.804 | 1.415 |
| Gut microbiota abundance (family Victivallaceae id.2255) | Fibromyalgia | MR Egger | 12.000 | -0.770 | 0.455 | 0.121 | -1.661 | 0.121 | 0.463 | 0.190 | 1.129 |
| Gut microbiota abundance (family Victivallaceae id.2255) | Fibromyalgia | Weighted median | 12.000 | -0.239 | 0.109 | 0.029 | -0.453 | -0.025 | 0.787 | 0.635 | 0.975 |
| Gut microbiota abundance (family Victivallaceae id.2255) | Fibromyalgia | Inverse variance weighted | 12.000 | -0.078 | 0.101 | 0.441 | -0.277 | 0.121 | 0.925 | 0.758 | 1.128 |
| Gut microbiota abundance (genus Actinomyces id.423) | Fibromyalgia | MR Egger | 7.000 | 0.267 | 0.616 | 0.683 | -0.940 | 1.473 | 1.306 | 0.391 | 4.364 |
| Gut microbiota abundance (genus Actinomyces id.423) | Fibromyalgia | Weighted median | 7.000 | -0.146 | 0.187 | 0.435 | -0.512 | 0.220 | 0.864 | 0.599 | 1.246 |
| Gut microbiota abundance (genus Actinomyces id.423) | Fibromyalgia | Inverse variance weighted | 7.000 | -0.060 | 0.239 | 0.803 | -0.527 | 0.408 | 0.942 | 0.590 | 1.504 |
| Gut microbiota abundance (genus Adlercreutzia id.812) | Fibromyalgia | MR Egger | 8.000 | 0.483 | 0.810 | 0.573 | -1.104 | 2.069 | 1.621 | 0.332 | 7.920 |
| Gut microbiota abundance (genus Adlercreutzia id.812) | Fibromyalgia | Weighted median | 8.000 | -0.199 | 0.198 | 0.314 | -0.588 | 0.189 | 0.819 | 0.556 | 1.208 |
| Gut microbiota abundance (genus Adlercreutzia id.812) | Fibromyalgia | Inverse variance weighted | 8.000 | -0.066 | 0.174 | 0.705 | -0.407 | 0.275 | 0.936 | 0.665 | 1.317 |
| Gut microbiota abundance (genus Akkermansia id.4037) | Fibromyalgia | MR Egger | 11.000 | 0.681 | 0.471 | 0.182 | -0.242 | 1.604 | 1.976 | 0.785 | 4.972 |
| Gut microbiota abundance (genus Akkermansia id.4037) | Fibromyalgia | Weighted median | 11.000 | 0.222 | 0.183 | 0.226 | -0.137 | 0.581 | 1.249 | 0.872 | 1.788 |
| Gut microbiota abundance (genus Akkermansia id.4037) | Fibromyalgia | Inverse variance weighted | 11.000 | 0.065 | 0.144 | 0.654 | -0.218 | 0.347 | 1.067 | 0.804 | 1.415 |
| Gut microbiota abundance (genus Alistipes id.968) | Fibromyalgia | MR Egger | 13.000 | -0.632 | 0.795 | 0.443 | -2.190 | 0.926 | 0.531 | 0.112 | 2.524 |
| Gut microbiota abundance (genus Alistipes id.968) | Fibromyalgia | Weighted median | 13.000 | 0.134 | 0.222 | 0.545 | -0.301 | 0.570 | 1.144 | 0.740 | 1.768 |
| Gut microbiota abundance (genus Alistipes id.968) | Fibromyalgia | Inverse variance weighted | 13.000 | 0.156 | 0.165 | 0.346 | -0.168 | 0.479 | 1.168 | 0.845 | 1.615 |
| Gut microbiota abundance (genus Allisonella id.2174) | Fibromyalgia | MR Egger | 8.000 | 0.606 | 0.953 | 0.548 | -1.262 | 2.473 | 1.833 | 0.283 | 11.863 |
| Gut microbiota abundance (genus Allisonella id.2174) | Fibromyalgia | Weighted median | 8.000 | 0.053 | 0.122 | 0.666 | -0.187 | 0.292 | 1.054 | 0.830 | 1.339 |
| Gut microbiota abundance (genus Allisonella id.2174) | Fibromyalgia | Inverse variance weighted | 8.000 | 0.016 | 0.135 | 0.907 | -0.248 | 0.280 | 1.016 | 0.780 | 1.323 |
| Gut microbiota abundance (genus Alloprevotella id.961) | Fibromyalgia | MR Egger | 5.000 | -0.737 | 1.474 | 0.651 | -3.626 | 2.151 | 0.478 | 0.027 | 8.595 |
| Gut microbiota abundance (genus Alloprevotella id.961) | Fibromyalgia | Weighted median | 5.000 | 0.106 | 0.146 | 0.468 | -0.180 | 0.392 | 1.112 | 0.835 | 1.480 |
| Gut microbiota abundance (genus Alloprevotella id.961) | Fibromyalgia | Inverse variance weighted | 5.000 | 0.156 | 0.156 | 0.317 | -0.150 | 0.461 | 1.169 | 0.861 | 1.586 |
| Gut microbiota abundance (genus Anaerofilum id.2053) | Fibromyalgia | MR Egger | 10.000 | -0.063 | 0.510 | 0.905 | -1.062 | 0.936 | 0.939 | 0.346 | 2.550 |
| Gut microbiota abundance (genus Anaerofilum id.2053) | Fibromyalgia | Weighted median | 10.000 | 0.116 | 0.124 | 0.351 | -0.127 | 0.359 | 1.123 | 0.880 | 1.432 |
| Gut microbiota abundance (genus Anaerofilum id.2053) | Fibromyalgia | Inverse variance weighted | 10.000 | 0.113 | 0.094 | 0.228 | -0.071 | 0.297 | 1.120 | 0.932 | 1.346 |
| Gut microbiota abundance (genus Anaerostipes id.1991) | Fibromyalgia | MR Egger | 13.000 | -1.418 | 0.558 | 0.027 | -2.511 | -0.324 | 0.242 | 0.081 | 0.723 |
| Gut microbiota abundance (genus Anaerostipes id.1991) | Fibromyalgia | Weighted median | 13.000 | -0.206 | 0.215 | 0.339 | -0.628 | 0.216 | 0.814 | 0.534 | 1.241 |
| Gut microbiota abundance (genus Anaerostipes id.1991) | Fibromyalgia | Inverse variance weighted | 13.000 | -0.210 | 0.156 | 0.178 | -0.516 | 0.096 | 0.811 | 0.597 | 1.100 |
| Gut microbiota abundance (genus Anaerotruncus id.2054) | Fibromyalgia | MR Egger | 13.000 | -0.123 | 0.431 | 0.780 | -0.968 | 0.721 | 0.884 | 0.380 | 2.056 |
| Gut microbiota abundance (genus Anaerotruncus id.2054) | Fibromyalgia | Weighted median | 13.000 | 0.203 | 0.199 | 0.307 | -0.187 | 0.593 | 1.225 | 0.830 | 1.809 |
| Gut microbiota abundance (genus Anaerotruncus id.2054) | Fibromyalgia | Inverse variance weighted | 13.000 | 0.179 | 0.148 | 0.227 | -0.111 | 0.469 | 1.196 | 0.895 | 1.598 |
| Gut microbiota abundance (genus Bacteroides id.918) | Fibromyalgia | MR Egger | 9.000 | 0.199 | 1.028 | 0.852 | -1.816 | 2.214 | 1.220 | 0.163 | 9.150 |
| Gut microbiota abundance (genus Bacteroides id.918) | Fibromyalgia | Weighted median | 9.000 | -0.012 | 0.244 | 0.962 | -0.489 | 0.466 | 0.989 | 0.613 | 1.594 |
| Gut microbiota abundance (genus Bacteroides id.918) | Fibromyalgia | Inverse variance weighted | 9.000 | 0.107 | 0.186 | 0.565 | -0.257 | 0.470 | 1.113 | 0.773 | 1.601 |
| Gut microbiota abundance (genus Barnesiella id.944) | Fibromyalgia | MR Egger | 13.000 | 0.753 | 0.573 | 0.215 | -0.370 | 1.875 | 2.123 | 0.691 | 6.522 |
| Gut microbiota abundance (genus Barnesiella id.944) | Fibromyalgia | Weighted median | 13.000 | 0.237 | 0.185 | 0.200 | -0.125 | 0.599 | 1.267 | 0.882 | 1.820 |
| Gut microbiota abundance (genus Barnesiella id.944) | Fibromyalgia | Inverse variance weighted | 13.000 | 0.164 | 0.142 | 0.248 | -0.114 | 0.441 | 1.178 | 0.892 | 1.554 |
| Gut microbiota abundance (genus Bifidobacterium id.436) | Fibromyalgia | MR Egger | 12.000 | 0.024 | 0.298 | 0.939 | -0.561 | 0.608 | 1.024 | 0.571 | 1.837 |
| Gut microbiota abundance (genus Bifidobacterium id.436) | Fibromyalgia | Weighted median | 12.000 | -0.026 | 0.173 | 0.881 | -0.365 | 0.313 | 0.974 | 0.694 | 1.367 |
| Gut microbiota abundance (genus Bifidobacterium id.436) | Fibromyalgia | Inverse variance weighted | 12.000 | -0.003 | 0.122 | 0.981 | -0.242 | 0.237 | 0.997 | 0.785 | 1.267 |
| Gut microbiota abundance (genus Bilophila id.3170) | Fibromyalgia | MR Egger | 13.000 | -0.121 | 0.677 | 0.861 | -1.449 | 1.206 | 0.886 | 0.235 | 3.341 |
| Gut microbiota abundance (genus Bilophila id.3170) | Fibromyalgia | Weighted median | 13.000 | 0.081 | 0.183 | 0.656 | -0.277 | 0.439 | 1.085 | 0.758 | 1.552 |
| Gut microbiota abundance (genus Bilophila id.3170) | Fibromyalgia | Inverse variance weighted | 13.000 | 0.029 | 0.138 | 0.831 | -0.240 | 0.299 | 1.030 | 0.786 | 1.349 |
| Gut microbiota abundance (genus Blautia id.1992) | Fibromyalgia | Inverse variance weighted | 2.000 | -0.056 | 0.528 | 0.915 | -1.091 | 0.978 | 0.945 | 0.336 | 2.658 |
| Gut microbiota abundance (genus Butyricicoccus id.2055) | Fibromyalgia | MR Egger | 8.000 | -0.541 | 0.329 | 0.151 | -1.185 | 0.104 | 0.582 | 0.306 | 1.109 |
| Gut microbiota abundance (genus Butyricicoccus id.2055) | Fibromyalgia | Weighted median | 8.000 | -0.433 | 0.222 | 0.051 | -0.868 | 0.002 | 0.649 | 0.420 | 1.002 |
| Gut microbiota abundance (genus Butyricicoccus id.2055) | Fibromyalgia | Inverse variance weighted | 8.000 | -0.382 | 0.168 | 0.023 | -0.711 | -0.052 | 0.683 | 0.491 | 0.949 |
| Gut microbiota abundance (genus Butyricimonas id.945) | Fibromyalgia | MR Egger | 13.000 | 0.285 | 0.452 | 0.541 | -0.601 | 1.172 | 1.330 | 0.548 | 3.228 |
| Gut microbiota abundance (genus Butyricimonas id.945) | Fibromyalgia | Weighted median | 13.000 | 0.274 | 0.169 | 0.105 | -0.057 | 0.606 | 1.316 | 0.944 | 1.833 |
| Gut microbiota abundance (genus Butyricimonas id.945) | Fibromyalgia | Inverse variance weighted | 13.000 | 0.180 | 0.127 | 0.158 | -0.070 | 0.430 | 1.197 | 0.933 | 1.537 |
| Gut microbiota abundance (genus Butyrivibrio id.1993) | Fibromyalgia | MR Egger | 15.000 | -0.383 | 0.301 | 0.226 | -0.974 | 0.207 | 0.682 | 0.377 | 1.230 |
| Gut microbiota abundance (genus Butyrivibrio id.1993) | Fibromyalgia | Weighted median | 15.000 | -0.143 | 0.092 | 0.121 | -0.323 | 0.038 | 0.867 | 0.724 | 1.039 |
| Gut microbiota abundance (genus Butyrivibrio id.1993) | Fibromyalgia | Inverse variance weighted | 15.000 | -0.047 | 0.071 | 0.504 | -0.186 | 0.092 | 0.954 | 0.830 | 1.096 |
| Gut microbiota abundance (genus Candidatus Soleaferrea id.11350) | Fibromyalgia | MR Egger | 10.000 | -1.048 | 0.499 | 0.069 | -2.025 | -0.071 | 0.351 | 0.132 | 0.931 |
| Gut microbiota abundance (genus Candidatus Soleaferrea id.11350) | Fibromyalgia | Weighted median | 10.000 | -0.236 | 0.138 | 0.088 | -0.507 | 0.035 | 0.790 | 0.603 | 1.036 |
| Gut microbiota abundance (genus Candidatus Soleaferrea id.11350) | Fibromyalgia | Inverse variance weighted | 10.000 | -0.174 | 0.102 | 0.088 | -0.374 | 0.026 | 0.840 | 0.688 | 1.026 |
| Gut microbiota abundance (genus Catenibacterium id.2153) | Fibromyalgia | MR Egger | 4.000 | 1.503 | 1.539 | 0.432 | -1.513 | 4.519 | 4.496 | 0.220 | 91.752 |
| Gut microbiota abundance (genus Catenibacterium id.2153) | Fibromyalgia | Weighted median | 4.000 | -0.163 | 0.147 | 0.267 | -0.450 | 0.125 | 0.850 | 0.638 | 1.133 |
| Gut microbiota abundance (genus Catenibacterium id.2153) | Fibromyalgia | Inverse variance weighted | 4.000 | -0.187 | 0.123 | 0.128 | -0.427 | 0.054 | 0.830 | 0.652 | 1.055 |
| Gut microbiota abundance (genus Christensenellaceae R 7group id.11283) | Fibromyalgia | MR Egger | 9.000 | 0.306 | 0.630 | 0.643 | -0.930 | 1.541 | 1.357 | 0.395 | 4.669 |
| Gut microbiota abundance (genus Christensenellaceae R 7group id.11283) | Fibromyalgia | Weighted median | 9.000 | -0.062 | 0.242 | 0.798 | -0.537 | 0.413 | 0.940 | 0.585 | 1.511 |
| Gut microbiota abundance (genus Christensenellaceae R 7group id.11283) | Fibromyalgia | Inverse variance weighted | 9.000 | -0.152 | 0.187 | 0.416 | -0.519 | 0.214 | 0.859 | 0.595 | 1.239 |
| Gut microbiota abundance (genus Clostridium innocuum group id.14397) | Fibromyalgia | MR Egger | 8.000 | 0.676 | 0.457 | 0.190 | -0.221 | 1.572 | 1.965 | 0.802 | 4.815 |
| Gut microbiota abundance (genus Clostridium innocuum group id.14397) | Fibromyalgia | Weighted median | 8.000 | -0.106 | 0.123 | 0.389 | -0.347 | 0.135 | 0.899 | 0.707 | 1.145 |
| Gut microbiota abundance (genus Clostridium innocuum group id.14397) | Fibromyalgia | Inverse variance weighted | 8.000 | -0.025 | 0.091 | 0.781 | -0.204 | 0.153 | 0.975 | 0.816 | 1.165 |
| Gut microbiota abundance (genus Clostridium sensustricto1 id.1873) | Fibromyalgia | MR Egger | 7.000 | -0.249 | 0.407 | 0.567 | -1.047 | 0.549 | 0.779 | 0.351 | 1.731 |
| Gut microbiota abundance (genus Clostridium sensustricto1 id.1873) | Fibromyalgia | Weighted median | 7.000 | -0.008 | 0.195 | 0.965 | -0.390 | 0.373 | 0.992 | 0.677 | 1.452 |
| Gut microbiota abundance (genus Clostridium sensustricto1 id.1873) | Fibromyalgia | Inverse variance weighted | 7.000 | 0.017 | 0.158 | 0.913 | -0.293 | 0.327 | 1.017 | 0.746 | 1.387 |
| Gut microbiota abundance (genus Collinsella id.815) | Fibromyalgia | MR Egger | 9.000 | 0.325 | 0.670 | 0.643 | -0.988 | 1.637 | 1.383 | 0.372 | 5.140 |
| Gut microbiota abundance (genus Collinsella id.815) | Fibromyalgia | Weighted median | 9.000 | -0.123 | 0.231 | 0.595 | -0.575 | 0.329 | 0.885 | 0.563 | 1.390 |
| Gut microbiota abundance (genus Collinsella id.815) | Fibromyalgia | Inverse variance weighted | 9.000 | -0.147 | 0.179 | 0.412 | -0.498 | 0.204 | 0.863 | 0.607 | 1.226 |
| Gut microbiota abundance (genus Coprobacter id.949) | Fibromyalgia | MR Egger | 11.000 | -0.695 | 0.476 | 0.178 | -1.628 | 0.238 | 0.499 | 0.196 | 1.269 |
| Gut microbiota abundance (genus Coprobacter id.949) | Fibromyalgia | Weighted median | 11.000 | -0.007 | 0.150 | 0.960 | -0.301 | 0.286 | 0.993 | 0.740 | 1.331 |
| Gut microbiota abundance (genus Coprobacter id.949) | Fibromyalgia | Inverse variance weighted | 11.000 | -0.026 | 0.128 | 0.837 | -0.277 | 0.224 | 0.974 | 0.758 | 1.252 |
| Gut microbiota abundance (genus Coprococcus1 id.11301) | Fibromyalgia | MR Egger | 11.000 | -0.838 | 0.373 | 0.051 | -1.569 | -0.106 | 0.433 | 0.208 | 0.899 |
| Gut microbiota abundance (genus Coprococcus1 id.11301) | Fibromyalgia | Weighted median | 11.000 | -0.365 | 0.217 | 0.092 | -0.791 | 0.060 | 0.694 | 0.454 | 1.062 |
| Gut microbiota abundance (genus Coprococcus1 id.11301) | Fibromyalgia | Inverse variance weighted | 11.000 | -0.365 | 0.149 | 0.014 | -0.657 | -0.072 | 0.694 | 0.518 | 0.930 |
| Gut microbiota abundance (genus Coprococcus2 id.11302) | Fibromyalgia | MR Egger | 8.000 | 1.753 | 1.273 | 0.218 | -0.743 | 4.248 | 5.769 | 0.476 | 69.942 |
| Gut microbiota abundance (genus Coprococcus2 id.11302) | Fibromyalgia | Weighted median | 8.000 | 0.145 | 0.202 | 0.471 | -0.250 | 0.541 | 1.156 | 0.779 | 1.717 |
| Gut microbiota abundance (genus Coprococcus2 id.11302) | Fibromyalgia | Inverse variance weighted | 8.000 | 0.187 | 0.162 | 0.248 | -0.130 | 0.504 | 1.205 | 0.878 | 1.655 |
| Gut microbiota abundance (genus Coprococcus3 id.11303) | Fibromyalgia | MR Egger | 9.000 | -0.997 | 1.026 | 0.363 | -3.009 | 1.014 | 0.369 | 0.049 | 2.757 |
| Gut microbiota abundance (genus Coprococcus3 id.11303) | Fibromyalgia | Weighted median | 9.000 | -0.072 | 0.248 | 0.772 | -0.557 | 0.414 | 0.931 | 0.573 | 1.512 |
| Gut microbiota abundance (genus Coprococcus3 id.11303) | Fibromyalgia | Inverse variance weighted | 9.000 | 0.014 | 0.183 | 0.939 | -0.344 | 0.372 | 1.014 | 0.709 | 1.451 |
| Gut microbiota abundance (genus Defluviitaleaceae UCG011 id.11287) | Fibromyalgia | MR Egger | 9.000 | 0.572 | 0.476 | 0.269 | -0.361 | 1.505 | 1.771 | 0.697 | 4.504 |
| Gut microbiota abundance (genus Defluviitaleaceae UCG011 id.11287) | Fibromyalgia | Weighted median | 9.000 | 0.144 | 0.178 | 0.419 | -0.206 | 0.494 | 1.155 | 0.814 | 1.639 |
| Gut microbiota abundance (genus Defluviitaleaceae UCG011 id.11287) | Fibromyalgia | Inverse variance weighted | 9.000 | 0.032 | 0.132 | 0.808 | -0.226 | 0.290 | 1.033 | 0.797 | 1.337 |
| Gut microbiota abundance (genus Desulfovibrio id.3173) | Fibromyalgia | MR Egger | 9.000 | -0.295 | 0.569 | 0.620 | -1.410 | 0.820 | 0.745 | 0.244 | 2.271 |
| Gut microbiota abundance (genus Desulfovibrio id.3173) | Fibromyalgia | Weighted median | 9.000 | 0.030 | 0.196 | 0.880 | -0.354 | 0.413 | 1.030 | 0.702 | 1.511 |
| Gut microbiota abundance (genus Desulfovibrio id.3173) | Fibromyalgia | Inverse variance weighted | 9.000 | -0.046 | 0.182 | 0.800 | -0.403 | 0.311 | 0.955 | 0.668 | 1.364 |
| Gut microbiota abundance (genus Dialister id.2183) | Fibromyalgia | MR Egger | 11.000 | 0.514 | 0.648 | 0.448 | -0.756 | 1.784 | 1.672 | 0.469 | 5.953 |
| Gut microbiota abundance (genus Dialister id.2183) | Fibromyalgia | Weighted median | 11.000 | 0.003 | 0.205 | 0.989 | -0.398 | 0.404 | 1.003 | 0.671 | 1.498 |
| Gut microbiota abundance (genus Dialister id.2183) | Fibromyalgia | Inverse variance weighted | 11.000 | 0.278 | 0.151 | 0.065 | -0.017 | 0.573 | 1.321 | 0.983 | 1.774 |
| Gut microbiota abundance (genus Dorea id.1997) | Fibromyalgia | MR Egger | 10.000 | 0.373 | 0.492 | 0.470 | -0.591 | 1.337 | 1.453 | 0.554 | 3.809 |
| Gut microbiota abundance (genus Dorea id.1997) | Fibromyalgia | Weighted median | 10.000 | 0.004 | 0.243 | 0.988 | -0.473 | 0.480 | 1.004 | 0.623 | 1.617 |
| Gut microbiota abundance (genus Dorea id.1997) | Fibromyalgia | Inverse variance weighted | 10.000 | -0.116 | 0.177 | 0.513 | -0.463 | 0.231 | 0.891 | 0.630 | 1.260 |
| Gut microbiota abundance (genus Eggerthella id.819) | Fibromyalgia | MR Egger | 10.000 | 0.288 | 0.453 | 0.543 | -0.601 | 1.176 | 1.333 | 0.548 | 3.242 |
| Gut microbiota abundance (genus Eggerthella id.819) | Fibromyalgia | Weighted median | 10.000 | 0.270 | 0.131 | 0.039 | 0.014 | 0.526 | 1.310 | 1.014 | 1.693 |
| Gut microbiota abundance (genus Eggerthella id.819) | Fibromyalgia | Inverse variance weighted | 10.000 | 0.271 | 0.098 | 0.006 | 0.078 | 0.463 | 1.311 | 1.081 | 1.589 |
| Gut microbiota abundance (genus Eisenbergiella id.11304) | Fibromyalgia | MR Egger | 11.000 | 1.056 | 0.699 | 0.165 | -0.314 | 2.427 | 2.876 | 0.731 | 11.320 |
| Gut microbiota abundance (genus Eisenbergiella id.11304) | Fibromyalgia | Weighted median | 11.000 | -0.142 | 0.129 | 0.272 | -0.395 | 0.111 | 0.868 | 0.674 | 1.118 |
| Gut microbiota abundance (genus Eisenbergiella id.11304) | Fibromyalgia | Inverse variance weighted | 11.000 | -0.116 | 0.100 | 0.249 | -0.312 | 0.081 | 0.891 | 0.732 | 1.085 |
| Gut microbiota abundance (genus Enterorhabdus id.820) | Fibromyalgia | MR Egger | 6.000 | -0.303 | 0.400 | 0.492 | -1.087 | 0.482 | 0.739 | 0.337 | 1.619 |
| Gut microbiota abundance (genus Enterorhabdus id.820) | Fibromyalgia | Weighted median | 6.000 | -0.314 | 0.192 | 0.102 | -0.690 | 0.062 | 0.731 | 0.502 | 1.064 |
| Gut microbiota abundance (genus Enterorhabdus id.820) | Fibromyalgia | Inverse variance weighted | 6.000 | -0.235 | 0.151 | 0.119 | -0.531 | 0.060 | 0.790 | 0.588 | 1.062 |
| Gut microbiota abundance (genus Erysipelatoclostridium id.11381) | Fibromyalgia | MR Egger | 15.000 | -0.180 | 0.568 | 0.756 | -1.293 | 0.932 | 0.835 | 0.274 | 2.540 |
| Gut microbiota abundance (genus Erysipelatoclostridium id.11381) | Fibromyalgia | Weighted median | 15.000 | -0.123 | 0.148 | 0.403 | -0.413 | 0.166 | 0.884 | 0.662 | 1.181 |
| Gut microbiota abundance (genus Erysipelatoclostridium id.11381) | Fibromyalgia | Inverse variance weighted | 15.000 | -0.163 | 0.139 | 0.243 | -0.436 | 0.111 | 0.850 | 0.647 | 1.117 |
| Gut microbiota abundance (genus Erysipelotrichaceae UCG003 id.11384) | Fibromyalgia | Wald ratio | 1.000 | -0.136 | 0.411 | 0.741 | -0.942 | 0.670 | 0.873 | 0.390 | 1.954 |
| Gut microbiota abundance (genus Escherichia Shigella id.3504) | Fibromyalgia | MR Egger | 10.000 | -0.317 | 0.488 | 0.535 | -1.274 | 0.640 | 0.729 | 0.280 | 1.897 |
| Gut microbiota abundance (genus Escherichia Shigella id.3504) | Fibromyalgia | Weighted median | 10.000 | 0.244 | 0.209 | 0.243 | -0.165 | 0.652 | 1.276 | 0.848 | 1.920 |
| Gut microbiota abundance (genus Escherichia Shigella id.3504) | Fibromyalgia | Inverse variance weighted | 10.000 | 0.260 | 0.161 | 0.107 | -0.056 | 0.576 | 1.297 | 0.946 | 1.779 |
| Gut microbiota abundance (genus Eubacterium brachy group id.11296) | Fibromyalgia | MR Egger | 10.000 | 0.395 | 0.572 | 0.510 | -0.727 | 1.516 | 1.484 | 0.483 | 4.555 |
| Gut microbiota abundance (genus Eubacterium brachy group id.11296) | Fibromyalgia | Weighted median | 10.000 | 0.205 | 0.133 | 0.122 | -0.055 | 0.465 | 1.227 | 0.946 | 1.592 |
| Gut microbiota abundance (genus Eubacterium brachy group id.11296) | Fibromyalgia | Inverse variance weighted | 10.000 | 0.131 | 0.135 | 0.334 | -0.134 | 0.396 | 1.140 | 0.874 | 1.486 |
| Gut microbiota abundance (genus Eubacterium coprostanoligenes group id.11375) | Fibromyalgia | MR Egger | 13.000 | 0.045 | 0.710 | 0.951 | -1.346 | 1.437 | 1.046 | 0.260 | 4.207 |
| Gut microbiota abundance (genus Eubacterium coprostanoligenes group id.11375) | Fibromyalgia | Weighted median | 13.000 | 0.033 | 0.215 | 0.879 | -0.389 | 0.454 | 1.033 | 0.678 | 1.575 |
| Gut microbiota abundance (genus Eubacterium coprostanoligenes group id.11375) | Fibromyalgia | Inverse variance weighted | 13.000 | 0.065 | 0.174 | 0.710 | -0.276 | 0.405 | 1.067 | 0.759 | 1.500 |
| Gut microbiota abundance (genus Eubacterium eligens group id.14372) | Fibromyalgia | MR Egger | 7.000 | 1.001 | 0.744 | 0.236 | -0.457 | 2.459 | 2.721 | 0.633 | 11.695 |
| Gut microbiota abundance (genus Eubacterium eligens group id.14372) | Fibromyalgia | Weighted median | 7.000 | -0.225 | 0.270 | 0.403 | -0.754 | 0.303 | 0.798 | 0.471 | 1.354 |
| Gut microbiota abundance (genus Eubacterium eligens group id.14372) | Fibromyalgia | Inverse variance weighted | 7.000 | -0.263 | 0.208 | 0.206 | -0.670 | 0.144 | 0.769 | 0.512 | 1.155 |
| Gut microbiota abundance (genus Eubacterium fissicatena group id.14373) | Fibromyalgia | MR Egger | 9.000 | 0.676 | 0.497 | 0.216 | -0.298 | 1.650 | 1.966 | 0.742 | 5.205 |
| Gut microbiota abundance (genus Eubacterium fissicatena group id.14373) | Fibromyalgia | Weighted median | 9.000 | 0.007 | 0.129 | 0.959 | -0.246 | 0.259 | 1.007 | 0.782 | 1.295 |
| Gut microbiota abundance (genus Eubacterium fissicatena group id.14373) | Fibromyalgia | Inverse variance weighted | 9.000 | 0.028 | 0.100 | 0.777 | -0.168 | 0.224 | 1.029 | 0.846 | 1.252 |
| Gut microbiota abundance (genus Eubacterium hallii group id.11338) | Fibromyalgia | MR Egger | 14.000 | -0.246 | 0.336 | 0.478 | -0.904 | 0.412 | 0.782 | 0.405 | 1.511 |
| Gut microbiota abundance (genus Eubacterium hallii group id.11338) | Fibromyalgia | Weighted median | 14.000 | -0.002 | 0.189 | 0.991 | -0.373 | 0.368 | 0.998 | 0.689 | 1.445 |
| Gut microbiota abundance (genus Eubacterium hallii group id.11338) | Fibromyalgia | Inverse variance weighted | 14.000 | 0.149 | 0.167 | 0.373 | -0.178 | 0.476 | 1.161 | 0.837 | 1.610 |
| Gut microbiota abundance (genus Eubacterium nodatum group id.11297) | Fibromyalgia | MR Egger | 11.000 | 0.234 | 0.331 | 0.498 | -0.415 | 0.883 | 1.264 | 0.660 | 2.419 |
| Gut microbiota abundance (genus Eubacterium nodatum group id.11297) | Fibromyalgia | Weighted median | 11.000 | 0.140 | 0.098 | 0.156 | -0.053 | 0.333 | 1.150 | 0.948 | 1.395 |
| Gut microbiota abundance (genus Eubacterium nodatum group id.11297) | Fibromyalgia | Inverse variance weighted | 11.000 | 0.090 | 0.074 | 0.224 | -0.055 | 0.236 | 1.095 | 0.946 | 1.266 |
| Gut microbiota abundance (genus Eubacterium oxidoreducens group id.11339) | Fibromyalgia | MR Egger | 5.000 | 0.242 | 0.503 | 0.663 | -0.744 | 1.228 | 1.274 | 0.475 | 3.415 |
| Gut microbiota abundance (genus Eubacterium oxidoreducens group id.11339) | Fibromyalgia | Weighted median | 5.000 | 0.150 | 0.159 | 0.345 | -0.162 | 0.462 | 1.162 | 0.851 | 1.587 |
| Gut microbiota abundance (genus Eubacterium oxidoreducens group id.11339) | Fibromyalgia | Inverse variance weighted | 5.000 | 0.120 | 0.136 | 0.376 | -0.146 | 0.386 | 1.128 | 0.864 | 1.471 |
| Gut microbiota abundance (genus Eubacterium rectale group id.14374) | Fibromyalgia | MR Egger | 8.000 | 1.037 | 0.683 | 0.180 | -0.301 | 2.376 | 2.822 | 0.740 | 10.758 |
| Gut microbiota abundance (genus Eubacterium rectale group id.14374) | Fibromyalgia | Weighted median | 8.000 | 0.117 | 0.262 | 0.655 | -0.397 | 0.631 | 1.124 | 0.672 | 1.880 |
| Gut microbiota abundance (genus Eubacterium rectale group id.14374) | Fibromyalgia | Inverse variance weighted | 8.000 | -0.067 | 0.196 | 0.731 | -0.451 | 0.317 | 0.935 | 0.637 | 1.372 |
| Gut microbiota abundance (genus Eubacterium ruminantium group id.11340) | Fibromyalgia | MR Egger | 18.000 | 0.325 | 0.274 | 0.252 | -0.211 | 0.861 | 1.384 | 0.810 | 2.366 |
| Gut microbiota abundance (genus Eubacterium ruminantium group id.11340) | Fibromyalgia | Weighted median | 18.000 | 0.057 | 0.118 | 0.629 | -0.174 | 0.288 | 1.059 | 0.840 | 1.334 |
| Gut microbiota abundance (genus Eubacterium ruminantium group id.11340) | Fibromyalgia | Inverse variance weighted | 18.000 | -0.029 | 0.082 | 0.722 | -0.190 | 0.132 | 0.971 | 0.827 | 1.141 |
| Gut microbiota abundance (genus Eubacterium ventriosum group id.11341) | Fibromyalgia | MR Egger | 15.000 | 1.208 | 0.724 | 0.119 | -0.211 | 2.627 | 3.347 | 0.809 | 13.836 |
| Gut microbiota abundance (genus Eubacterium ventriosum group id.11341) | Fibromyalgia | Weighted median | 15.000 | 0.430 | 0.190 | 0.023 | 0.058 | 0.803 | 1.538 | 1.060 | 2.232 |
| Gut microbiota abundance (genus Eubacterium ventriosum group id.11341) | Fibromyalgia | Inverse variance weighted | 15.000 | 0.085 | 0.171 | 0.619 | -0.250 | 0.420 | 1.089 | 0.779 | 1.522 |
| Gut microbiota abundance (genus Eubacterium xylanophilum group id.14375) | Fibromyalgia | MR Egger | 9.000 | -0.142 | 0.579 | 0.813 | -1.276 | 0.992 | 0.868 | 0.279 | 2.698 |
| Gut microbiota abundance (genus Eubacterium xylanophilum group id.14375) | Fibromyalgia | Weighted median | 9.000 | 0.058 | 0.207 | 0.779 | -0.348 | 0.464 | 1.060 | 0.706 | 1.590 |
| Gut microbiota abundance (genus Eubacterium xylanophilum group id.14375) | Fibromyalgia | Inverse variance weighted | 9.000 | 0.059 | 0.183 | 0.748 | -0.300 | 0.418 | 1.061 | 0.741 | 1.519 |
| Gut microbiota abundance (genus Faecalibacterium id.2057) | Fibromyalgia | MR Egger | 10.000 | 0.314 | 0.263 | 0.267 | -0.202 | 0.830 | 1.369 | 0.817 | 2.293 |
| Gut microbiota abundance (genus Faecalibacterium id.2057) | Fibromyalgia | Weighted median | 10.000 | 0.186 | 0.185 | 0.314 | -0.176 | 0.547 | 1.204 | 0.839 | 1.728 |
| Gut microbiota abundance (genus Faecalibacterium id.2057) | Fibromyalgia | Inverse variance weighted | 10.000 | 0.022 | 0.135 | 0.871 | -0.242 | 0.286 | 1.022 | 0.785 | 1.331 |
| Gut microbiota abundance (genus Family XIII AD3011 group id.11293) | Fibromyalgia | MR Egger | 13.000 | -0.866 | 0.650 | 0.210 | -2.140 | 0.408 | 0.421 | 0.118 | 1.504 |
| Gut microbiota abundance (genus Family XIII AD3011 group id.11293) | Fibromyalgia | Weighted median | 13.000 | -0.105 | 0.191 | 0.582 | -0.478 | 0.269 | 0.900 | 0.620 | 1.308 |
| Gut microbiota abundance (genus Family XIII AD3011 group id.11293) | Fibromyalgia | Inverse variance weighted | 13.000 | -0.191 | 0.137 | 0.164 | -0.461 | 0.078 | 0.826 | 0.631 | 1.081 |
| Gut microbiota abundance (genus Family XIII UCG001 id.11294) | Fibromyalgia | MR Egger | 8.000 | 0.291 | 0.500 | 0.581 | -0.688 | 1.271 | 1.338 | 0.502 | 3.565 |
| Gut microbiota abundance (genus Family XIII UCG001 id.11294) | Fibromyalgia | Weighted median | 8.000 | -0.207 | 0.203 | 0.307 | -0.604 | 0.190 | 0.813 | 0.547 | 1.209 |
| Gut microbiota abundance (genus Family XIII UCG001 id.11294) | Fibromyalgia | Inverse variance weighted | 8.000 | -0.110 | 0.161 | 0.496 | -0.425 | 0.206 | 0.896 | 0.654 | 1.229 |
| Gut microbiota abundance (genus Flavonifractor id.2059) | Fibromyalgia | MR Egger | 5.000 | 0.129 | 0.753 | 0.875 | -1.348 | 1.605 | 1.137 | 0.260 | 4.977 |
| Gut microbiota abundance (genus Flavonifractor id.2059) | Fibromyalgia | Weighted median | 5.000 | 0.048 | 0.240 | 0.841 | -0.422 | 0.519 | 1.049 | 0.656 | 1.680 |
| Gut microbiota abundance (genus Flavonifractor id.2059) | Fibromyalgia | Inverse variance weighted | 5.000 | 0.017 | 0.189 | 0.927 | -0.353 | 0.387 | 1.017 | 0.703 | 1.473 |
| Gut microbiota abundance (genus Fusicatenibacter id.11305) | Fibromyalgia | MR Egger | 18.000 | 0.140 | 0.574 | 0.810 | -0.984 | 1.265 | 1.150 | 0.374 | 3.542 |
| Gut microbiota abundance (genus Fusicatenibacter id.11305) | Fibromyalgia | Weighted median | 18.000 | -0.035 | 0.199 | 0.860 | -0.424 | 0.354 | 0.966 | 0.654 | 1.425 |
| Gut microbiota abundance (genus Fusicatenibacter id.11305) | Fibromyalgia | Inverse variance weighted | 18.000 | 0.075 | 0.149 | 0.614 | -0.216 | 0.367 | 1.078 | 0.805 | 1.443 |
| Gut microbiota abundance (genus Gordonibacter id.821) | Fibromyalgia | MR Egger | 11.000 | 0.030 | 0.327 | 0.930 | -0.611 | 0.670 | 1.030 | 0.543 | 1.955 |
| Gut microbiota abundance (genus Gordonibacter id.821) | Fibromyalgia | Weighted median | 11.000 | 0.143 | 0.096 | 0.138 | -0.046 | 0.331 | 1.153 | 0.955 | 1.393 |
| Gut microbiota abundance (genus Gordonibacter id.821) | Fibromyalgia | Inverse variance weighted | 11.000 | 0.133 | 0.077 | 0.084 | -0.018 | 0.284 | 1.143 | 0.982 | 1.329 |
| Gut microbiota abundance (genus Haemophilus id.3698) | Fibromyalgia | MR Egger | 9.000 | 0.023 | 0.273 | 0.935 | -0.512 | 0.557 | 1.023 | 0.600 | 1.746 |
| Gut microbiota abundance (genus Haemophilus id.3698) | Fibromyalgia | Weighted median | 9.000 | 0.127 | 0.150 | 0.398 | -0.167 | 0.420 | 1.135 | 0.846 | 1.522 |
| Gut microbiota abundance (genus Haemophilus id.3698) | Fibromyalgia | Inverse variance weighted | 9.000 | 0.049 | 0.115 | 0.673 | -0.177 | 0.274 | 1.050 | 0.838 | 1.315 |
| Gut microbiota abundance (genus Holdemanella id.11393) | Fibromyalgia | MR Egger | 11.000 | -0.226 | 0.283 | 0.445 | -0.780 | 0.328 | 0.798 | 0.459 | 1.389 |
| Gut microbiota abundance (genus Holdemanella id.11393) | Fibromyalgia | Weighted median | 11.000 | 0.066 | 0.136 | 0.630 | -0.202 | 0.333 | 1.068 | 0.817 | 1.395 |
| Gut microbiota abundance (genus Holdemanella id.11393) | Fibromyalgia | Inverse variance weighted | 11.000 | 0.062 | 0.099 | 0.530 | -0.132 | 0.256 | 1.064 | 0.877 | 1.291 |
| Gut microbiota abundance (genus Holdemania id.2157) | Fibromyalgia | MR Egger | 15.000 | -0.147 | 0.359 | 0.689 | -0.850 | 0.556 | 0.864 | 0.428 | 1.744 |
| Gut microbiota abundance (genus Holdemania id.2157) | Fibromyalgia | Weighted median | 15.000 | 0.001 | 0.146 | 0.997 | -0.285 | 0.286 | 1.001 | 0.752 | 1.332 |
| Gut microbiota abundance (genus Holdemania id.2157) | Fibromyalgia | Inverse variance weighted | 15.000 | 0.028 | 0.114 | 0.809 | -0.196 | 0.251 | 1.028 | 0.822 | 1.286 |
| Gut microbiota abundance (genus Howardella id.2000) | Fibromyalgia | MR Egger | 10.000 | -0.107 | 0.451 | 0.819 | -0.992 | 0.778 | 0.899 | 0.371 | 2.177 |
| Gut microbiota abundance (genus Howardella id.2000) | Fibromyalgia | Weighted median | 10.000 | 0.049 | 0.109 | 0.654 | -0.164 | 0.261 | 1.050 | 0.849 | 1.299 |
| Gut microbiota abundance (genus Howardella id.2000) | Fibromyalgia | Inverse variance weighted | 10.000 | 0.022 | 0.105 | 0.833 | -0.183 | 0.227 | 1.022 | 0.833 | 1.255 |
| Gut microbiota abundance (genus Hungatella id.11306) | Fibromyalgia | MR Egger | 5.000 | -0.319 | 0.982 | 0.767 | -2.244 | 1.607 | 0.727 | 0.106 | 4.986 |
| Gut microbiota abundance (genus Hungatella id.11306) | Fibromyalgia | Weighted median | 5.000 | 0.158 | 0.151 | 0.295 | -0.138 | 0.454 | 1.171 | 0.871 | 1.574 |
| Gut microbiota abundance (genus Hungatella id.11306) | Fibromyalgia | Inverse variance weighted | 5.000 | 0.076 | 0.144 | 0.598 | -0.207 | 0.359 | 1.079 | 0.813 | 1.431 |
| Gut microbiota abundance (genus Intestinibacter id.11345) | Fibromyalgia | MR Egger | 15.000 | 0.127 | 0.378 | 0.742 | -0.614 | 0.869 | 1.136 | 0.541 | 2.384 |
| Gut microbiota abundance (genus Intestinibacter id.11345) | Fibromyalgia | Weighted median | 15.000 | 0.112 | 0.158 | 0.478 | -0.198 | 0.422 | 1.119 | 0.821 | 1.525 |
| Gut microbiota abundance (genus Intestinibacter id.11345) | Fibromyalgia | Inverse variance weighted | 15.000 | 0.044 | 0.116 | 0.708 | -0.184 | 0.271 | 1.045 | 0.832 | 1.312 |
| Gut microbiota abundance (genus Intestinimonas id.2062) | Fibromyalgia | MR Egger | 16.000 | -0.142 | 0.307 | 0.650 | -0.745 | 0.460 | 0.867 | 0.475 | 1.584 |
| Gut microbiota abundance (genus Intestinimonas id.2062) | Fibromyalgia | Weighted median | 16.000 | -0.054 | 0.160 | 0.733 | -0.368 | 0.259 | 0.947 | 0.692 | 1.295 |
| Gut microbiota abundance (genus Intestinimonas id.2062) | Fibromyalgia | Inverse variance weighted | 16.000 | 0.096 | 0.111 | 0.389 | -0.122 | 0.313 | 1.100 | 0.885 | 1.368 |
| Gut microbiota abundance (genus Lachnoclostridium id.11308) | Fibromyalgia | MR Egger | 13.000 | -0.749 | 0.509 | 0.169 | -1.747 | 0.249 | 0.473 | 0.174 | 1.283 |
| Gut microbiota abundance (genus Lachnoclostridium id.11308) | Fibromyalgia | Weighted median | 13.000 | -0.117 | 0.213 | 0.583 | -0.535 | 0.301 | 0.889 | 0.586 | 1.351 |
| Gut microbiota abundance (genus Lachnoclostridium id.11308) | Fibromyalgia | Inverse variance weighted | 13.000 | -0.175 | 0.150 | 0.244 | -0.469 | 0.119 | 0.840 | 0.626 | 1.127 |
| Gut microbiota abundance (genus Lachnospiraceae FCS020 group id.11314) | Fibromyalgia | MR Egger | 12.000 | 0.101 | 0.354 | 0.781 | -0.593 | 0.796 | 1.107 | 0.553 | 2.217 |
| Gut microbiota abundance (genus Lachnospiraceae FCS020 group id.11314) | Fibromyalgia | Weighted median | 12.000 | -0.053 | 0.185 | 0.774 | -0.415 | 0.309 | 0.948 | 0.661 | 1.362 |
| Gut microbiota abundance (genus Lachnospiraceae FCS020 group id.11314) | Fibromyalgia | Inverse variance weighted | 12.000 | -0.073 | 0.133 | 0.585 | -0.334 | 0.188 | 0.930 | 0.716 | 1.207 |
| Gut microbiota abundance (genus Lachnospiraceae NC2004 group id.11316) | Fibromyalgia | MR Egger | 9.000 | 0.603 | 0.589 | 0.340 | -0.552 | 1.758 | 1.828 | 0.576 | 5.802 |
| Gut microbiota abundance (genus Lachnospiraceae NC2004 group id.11316) | Fibromyalgia | Weighted median | 9.000 | 0.150 | 0.170 | 0.380 | -0.184 | 0.484 | 1.161 | 0.832 | 1.622 |
| Gut microbiota abundance (genus Lachnospiraceae NC2004 group id.11316) | Fibromyalgia | Inverse variance weighted | 9.000 | 0.195 | 0.140 | 0.165 | -0.080 | 0.470 | 1.215 | 0.923 | 1.600 |
| Gut microbiota abundance (genus Lachnospiraceae ND3007 group id.11317) | Fibromyalgia | MR Egger | 3.000 | 6.640 | 5.292 | 0.428 | -3.733 | 17.014 | 765.278 | 0.024 | 24483506.828 |
| Gut microbiota abundance (genus Lachnospiraceae ND3007 group id.11317) | Fibromyalgia | Weighted median | 3.000 | -0.036 | 0.399 | 0.929 | -0.818 | 0.747 | 0.965 | 0.441 | 2.110 |
| Gut microbiota abundance (genus Lachnospiraceae ND3007 group id.11317) | Fibromyalgia | Inverse variance weighted | 3.000 | -0.017 | 0.357 | 0.963 | -0.717 | 0.684 | 0.983 | 0.488 | 1.982 |
| Gut microbiota abundance (genus Lachnospiraceae NK4A136 group id.11319) | Fibromyalgia | MR Egger | 15.000 | -0.061 | 0.237 | 0.801 | -0.525 | 0.403 | 0.941 | 0.592 | 1.497 |
| Gut microbiota abundance (genus Lachnospiraceae NK4A136 group id.11319) | Fibromyalgia | Weighted median | 15.000 | -0.222 | 0.175 | 0.205 | -0.566 | 0.121 | 0.801 | 0.568 | 1.129 |
| Gut microbiota abundance (genus Lachnospiraceae NK4A136 group id.11319) | Fibromyalgia | Inverse variance weighted | 15.000 | -0.090 | 0.118 | 0.446 | -0.322 | 0.142 | 0.914 | 0.724 | 1.152 |
| Gut microbiota abundance (genus Lachnospiraceae UCG001 id.11321) | Fibromyalgia | MR Egger | 13.000 | 0.342 | 0.550 | 0.546 | -0.735 | 1.420 | 1.408 | 0.479 | 4.135 |
| Gut microbiota abundance (genus Lachnospiraceae UCG001 id.11321) | Fibromyalgia | Weighted median | 13.000 | -0.080 | 0.164 | 0.627 | -0.401 | 0.241 | 0.923 | 0.670 | 1.273 |
| Gut microbiota abundance (genus Lachnospiraceae UCG001 id.11321) | Fibromyalgia | Inverse variance weighted | 13.000 | -0.033 | 0.124 | 0.788 | -0.277 | 0.210 | 0.967 | 0.758 | 1.234 |
| Gut microbiota abundance (genus Lachnospiraceae UCG004 id.11324) | Fibromyalgia | MR Egger | 12.000 | 0.079 | 0.623 | 0.901 | -1.142 | 1.301 | 1.082 | 0.319 | 3.671 |
| Gut microbiota abundance (genus Lachnospiraceae UCG004 id.11324) | Fibromyalgia | Weighted median | 12.000 | 0.157 | 0.186 | 0.399 | -0.208 | 0.522 | 1.170 | 0.812 | 1.685 |
| Gut microbiota abundance (genus Lachnospiraceae UCG004 id.11324) | Fibromyalgia | Inverse variance weighted | 12.000 | 0.035 | 0.149 | 0.814 | -0.258 | 0.328 | 1.036 | 0.773 | 1.388 |
| Gut microbiota abundance (genus Lachnospiraceae UCG008 id.11328) | Fibromyalgia | MR Egger | 10.000 | 0.646 | 0.527 | 0.255 | -0.387 | 1.679 | 1.908 | 0.679 | 5.360 |
| Gut microbiota abundance (genus Lachnospiraceae UCG008 id.11328) | Fibromyalgia | Weighted median | 10.000 | 0.122 | 0.140 | 0.383 | -0.152 | 0.395 | 1.129 | 0.859 | 1.485 |
| Gut microbiota abundance (genus Lachnospiraceae UCG008 id.11328) | Fibromyalgia | Inverse variance weighted | 10.000 | 0.054 | 0.104 | 0.608 | -0.151 | 0.258 | 1.055 | 0.860 | 1.294 |
| Gut microbiota abundance (genus Lachnospiraceae UCG010 id.11330) | Fibromyalgia | MR Egger | 10.000 | -0.213 | 0.472 | 0.664 | -1.138 | 0.712 | 0.808 | 0.320 | 2.038 |
| Gut microbiota abundance (genus Lachnospiraceae UCG010 id.11330) | Fibromyalgia | Weighted median | 10.000 | -0.035 | 0.215 | 0.872 | -0.456 | 0.386 | 0.966 | 0.634 | 1.472 |
| Gut microbiota abundance (genus Lachnospiraceae UCG010 id.11330) | Fibromyalgia | Inverse variance weighted | 10.000 | -0.137 | 0.155 | 0.377 | -0.442 | 0.167 | 0.872 | 0.643 | 1.182 |
| Gut microbiota abundance (genus Lachnospira id.2004) | Fibromyalgia | Wald ratio | 1.000 | -0.308 | 0.555 | 0.579 | -1.396 | 0.780 | 0.735 | 0.248 | 2.181 |
| Gut microbiota abundance (genus Lactobacillus id.1837) | Fibromyalgia | MR Egger | 8.000 | -0.265 | 0.272 | 0.369 | -0.798 | 0.269 | 0.768 | 0.450 | 1.309 |
| Gut microbiota abundance (genus Lactobacillus id.1837) | Fibromyalgia | Weighted median | 8.000 | 0.213 | 0.141 | 0.132 | -0.064 | 0.489 | 1.237 | 0.938 | 1.631 |
| Gut microbiota abundance (genus Lactobacillus id.1837) | Fibromyalgia | Inverse variance weighted | 8.000 | 0.195 | 0.106 | 0.066 | -0.013 | 0.403 | 1.215 | 0.987 | 1.496 |
| Gut microbiota abundance (genus Lactococcus id.1851) | Fibromyalgia | MR Egger | 9.000 | 0.027 | 0.408 | 0.950 | -0.773 | 0.826 | 1.027 | 0.462 | 2.285 |
| Gut microbiota abundance (genus Lactococcus id.1851) | Fibromyalgia | Weighted median | 9.000 | 0.053 | 0.120 | 0.657 | -0.182 | 0.289 | 1.055 | 0.833 | 1.335 |
| Gut microbiota abundance (genus Lactococcus id.1851) | Fibromyalgia | Inverse variance weighted | 9.000 | 0.049 | 0.091 | 0.591 | -0.129 | 0.227 | 1.050 | 0.879 | 1.255 |
| Gut microbiota abundance (genus Marvinbryantia id.2005) | Fibromyalgia | MR Egger | 10.000 | 0.931 | 0.585 | 0.150 | -0.215 | 2.078 | 2.538 | 0.807 | 7.985 |
| Gut microbiota abundance (genus Marvinbryantia id.2005) | Fibromyalgia | Weighted median | 10.000 | 0.173 | 0.197 | 0.380 | -0.213 | 0.560 | 1.189 | 0.808 | 1.751 |
| Gut microbiota abundance (genus Marvinbryantia id.2005) | Fibromyalgia | Inverse variance weighted | 10.000 | 0.101 | 0.149 | 0.496 | -0.191 | 0.393 | 1.107 | 0.826 | 1.482 |
| Gut microbiota abundance (genus Methanobrevibacter id.123) | Fibromyalgia | MR Egger | 6.000 | 0.198 | 0.419 | 0.662 | -0.623 | 1.019 | 1.219 | 0.536 | 2.770 |
| Gut microbiota abundance (genus Methanobrevibacter id.123) | Fibromyalgia | Weighted median | 6.000 | -0.049 | 0.143 | 0.731 | -0.330 | 0.232 | 0.952 | 0.719 | 1.261 |
| Gut microbiota abundance (genus Methanobrevibacter id.123) | Fibromyalgia | Inverse variance weighted | 6.000 | -0.113 | 0.111 | 0.311 | -0.331 | 0.105 | 0.893 | 0.718 | 1.111 |
| Gut microbiota abundance (genus Odoribacter id.952) | Fibromyalgia | MR Egger | 7.000 | -0.916 | 0.578 | 0.174 | -2.049 | 0.217 | 0.400 | 0.129 | 1.242 |
| Gut microbiota abundance (genus Odoribacter id.952) | Fibromyalgia | Weighted median | 7.000 | -0.223 | 0.237 | 0.346 | -0.687 | 0.241 | 0.800 | 0.503 | 1.272 |
| Gut microbiota abundance (genus Odoribacter id.952) | Fibromyalgia | Inverse variance weighted | 7.000 | -0.150 | 0.184 | 0.417 | -0.511 | 0.212 | 0.861 | 0.600 | 1.236 |
| Gut microbiota abundance (genus Olsenella id.822) | Fibromyalgia | MR Egger | 11.000 | 0.088 | 0.280 | 0.760 | -0.461 | 0.637 | 1.092 | 0.631 | 1.891 |
| Gut microbiota abundance (genus Olsenella id.822) | Fibromyalgia | Weighted median | 11.000 | -0.049 | 0.104 | 0.634 | -0.253 | 0.154 | 0.952 | 0.776 | 1.167 |
| Gut microbiota abundance (genus Olsenella id.822) | Fibromyalgia | Inverse variance weighted | 11.000 | -0.067 | 0.082 | 0.410 | -0.227 | 0.093 | 0.935 | 0.797 | 1.097 |
| Gut microbiota abundance (genus Oscillibacter id.2063) | Fibromyalgia | MR Egger | 13.000 | -0.321 | 0.403 | 0.442 | -1.111 | 0.469 | 0.725 | 0.329 | 1.598 |
| Gut microbiota abundance (genus Oscillibacter id.2063) | Fibromyalgia | Weighted median | 13.000 | -0.264 | 0.144 | 0.066 | -0.545 | 0.018 | 0.768 | 0.580 | 1.018 |
| Gut microbiota abundance (genus Oscillibacter id.2063) | Fibromyalgia | Inverse variance weighted | 13.000 | -0.184 | 0.105 | 0.080 | -0.391 | 0.022 | 0.832 | 0.676 | 1.023 |
| Gut microbiota abundance (genus Oscillospira id.2064) | Fibromyalgia | MR Egger | 8.000 | 1.360 | 0.616 | 0.070 | 0.151 | 2.568 | 3.895 | 1.163 | 13.036 |
| Gut microbiota abundance (genus Oscillospira id.2064) | Fibromyalgia | Weighted median | 8.000 | 0.024 | 0.199 | 0.905 | -0.365 | 0.413 | 1.024 | 0.694 | 1.511 |
| Gut microbiota abundance (genus Oscillospira id.2064) | Fibromyalgia | Inverse variance weighted | 8.000 | 0.011 | 0.184 | 0.951 | -0.349 | 0.371 | 1.011 | 0.706 | 1.449 |
| Gut microbiota abundance (genus Oxalobacter id.2978) | Fibromyalgia | MR Egger | 11.000 | 0.124 | 0.459 | 0.794 | -0.776 | 1.023 | 1.132 | 0.460 | 2.783 |
| Gut microbiota abundance (genus Oxalobacter id.2978) | Fibromyalgia | Weighted median | 11.000 | -0.064 | 0.117 | 0.588 | -0.293 | 0.166 | 0.938 | 0.746 | 1.181 |
| Gut microbiota abundance (genus Oxalobacter id.2978) | Fibromyalgia | Inverse variance weighted | 11.000 | -0.044 | 0.093 | 0.639 | -0.227 | 0.139 | 0.957 | 0.797 | 1.149 |
| Gut microbiota abundance (genus Parabacteroides id.954) | Fibromyalgia | MR Egger | 5.000 | -1.261 | 1.429 | 0.442 | -4.062 | 1.540 | 0.283 | 0.017 | 4.663 |
| Gut microbiota abundance (genus Parabacteroides id.954) | Fibromyalgia | Weighted median | 5.000 | -0.355 | 0.266 | 0.182 | -0.876 | 0.167 | 0.701 | 0.416 | 1.181 |
| Gut microbiota abundance (genus Parabacteroides id.954) | Fibromyalgia | Inverse variance weighted | 5.000 | -0.368 | 0.229 | 0.108 | -0.818 | 0.081 | 0.692 | 0.441 | 1.084 |
| Gut microbiota abundance (genus Paraprevotella id.962) | Fibromyalgia | MR Egger | 13.000 | -0.260 | 0.412 | 0.542 | -1.068 | 0.548 | 0.771 | 0.344 | 1.730 |
| Gut microbiota abundance (genus Paraprevotella id.962) | Fibromyalgia | Weighted median | 13.000 | -0.009 | 0.131 | 0.947 | -0.264 | 0.247 | 0.991 | 0.768 | 1.280 |
| Gut microbiota abundance (genus Paraprevotella id.962) | Fibromyalgia | Inverse variance weighted | 13.000 | 0.070 | 0.108 | 0.520 | -0.142 | 0.282 | 1.072 | 0.867 | 1.325 |
| Gut microbiota abundance (genus Parasutterella id.2892) | Fibromyalgia | MR Egger | 14.000 | 0.177 | 0.301 | 0.567 | -0.412 | 0.766 | 1.193 | 0.662 | 2.151 |
| Gut microbiota abundance (genus Parasutterella id.2892) | Fibromyalgia | Weighted median | 14.000 | 0.054 | 0.155 | 0.726 | -0.250 | 0.359 | 1.056 | 0.779 | 1.431 |
| Gut microbiota abundance (genus Parasutterella id.2892) | Fibromyalgia | Inverse variance weighted | 14.000 | 0.076 | 0.108 | 0.483 | -0.136 | 0.288 | 1.079 | 0.873 | 1.334 |
| Gut microbiota abundance (genus Peptococcus id.2037) | Fibromyalgia | MR Egger | 12.000 | -0.082 | 0.368 | 0.828 | -0.804 | 0.639 | 0.921 | 0.448 | 1.895 |
| Gut microbiota abundance (genus Peptococcus id.2037) | Fibromyalgia | Weighted median | 12.000 | 0.069 | 0.115 | 0.549 | -0.156 | 0.293 | 1.071 | 0.856 | 1.341 |
| Gut microbiota abundance (genus Peptococcus id.2037) | Fibromyalgia | Inverse variance weighted | 12.000 | 0.028 | 0.092 | 0.757 | -0.152 | 0.208 | 1.029 | 0.859 | 1.231 |
| Gut microbiota abundance (genus Phascolarctobacterium id.2168) | Fibromyalgia | MR Egger | 8.000 | -0.480 | 0.750 | 0.546 | -1.950 | 0.990 | 0.619 | 0.142 | 2.692 |
| Gut microbiota abundance (genus Phascolarctobacterium id.2168) | Fibromyalgia | Weighted median | 8.000 | -0.193 | 0.203 | 0.343 | -0.591 | 0.206 | 0.825 | 0.554 | 1.228 |
| Gut microbiota abundance (genus Phascolarctobacterium id.2168) | Fibromyalgia | Inverse variance weighted | 8.000 | -0.211 | 0.152 | 0.164 | -0.510 | 0.087 | 0.809 | 0.601 | 1.090 |
| Gut microbiota abundance (genus Prevotella7 id.11182) | Fibromyalgia | MR Egger | 11.000 | 0.141 | 0.564 | 0.808 | -0.964 | 1.246 | 1.151 | 0.381 | 3.476 |
| Gut microbiota abundance (genus Prevotella7 id.11182) | Fibromyalgia | Weighted median | 11.000 | 0.098 | 0.120 | 0.412 | -0.136 | 0.333 | 1.103 | 0.872 | 1.395 |
| Gut microbiota abundance (genus Prevotella7 id.11182) | Fibromyalgia | Inverse variance weighted | 11.000 | -0.010 | 0.093 | 0.916 | -0.191 | 0.172 | 0.990 | 0.826 | 1.187 |
| Gut microbiota abundance (genus Prevotella9 id.11183) | Fibromyalgia | MR Egger | 15.000 | 0.038 | 0.291 | 0.899 | -0.532 | 0.608 | 1.038 | 0.587 | 1.836 |
| Gut microbiota abundance (genus Prevotella9 id.11183) | Fibromyalgia | Weighted median | 15.000 | -0.244 | 0.148 | 0.098 | -0.534 | 0.045 | 0.783 | 0.586 | 1.046 |
| Gut microbiota abundance (genus Prevotella9 id.11183) | Fibromyalgia | Inverse variance weighted | 15.000 | -0.214 | 0.100 | 0.031 | -0.409 | -0.019 | 0.807 | 0.664 | 0.981 |
| Gut microbiota abundance (genus Rikenellaceae RC9 gut group id.11191) | Fibromyalgia | MR Egger | 11.000 | -0.344 | 0.537 | 0.537 | -1.396 | 0.708 | 0.709 | 0.247 | 2.030 |
| Gut microbiota abundance (genus Rikenellaceae RC9 gut group id.11191) | Fibromyalgia | Weighted median | 11.000 | 0.003 | 0.109 | 0.977 | -0.210 | 0.216 | 1.003 | 0.810 | 1.242 |
| Gut microbiota abundance (genus Rikenellaceae RC9 gut group id.11191) | Fibromyalgia | Inverse variance weighted | 11.000 | 0.025 | 0.084 | 0.769 | -0.140 | 0.189 | 1.025 | 0.869 | 1.208 |
| Gut microbiota abundance (genus Romboutsia id.11347) | Fibromyalgia | MR Egger | 13.000 | -0.080 | 0.475 | 0.870 | -1.011 | 0.851 | 0.923 | 0.364 | 2.342 |
| Gut microbiota abundance (genus Romboutsia id.11347) | Fibromyalgia | Weighted median | 13.000 | -0.114 | 0.192 | 0.553 | -0.491 | 0.263 | 0.892 | 0.612 | 1.301 |
| Gut microbiota abundance (genus Romboutsia id.11347) | Fibromyalgia | Inverse variance weighted | 13.000 | -0.074 | 0.157 | 0.638 | -0.382 | 0.234 | 0.929 | 0.683 | 1.264 |
| Gut microbiota abundance (genus Roseburia id.2012) | Fibromyalgia | MR Egger | 13.000 | -0.408 | 0.519 | 0.449 | -1.426 | 0.610 | 0.665 | 0.240 | 1.840 |
| Gut microbiota abundance (genus Roseburia id.2012) | Fibromyalgia | Weighted median | 13.000 | -0.010 | 0.215 | 0.964 | -0.432 | 0.412 | 0.990 | 0.649 | 1.510 |
| Gut microbiota abundance (genus Roseburia id.2012) | Fibromyalgia | Inverse variance weighted | 13.000 | -0.026 | 0.169 | 0.875 | -0.357 | 0.304 | 0.974 | 0.700 | 1.356 |
| Gut microbiota abundance (genus Ruminiclostridium5 id.11355) | Fibromyalgia | MR Egger | 11.000 | 1.282 | 0.687 | 0.095 | -0.064 | 2.627 | 3.602 | 0.938 | 13.837 |
| Gut microbiota abundance (genus Ruminiclostridium5 id.11355) | Fibromyalgia | Weighted median | 11.000 | 0.441 | 0.221 | 0.046 | 0.008 | 0.875 | 1.555 | 1.008 | 2.399 |
| Gut microbiota abundance (genus Ruminiclostridium5 id.11355) | Fibromyalgia | Inverse variance weighted | 11.000 | 0.224 | 0.164 | 0.172 | -0.098 | 0.546 | 1.251 | 0.907 | 1.727 |
| Gut microbiota abundance (genus Ruminiclostridium6 id.11356) | Fibromyalgia | MR Egger | 16.000 | -0.123 | 0.313 | 0.701 | -0.737 | 0.491 | 0.884 | 0.479 | 1.634 |
| Gut microbiota abundance (genus Ruminiclostridium6 id.11356) | Fibromyalgia | Weighted median | 16.000 | -0.168 | 0.174 | 0.335 | -0.509 | 0.174 | 0.845 | 0.601 | 1.190 |
| Gut microbiota abundance (genus Ruminiclostridium6 id.11356) | Fibromyalgia | Inverse variance weighted | 16.000 | 0.089 | 0.121 | 0.465 | -0.149 | 0.327 | 1.093 | 0.861 | 1.386 |
| Gut microbiota abundance (genus Ruminiclostridium9 id.11357) | Fibromyalgia | MR Egger | 9.000 | 0.141 | 0.857 | 0.874 | -1.540 | 1.822 | 1.152 | 0.214 | 6.182 |
| Gut microbiota abundance (genus Ruminiclostridium9 id.11357) | Fibromyalgia | Weighted median | 9.000 | 0.018 | 0.259 | 0.945 | -0.489 | 0.525 | 1.018 | 0.613 | 1.691 |
| Gut microbiota abundance (genus Ruminiclostridium9 id.11357) | Fibromyalgia | Inverse variance weighted | 9.000 | -0.121 | 0.189 | 0.523 | -0.491 | 0.250 | 0.886 | 0.612 | 1.284 |
| Gut microbiota abundance (genus Ruminococcaceae NK4A214 group id.11358) | Fibromyalgia | MR Egger | 13.000 | 0.365 | 0.459 | 0.443 | -0.534 | 1.264 | 1.441 | 0.586 | 3.541 |
| Gut microbiota abundance (genus Ruminococcaceae NK4A214 group id.11358) | Fibromyalgia | Weighted median | 13.000 | 0.083 | 0.180 | 0.645 | -0.270 | 0.437 | 1.087 | 0.763 | 1.548 |
| Gut microbiota abundance (genus Ruminococcaceae NK4A214 group id.11358) | Fibromyalgia | Inverse variance weighted | 13.000 | 0.187 | 0.139 | 0.179 | -0.085 | 0.459 | 1.206 | 0.918 | 1.583 |
| Gut microbiota abundance (genus Ruminococcaceae UCG002 id.11360) | Fibromyalgia | MR Egger | 21.000 | -0.041 | 0.277 | 0.884 | -0.585 | 0.503 | 0.960 | 0.557 | 1.653 |
| Gut microbiota abundance (genus Ruminococcaceae UCG002 id.11360) | Fibromyalgia | Weighted median | 21.000 | 0.036 | 0.151 | 0.812 | -0.259 | 0.331 | 1.037 | 0.772 | 1.392 |
| Gut microbiota abundance (genus Ruminococcaceae UCG002 id.11360) | Fibromyalgia | Inverse variance weighted | 21.000 | -0.002 | 0.107 | 0.986 | -0.211 | 0.207 | 0.998 | 0.810 | 1.230 |
| Gut microbiota abundance (genus Ruminococcaceae UCG003 id.11361) | Fibromyalgia | MR Egger | 12.000 | 0.268 | 0.442 | 0.559 | -0.599 | 1.134 | 1.307 | 0.549 | 3.109 |
| Gut microbiota abundance (genus Ruminococcaceae UCG003 id.11361) | Fibromyalgia | Weighted median | 12.000 | 0.034 | 0.182 | 0.852 | -0.323 | 0.391 | 1.035 | 0.724 | 1.479 |
| Gut microbiota abundance (genus Ruminococcaceae UCG003 id.11361) | Fibromyalgia | Inverse variance weighted | 12.000 | 0.115 | 0.135 | 0.395 | -0.150 | 0.380 | 1.122 | 0.861 | 1.462 |
| Gut microbiota abundance (genus Ruminococcaceae UCG004 id.11362) | Fibromyalgia | MR Egger | 11.000 | -0.574 | 0.800 | 0.491 | -2.141 | 0.993 | 0.563 | 0.118 | 2.700 |
| Gut microbiota abundance (genus Ruminococcaceae UCG004 id.11362) | Fibromyalgia | Weighted median | 11.000 | -0.189 | 0.170 | 0.266 | -0.521 | 0.144 | 0.828 | 0.594 | 1.155 |
| Gut microbiota abundance (genus Ruminococcaceae UCG004 id.11362) | Fibromyalgia | Inverse variance weighted | 11.000 | -0.181 | 0.139 | 0.192 | -0.453 | 0.091 | 0.835 | 0.636 | 1.095 |
| Gut microbiota abundance (genus Ruminococcaceae UCG005 id.11363) | Fibromyalgia | MR Egger | 14.000 | 0.136 | 0.395 | 0.737 | -0.639 | 0.911 | 1.145 | 0.528 | 2.487 |
| Gut microbiota abundance (genus Ruminococcaceae UCG005 id.11363) | Fibromyalgia | Weighted median | 14.000 | 0.320 | 0.180 | 0.075 | -0.032 | 0.672 | 1.377 | 0.968 | 1.959 |
| Gut microbiota abundance (genus Ruminococcaceae UCG005 id.11363) | Fibromyalgia | Inverse variance weighted | 14.000 | 0.316 | 0.142 | 0.025 | 0.039 | 0.594 | 1.372 | 1.040 | 1.811 |
| Gut microbiota abundance (genus Ruminococcaceae UCG009 id.11366) | Fibromyalgia | MR Egger | 11.000 | 0.281 | 0.451 | 0.550 | -0.604 | 1.165 | 1.324 | 0.546 | 3.207 |
| Gut microbiota abundance (genus Ruminococcaceae UCG009 id.11366) | Fibromyalgia | Weighted median | 11.000 | 0.098 | 0.150 | 0.514 | -0.196 | 0.392 | 1.103 | 0.822 | 1.480 |
| Gut microbiota abundance (genus Ruminococcaceae UCG009 id.11366) | Fibromyalgia | Inverse variance weighted | 11.000 | -0.021 | 0.114 | 0.851 | -0.246 | 0.203 | 0.979 | 0.782 | 1.225 |
| Gut microbiota abundance (genus Ruminococcaceae UCG010 id.11367) | Fibromyalgia | MR Egger | 6.000 | -0.140 | 0.486 | 0.787 | -1.093 | 0.812 | 0.869 | 0.335 | 2.253 |
| Gut microbiota abundance (genus Ruminococcaceae UCG010 id.11367) | Fibromyalgia | Weighted median | 6.000 | 0.059 | 0.227 | 0.796 | -0.387 | 0.505 | 1.061 | 0.679 | 1.656 |
| Gut microbiota abundance (genus Ruminococcaceae UCG010 id.11367) | Fibromyalgia | Inverse variance weighted | 6.000 | 0.245 | 0.177 | 0.166 | -0.102 | 0.592 | 1.277 | 0.903 | 1.807 |
| Gut microbiota abundance (genus Ruminococcaceae UCG011 id.11368) | Fibromyalgia | MR Egger | 8.000 | -0.198 | 0.510 | 0.711 | -1.199 | 0.802 | 0.820 | 0.302 | 2.230 |
| Gut microbiota abundance (genus Ruminococcaceae UCG011 id.11368) | Fibromyalgia | Weighted median | 8.000 | 0.102 | 0.117 | 0.383 | -0.127 | 0.332 | 1.108 | 0.880 | 1.394 |
| Gut microbiota abundance (genus Ruminococcaceae UCG011 id.11368) | Fibromyalgia | Inverse variance weighted | 8.000 | 0.011 | 0.096 | 0.913 | -0.177 | 0.198 | 1.011 | 0.837 | 1.219 |
| Gut microbiota abundance (genus Ruminococcaceae UCG013 id.11370) | Fibromyalgia | MR Egger | 11.000 | -0.635 | 0.454 | 0.195 | -1.525 | 0.255 | 0.530 | 0.218 | 1.290 |
| Gut microbiota abundance (genus Ruminococcaceae UCG013 id.11370) | Fibromyalgia | Weighted median | 11.000 | -0.052 | 0.207 | 0.802 | -0.457 | 0.354 | 0.950 | 0.633 | 1.424 |
| Gut microbiota abundance (genus Ruminococcaceae UCG013 id.11370) | Fibromyalgia | Inverse variance weighted | 11.000 | -0.200 | 0.158 | 0.205 | -0.510 | 0.109 | 0.818 | 0.600 | 1.115 |
| Gut microbiota abundance (genus Ruminococcaceae UCG014 id.11371) | Fibromyalgia | MR Egger | 11.000 | -0.857 | 0.384 | 0.052 | -1.609 | -0.105 | 0.424 | 0.200 | 0.900 |
| Gut microbiota abundance (genus Ruminococcaceae UCG014 id.11371) | Fibromyalgia | Weighted median | 11.000 | -0.379 | 0.190 | 0.046 | -0.752 | -0.007 | 0.684 | 0.472 | 0.993 |
| Gut microbiota abundance (genus Ruminococcaceae UCG014 id.11371) | Fibromyalgia | Inverse variance weighted | 11.000 | -0.243 | 0.179 | 0.174 | -0.593 | 0.107 | 0.784 | 0.553 | 1.113 |
| Gut microbiota abundance (genus Ruminococcus1 id.11373) | Fibromyalgia | MR Egger | 10.000 | 0.708 | 0.628 | 0.292 | -0.523 | 1.939 | 2.029 | 0.593 | 6.949 |
| Gut microbiota abundance (genus Ruminococcus1 id.11373) | Fibromyalgia | Weighted median | 10.000 | 0.118 | 0.221 | 0.595 | -0.316 | 0.552 | 1.125 | 0.729 | 1.736 |
| Gut microbiota abundance (genus Ruminococcus1 id.11373) | Fibromyalgia | Inverse variance weighted | 10.000 | 0.095 | 0.237 | 0.689 | -0.370 | 0.560 | 1.100 | 0.691 | 1.751 |
| Gut microbiota abundance (genus Ruminococcus2 id.11374) | Fibromyalgia | MR Egger | 15.000 | -0.452 | 0.295 | 0.149 | -1.031 | 0.126 | 0.636 | 0.357 | 1.135 |
| Gut microbiota abundance (genus Ruminococcus2 id.11374) | Fibromyalgia | Weighted median | 15.000 | -0.333 | 0.160 | 0.037 | -0.646 | -0.019 | 0.717 | 0.524 | 0.981 |
| Gut microbiota abundance (genus Ruminococcus2 id.11374) | Fibromyalgia | Inverse variance weighted | 15.000 | -0.166 | 0.123 | 0.177 | -0.407 | 0.075 | 0.847 | 0.666 | 1.078 |
| Gut microbiota abundance (genus Ruminococcus gauvreauii group id.11342) | Fibromyalgia | MR Egger | 12.000 | -0.027 | 0.677 | 0.969 | -1.354 | 1.301 | 0.974 | 0.258 | 3.673 |
| Gut microbiota abundance (genus Ruminococcus gauvreauii group id.11342) | Fibromyalgia | Weighted median | 12.000 | 0.410 | 0.201 | 0.041 | 0.016 | 0.804 | 1.507 | 1.016 | 2.235 |
| Gut microbiota abundance (genus Ruminococcus gauvreauii group id.11342) | Fibromyalgia | Inverse variance weighted | 12.000 | 0.350 | 0.159 | 0.028 | 0.038 | 0.661 | 1.418 | 1.039 | 1.936 |
| Gut microbiota abundance (genus Ruminococcus gnavus group id.14376) | Fibromyalgia | MR Egger | 11.000 | 1.009 | 0.498 | 0.073 | 0.033 | 1.984 | 2.742 | 1.034 | 7.273 |
| Gut microbiota abundance (genus Ruminococcus gnavus group id.14376) | Fibromyalgia | Weighted median | 11.000 | 0.148 | 0.142 | 0.299 | -0.131 | 0.427 | 1.159 | 0.877 | 1.532 |
| Gut microbiota abundance (genus Ruminococcus gnavus group id.14376) | Fibromyalgia | Inverse variance weighted | 11.000 | 0.131 | 0.115 | 0.253 | -0.094 | 0.357 | 1.140 | 0.910 | 1.429 |
| Gut microbiota abundance (genus Ruminococcus torques group id.14377) | Fibromyalgia | MR Egger | 9.000 | 1.051 | 0.872 | 0.268 | -0.659 | 2.760 | 2.860 | 0.517 | 15.803 |
| Gut microbiota abundance (genus Ruminococcus torques group id.14377) | Fibromyalgia | Weighted median | 9.000 | 0.071 | 0.279 | 0.798 | -0.476 | 0.618 | 1.074 | 0.621 | 1.856 |
| Gut microbiota abundance (genus Ruminococcus torques group id.14377) | Fibromyalgia | Inverse variance weighted | 9.000 | 0.293 | 0.260 | 0.261 | -0.217 | 0.802 | 1.340 | 0.805 | 2.230 |
| Gut microbiota abundance (genus Sellimonas id.14369) | Fibromyalgia | MR Egger | 9.000 | -0.311 | 0.574 | 0.605 | -1.436 | 0.814 | 0.733 | 0.238 | 2.256 |
| Gut microbiota abundance (genus Sellimonas id.14369) | Fibromyalgia | Weighted median | 9.000 | 0.128 | 0.107 | 0.233 | -0.082 | 0.339 | 1.137 | 0.921 | 1.403 |
| Gut microbiota abundance (genus Sellimonas id.14369) | Fibromyalgia | Inverse variance weighted | 9.000 | -0.053 | 0.093 | 0.568 | -0.234 | 0.129 | 0.949 | 0.791 | 1.137 |
| Gut microbiota abundance (genus Senegalimassilia id.11160) | Fibromyalgia | MR Egger | 5.000 | -0.337 | 0.643 | 0.636 | -1.597 | 0.922 | 0.714 | 0.203 | 2.515 |
| Gut microbiota abundance (genus Senegalimassilia id.11160) | Fibromyalgia | Weighted median | 5.000 | -0.085 | 0.206 | 0.679 | -0.490 | 0.319 | 0.918 | 0.613 | 1.376 |
| Gut microbiota abundance (genus Senegalimassilia id.11160) | Fibromyalgia | Inverse variance weighted | 5.000 | -0.121 | 0.168 | 0.471 | -0.450 | 0.208 | 0.886 | 0.637 | 1.231 |
| Gut microbiota abundance (genus Slackia id.825) | Fibromyalgia | MR Egger | 6.000 | 1.565 | 0.911 | 0.161 | -0.220 | 3.350 | 4.783 | 0.803 | 28.499 |
| Gut microbiota abundance (genus Slackia id.825) | Fibromyalgia | Weighted median | 6.000 | 0.114 | 0.189 | 0.549 | -0.258 | 0.485 | 1.120 | 0.773 | 1.624 |
| Gut microbiota abundance (genus Slackia id.825) | Fibromyalgia | Inverse variance weighted | 6.000 | -0.013 | 0.163 | 0.935 | -0.333 | 0.307 | 0.987 | 0.717 | 1.359 |
| Gut microbiota abundance (genus Streptococcus id.1853) | Fibromyalgia | MR Egger | 15.000 | -0.268 | 0.507 | 0.606 | -1.261 | 0.725 | 0.765 | 0.283 | 2.065 |
| Gut microbiota abundance (genus Streptococcus id.1853) | Fibromyalgia | Weighted median | 15.000 | 0.020 | 0.192 | 0.915 | -0.357 | 0.398 | 1.021 | 0.700 | 1.488 |
| Gut microbiota abundance (genus Streptococcus id.1853) | Fibromyalgia | Inverse variance weighted | 15.000 | -0.067 | 0.138 | 0.626 | -0.339 | 0.204 | 0.935 | 0.713 | 1.226 |
| Gut microbiota abundance (genus Subdoligranulum id.2070) | Fibromyalgia | MR Egger | 11.000 | 0.149 | 0.392 | 0.712 | -0.618 | 0.917 | 1.161 | 0.539 | 2.502 |
| Gut microbiota abundance (genus Subdoligranulum id.2070) | Fibromyalgia | Weighted median | 11.000 | -0.049 | 0.199 | 0.803 | -0.438 | 0.340 | 0.952 | 0.645 | 1.405 |
| Gut microbiota abundance (genus Subdoligranulum id.2070) | Fibromyalgia | Inverse variance weighted | 11.000 | -0.142 | 0.151 | 0.347 | -0.438 | 0.154 | 0.868 | 0.646 | 1.166 |
| Gut microbiota abundance (genus Sutterella id.2896) | Fibromyalgia | MR Egger | 12.000 | 0.737 | 0.894 | 0.429 | -1.016 | 2.490 | 2.089 | 0.362 | 12.062 |
| Gut microbiota abundance (genus Sutterella id.2896) | Fibromyalgia | Weighted median | 12.000 | 0.110 | 0.197 | 0.576 | -0.276 | 0.497 | 1.116 | 0.759 | 1.643 |
| Gut microbiota abundance (genus Sutterella id.2896) | Fibromyalgia | Inverse variance weighted | 12.000 | -0.004 | 0.204 | 0.986 | -0.404 | 0.397 | 0.996 | 0.667 | 1.488 |
| Gut microbiota abundance (genus Terrisporobacter id.11348) | Fibromyalgia | MR Egger | 5.000 | -0.135 | 0.946 | 0.895 | -1.990 | 1.719 | 0.873 | 0.137 | 5.580 |
| Gut microbiota abundance (genus Terrisporobacter id.11348) | Fibromyalgia | Weighted median | 5.000 | 0.027 | 0.224 | 0.906 | -0.412 | 0.465 | 1.027 | 0.662 | 1.592 |
| Gut microbiota abundance (genus Terrisporobacter id.11348) | Fibromyalgia | Inverse variance weighted | 5.000 | -0.077 | 0.272 | 0.777 | -0.609 | 0.455 | 0.926 | 0.544 | 1.577 |
| Gut microbiota abundance (genus Turicibacter id.2162) | Fibromyalgia | MR Egger | 10.000 | -0.167 | 0.518 | 0.755 | -1.181 | 0.847 | 0.846 | 0.307 | 2.333 |
| Gut microbiota abundance (genus Turicibacter id.2162) | Fibromyalgia | Weighted median | 10.000 | 0.105 | 0.163 | 0.521 | -0.215 | 0.425 | 1.111 | 0.806 | 1.530 |
| Gut microbiota abundance (genus Turicibacter id.2162) | Fibromyalgia | Inverse variance weighted | 10.000 | 0.135 | 0.121 | 0.264 | -0.102 | 0.373 | 1.145 | 0.903 | 1.452 |
| Gut microbiota abundance (genus Tyzzerella3 id.11335) | Fibromyalgia | MR Egger | 13.000 | -0.321 | 0.493 | 0.528 | -1.288 | 0.645 | 0.725 | 0.276 | 1.907 |
| Gut microbiota abundance (genus Tyzzerella3 id.11335) | Fibromyalgia | Weighted median | 13.000 | -0.045 | 0.116 | 0.700 | -0.271 | 0.182 | 0.956 | 0.762 | 1.200 |
| Gut microbiota abundance (genus Tyzzerella3 id.11335) | Fibromyalgia | Inverse variance weighted | 13.000 | 0.005 | 0.086 | 0.956 | -0.163 | 0.173 | 1.005 | 0.849 | 1.189 |
| Gut microbiota abundance (genus Veillonella id.2198) | Fibromyalgia | MR Egger | 6.000 | 0.344 | 1.316 | 0.807 | -2.236 | 2.924 | 1.411 | 0.107 | 18.615 |
| Gut microbiota abundance (genus Veillonella id.2198) | Fibromyalgia | Weighted median | 6.000 | 0.091 | 0.200 | 0.650 | -0.302 | 0.483 | 1.095 | 0.740 | 1.621 |
| Gut microbiota abundance (genus Veillonella id.2198) | Fibromyalgia | Inverse variance weighted | 6.000 | 0.073 | 0.166 | 0.662 | -0.253 | 0.398 | 1.075 | 0.777 | 1.489 |
| Gut microbiota abundance (genus Victivallis id.2256) | Fibromyalgia | MR Egger | 10.000 | -0.390 | 0.606 | 0.538 | -1.577 | 0.798 | 0.677 | 0.207 | 2.220 |
| Gut microbiota abundance (genus Victivallis id.2256) | Fibromyalgia | Weighted median | 10.000 | 0.046 | 0.103 | 0.653 | -0.156 | 0.249 | 1.047 | 0.856 | 1.282 |
| Gut microbiota abundance (genus Victivallis id.2256) | Fibromyalgia | Inverse variance weighted | 10.000 | 0.024 | 0.080 | 0.759 | -0.131 | 0.180 | 1.025 | 0.877 | 1.197 |
| Gut microbiota abundance (order Actinomycetales id.420) | Fibromyalgia | MR Egger | 4.000 | 0.337 | 0.363 | 0.452 | -0.375 | 1.050 | 1.401 | 0.687 | 2.856 |
| Gut microbiota abundance (order Actinomycetales id.420) | Fibromyalgia | Weighted median | 4.000 | 0.039 | 0.190 | 0.837 | -0.333 | 0.411 | 1.040 | 0.717 | 1.509 |
| Gut microbiota abundance (order Actinomycetales id.420) | Fibromyalgia | Inverse variance weighted | 4.000 | -0.004 | 0.167 | 0.980 | -0.331 | 0.323 | 0.996 | 0.718 | 1.381 |
| Gut microbiota abundance (order Bacillales id.1674) | Fibromyalgia | MR Egger | 8.000 | 0.287 | 0.346 | 0.439 | -0.391 | 0.965 | 1.332 | 0.676 | 2.625 |
| Gut microbiota abundance (order Bacillales id.1674) | Fibromyalgia | Weighted median | 8.000 | 0.074 | 0.112 | 0.509 | -0.146 | 0.294 | 1.077 | 0.864 | 1.342 |
| Gut microbiota abundance (order Bacillales id.1674) | Fibromyalgia | Inverse variance weighted | 8.000 | 0.078 | 0.083 | 0.347 | -0.085 | 0.241 | 1.081 | 0.919 | 1.272 |
| Gut microbiota abundance (order Bacteroidales id.913) | Fibromyalgia | MR Egger | 13.000 | 0.124 | 0.304 | 0.692 | -0.473 | 0.720 | 1.132 | 0.623 | 2.055 |
| Gut microbiota abundance (order Bacteroidales id.913) | Fibromyalgia | Weighted median | 13.000 | 0.054 | 0.196 | 0.781 | -0.330 | 0.439 | 1.056 | 0.719 | 1.551 |
| Gut microbiota abundance (order Bacteroidales id.913) | Fibromyalgia | Inverse variance weighted | 13.000 | 0.033 | 0.147 | 0.819 | -0.254 | 0.321 | 1.034 | 0.776 | 1.378 |
| Gut microbiota abundance (order Bifidobacteriales id.432) | Fibromyalgia | MR Egger | 11.000 | -0.110 | 0.438 | 0.806 | -0.968 | 0.747 | 0.895 | 0.380 | 2.111 |
| Gut microbiota abundance (order Bifidobacteriales id.432) | Fibromyalgia | Weighted median | 11.000 | -0.165 | 0.171 | 0.335 | -0.499 | 0.170 | 0.848 | 0.607 | 1.185 |
| Gut microbiota abundance (order Bifidobacteriales id.432) | Fibromyalgia | Inverse variance weighted | 11.000 | -0.145 | 0.134 | 0.280 | -0.407 | 0.118 | 0.865 | 0.665 | 1.125 |
| Gut microbiota abundance (order Burkholderiales id.2874) | Fibromyalgia | MR Egger | 10.000 | 0.139 | 0.524 | 0.798 | -0.888 | 1.165 | 1.149 | 0.412 | 3.206 |
| Gut microbiota abundance (order Burkholderiales id.2874) | Fibromyalgia | Weighted median | 10.000 | 0.108 | 0.224 | 0.631 | -0.332 | 0.548 | 1.114 | 0.718 | 1.729 |
| Gut microbiota abundance (order Burkholderiales id.2874) | Fibromyalgia | Inverse variance weighted | 10.000 | -0.065 | 0.166 | 0.695 | -0.389 | 0.260 | 0.937 | 0.678 | 1.296 |
| Gut microbiota abundance (order Clostridiales id.1863) | Fibromyalgia | MR Egger | 13.000 | -0.142 | 0.417 | 0.740 | -0.959 | 0.676 | 0.868 | 0.383 | 1.965 |
| Gut microbiota abundance (order Clostridiales id.1863) | Fibromyalgia | Weighted median | 13.000 | -0.063 | 0.202 | 0.753 | -0.459 | 0.332 | 0.938 | 0.632 | 1.393 |
| Gut microbiota abundance (order Clostridiales id.1863) | Fibromyalgia | Inverse variance weighted | 13.000 | -0.074 | 0.148 | 0.619 | -0.364 | 0.217 | 0.929 | 0.695 | 1.242 |
| Gut microbiota abundance (order Coriobacteriales id.810) | Fibromyalgia | MR Egger | 14.000 | -0.478 | 0.624 | 0.458 | -1.700 | 0.744 | 0.620 | 0.183 | 2.105 |
| Gut microbiota abundance (order Coriobacteriales id.810) | Fibromyalgia | Weighted median | 14.000 | -0.054 | 0.217 | 0.803 | -0.479 | 0.371 | 0.947 | 0.620 | 1.449 |
| Gut microbiota abundance (order Coriobacteriales id.810) | Fibromyalgia | Inverse variance weighted | 14.000 | 0.021 | 0.150 | 0.892 | -0.274 | 0.315 | 1.021 | 0.760 | 1.371 |
| Gut microbiota abundance (order Desulfovibrionales id.3156) | Fibromyalgia | MR Egger | 12.000 | 0.207 | 0.341 | 0.557 | -0.462 | 0.877 | 1.231 | 0.630 | 2.403 |
| Gut microbiota abundance (order Desulfovibrionales id.3156) | Fibromyalgia | Weighted median | 12.000 | -0.026 | 0.191 | 0.891 | -0.400 | 0.348 | 0.974 | 0.670 | 1.416 |
| Gut microbiota abundance (order Desulfovibrionales id.3156) | Fibromyalgia | Inverse variance weighted | 12.000 | -0.067 | 0.137 | 0.626 | -0.335 | 0.202 | 0.935 | 0.715 | 1.224 |
| Gut microbiota abundance (order Enterobacteriales id.3468) | Fibromyalgia | MR Egger | 7.000 | -0.615 | 1.141 | 0.613 | -2.851 | 1.622 | 0.541 | 0.058 | 5.063 |
| Gut microbiota abundance (order Enterobacteriales id.3468) | Fibromyalgia | Weighted median | 7.000 | -0.317 | 0.238 | 0.183 | -0.784 | 0.150 | 0.728 | 0.456 | 1.162 |
| Gut microbiota abundance (order Enterobacteriales id.3468) | Fibromyalgia | Inverse variance weighted | 7.000 | -0.389 | 0.191 | 0.041 | -0.763 | -0.015 | 0.677 | 0.466 | 0.985 |
| Gut microbiota abundance (order Erysipelotrichales id.2148) | Fibromyalgia | MR Egger | 13.000 | -0.414 | 0.690 | 0.561 | -1.766 | 0.938 | 0.661 | 0.171 | 2.555 |
| Gut microbiota abundance (order Erysipelotrichales id.2148) | Fibromyalgia | Weighted median | 13.000 | 0.216 | 0.203 | 0.287 | -0.182 | 0.613 | 1.241 | 0.834 | 1.847 |
| Gut microbiota abundance (order Erysipelotrichales id.2148) | Fibromyalgia | Inverse variance weighted | 13.000 | 0.092 | 0.159 | 0.565 | -0.220 | 0.404 | 1.096 | 0.802 | 1.497 |
| Gut microbiota abundance (order Gastranaerophilales id.1591) | Fibromyalgia | MR Egger | 9.000 | 0.267 | 0.321 | 0.434 | -0.363 | 0.896 | 1.306 | 0.696 | 2.451 |
| Gut microbiota abundance (order Gastranaerophilales id.1591) | Fibromyalgia | Weighted median | 9.000 | 0.106 | 0.142 | 0.456 | -0.172 | 0.383 | 1.111 | 0.842 | 1.467 |
| Gut microbiota abundance (order Gastranaerophilales id.1591) | Fibromyalgia | Inverse variance weighted | 9.000 | 0.078 | 0.107 | 0.466 | -0.132 | 0.288 | 1.081 | 0.876 | 1.334 |
| Gut microbiota abundance (order Lactobacillales id.1800) | Fibromyalgia | MR Egger | 15.000 | -0.553 | 0.355 | 0.143 | -1.249 | 0.142 | 0.575 | 0.287 | 1.153 |
| Gut microbiota abundance (order Lactobacillales id.1800) | Fibromyalgia | Weighted median | 15.000 | -0.114 | 0.185 | 0.537 | -0.477 | 0.249 | 0.892 | 0.621 | 1.282 |
| Gut microbiota abundance (order Lactobacillales id.1800) | Fibromyalgia | Inverse variance weighted | 15.000 | -0.039 | 0.137 | 0.777 | -0.306 | 0.229 | 0.962 | 0.736 | 1.257 |
| Gut microbiota abundance (order Methanobacteriales id.120) | Fibromyalgia | MR Egger | 10.000 | -0.125 | 0.368 | 0.742 | -0.846 | 0.595 | 0.882 | 0.429 | 1.814 |
| Gut microbiota abundance (order Methanobacteriales id.120) | Fibromyalgia | Weighted median | 10.000 | -0.021 | 0.109 | 0.845 | -0.235 | 0.192 | 0.979 | 0.791 | 1.212 |
| Gut microbiota abundance (order Methanobacteriales id.120) | Fibromyalgia | Inverse variance weighted | 10.000 | -0.020 | 0.084 | 0.817 | -0.185 | 0.146 | 0.981 | 0.831 | 1.157 |
| Gut microbiota abundance (order Mollicutes RF9 id.11579) | Fibromyalgia | MR Egger | 13.000 | -0.210 | 0.362 | 0.573 | -0.920 | 0.500 | 0.810 | 0.398 | 1.648 |
| Gut microbiota abundance (order Mollicutes RF9 id.11579) | Fibromyalgia | Weighted median | 13.000 | 0.089 | 0.154 | 0.564 | -0.213 | 0.390 | 1.093 | 0.808 | 1.477 |
| Gut microbiota abundance (order Mollicutes RF9 id.11579) | Fibromyalgia | Inverse variance weighted | 13.000 | 0.061 | 0.115 | 0.596 | -0.165 | 0.287 | 1.063 | 0.848 | 1.333 |
| Gut microbiota abundance (order NB1n id.3953) | Fibromyalgia | MR Egger | 12.000 | 0.410 | 0.345 | 0.262 | -0.265 | 1.085 | 1.507 | 0.767 | 2.960 |
| Gut microbiota abundance (order NB1n id.3953) | Fibromyalgia | Weighted median | 12.000 | 0.197 | 0.110 | 0.073 | -0.018 | 0.412 | 1.218 | 0.982 | 1.510 |
| Gut microbiota abundance (order NB1n id.3953) | Fibromyalgia | Inverse variance weighted | 12.000 | 0.091 | 0.085 | 0.285 | -0.076 | 0.257 | 1.095 | 0.927 | 1.293 |
| Gut microbiota abundance (order Pasteurellales id.3688) | Fibromyalgia | MR Egger | 14.000 | 0.046 | 0.253 | 0.858 | -0.450 | 0.543 | 1.048 | 0.637 | 1.721 |
| Gut microbiota abundance (order Pasteurellales id.3688) | Fibromyalgia | Weighted median | 14.000 | 0.048 | 0.141 | 0.734 | -0.228 | 0.324 | 1.049 | 0.796 | 1.382 |
| Gut microbiota abundance (order Pasteurellales id.3688) | Fibromyalgia | Inverse variance weighted | 14.000 | -0.029 | 0.113 | 0.799 | -0.249 | 0.192 | 0.972 | 0.779 | 1.211 |
| Gut microbiota abundance (order Rhodospirillales id.2667) | Fibromyalgia | MR Egger | 14.000 | 0.172 | 0.395 | 0.672 | -0.602 | 0.945 | 1.187 | 0.548 | 2.573 |
| Gut microbiota abundance (order Rhodospirillales id.2667) | Fibromyalgia | Weighted median | 14.000 | 0.039 | 0.137 | 0.776 | -0.230 | 0.308 | 1.040 | 0.794 | 1.361 |
| Gut microbiota abundance (order Rhodospirillales id.2667) | Fibromyalgia | Inverse variance weighted | 14.000 | 0.062 | 0.098 | 0.526 | -0.130 | 0.254 | 1.064 | 0.878 | 1.290 |
| Gut microbiota abundance (order Selenomonadales id.2165) | Fibromyalgia | MR Egger | 12.000 | 0.385 | 0.726 | 0.607 | -1.038 | 1.809 | 1.470 | 0.354 | 6.102 |
| Gut microbiota abundance (order Selenomonadales id.2165) | Fibromyalgia | Weighted median | 12.000 | 0.133 | 0.236 | 0.574 | -0.330 | 0.595 | 1.142 | 0.719 | 1.812 |
| Gut microbiota abundance (order Selenomonadales id.2165) | Fibromyalgia | Inverse variance weighted | 12.000 | 0.163 | 0.202 | 0.420 | -0.232 | 0.558 | 1.177 | 0.793 | 1.746 |
| Gut microbiota abundance (order Verrucomicrobiales id.4030) | Fibromyalgia | MR Egger | 11.000 | 0.683 | 0.471 | 0.181 | -0.241 | 1.606 | 1.979 | 0.786 | 4.983 |
| Gut microbiota abundance (order Verrucomicrobiales id.4030) | Fibromyalgia | Weighted median | 11.000 | 0.223 | 0.189 | 0.238 | -0.147 | 0.593 | 1.250 | 0.863 | 1.810 |
| Gut microbiota abundance (order Verrucomicrobiales id.4030) | Fibromyalgia | Inverse variance weighted | 11.000 | 0.065 | 0.144 | 0.654 | -0.218 | 0.347 | 1.067 | 0.804 | 1.415 |
| Gut microbiota abundance (order Victivallales id.2254) | Fibromyalgia | MR Egger | 8.000 | -0.327 | 0.361 | 0.400 | -1.034 | 0.380 | 0.721 | 0.355 | 1.462 |
| Gut microbiota abundance (order Victivallales id.2254) | Fibromyalgia | Weighted median | 8.000 | -0.025 | 0.122 | 0.837 | -0.264 | 0.214 | 0.975 | 0.768 | 1.238 |
| Gut microbiota abundance (order Victivallales id.2254) | Fibromyalgia | Inverse variance weighted | 8.000 | -0.039 | 0.101 | 0.698 | -0.238 | 0.159 | 0.961 | 0.788 | 1.173 |
| Gut microbiota abundance (phylum Actinobacteria id.400) | Fibromyalgia | MR Egger | 15.000 | -0.455 | 0.651 | 0.497 | -1.731 | 0.821 | 0.635 | 0.177 | 2.274 |
| Gut microbiota abundance (phylum Actinobacteria id.400) | Fibromyalgia | Weighted median | 15.000 | -0.092 | 0.193 | 0.632 | -0.471 | 0.286 | 0.912 | 0.624 | 1.331 |
| Gut microbiota abundance (phylum Actinobacteria id.400) | Fibromyalgia | Inverse variance weighted | 15.000 | -0.104 | 0.150 | 0.485 | -0.398 | 0.189 | 0.901 | 0.672 | 1.208 |
| Gut microbiota abundance (phylum Bacteroidetes id.905) | Fibromyalgia | MR Egger | 10.000 | 0.477 | 0.490 | 0.359 | -0.483 | 1.438 | 1.612 | 0.617 | 4.211 |
| Gut microbiota abundance (phylum Bacteroidetes id.905) | Fibromyalgia | Weighted median | 10.000 | 0.061 | 0.247 | 0.804 | -0.423 | 0.545 | 1.063 | 0.655 | 1.725 |
| Gut microbiota abundance (phylum Bacteroidetes id.905) | Fibromyalgia | Inverse variance weighted | 10.000 | -0.112 | 0.232 | 0.630 | -0.567 | 0.343 | 0.894 | 0.567 | 1.409 |
| Gut microbiota abundance (phylum Cyanobacteria id.1500) | Fibromyalgia | MR Egger | 8.000 | -0.759 | 0.436 | 0.132 | -1.613 | 0.096 | 0.468 | 0.199 | 1.100 |
| Gut microbiota abundance (phylum Cyanobacteria id.1500) | Fibromyalgia | Weighted median | 8.000 | -0.187 | 0.161 | 0.246 | -0.504 | 0.129 | 0.829 | 0.604 | 1.138 |
| Gut microbiota abundance (phylum Cyanobacteria id.1500) | Fibromyalgia | Inverse variance weighted | 8.000 | -0.157 | 0.122 | 0.199 | -0.396 | 0.082 | 0.855 | 0.673 | 1.086 |
| Gut microbiota abundance (phylum Euryarchaeota id.55) | Fibromyalgia | MR Egger | 12.000 | 0.435 | 0.327 | 0.213 | -0.207 | 1.077 | 1.545 | 0.813 | 2.935 |
| Gut microbiota abundance (phylum Euryarchaeota id.55) | Fibromyalgia | Weighted median | 12.000 | 0.002 | 0.094 | 0.986 | -0.183 | 0.186 | 1.002 | 0.833 | 1.205 |
| Gut microbiota abundance (phylum Euryarchaeota id.55) | Fibromyalgia | Inverse variance weighted | 12.000 | -0.011 | 0.074 | 0.877 | -0.156 | 0.133 | 0.989 | 0.856 | 1.142 |
| Gut microbiota abundance (phylum Firmicutes id.1672) | Fibromyalgia | MR Egger | 16.000 | -0.229 | 0.299 | 0.457 | -0.815 | 0.357 | 0.795 | 0.442 | 1.430 |
| Gut microbiota abundance (phylum Firmicutes id.1672) | Fibromyalgia | Weighted median | 16.000 | -0.133 | 0.173 | 0.440 | -0.472 | 0.205 | 0.875 | 0.624 | 1.228 |
| Gut microbiota abundance (phylum Firmicutes id.1672) | Fibromyalgia | Inverse variance weighted | 16.000 | -0.053 | 0.126 | 0.674 | -0.299 | 0.194 | 0.949 | 0.741 | 1.214 |
| Gut microbiota abundance (phylum Lentisphaerae id.2238) | Fibromyalgia | MR Egger | 9.000 | -0.281 | 0.362 | 0.462 | -0.990 | 0.428 | 0.755 | 0.371 | 1.534 |
| Gut microbiota abundance (phylum Lentisphaerae id.2238) | Fibromyalgia | Weighted median | 9.000 | -0.007 | 0.122 | 0.953 | -0.246 | 0.232 | 0.993 | 0.782 | 1.261 |
| Gut microbiota abundance (phylum Lentisphaerae id.2238) | Fibromyalgia | Inverse variance weighted | 9.000 | -0.016 | 0.095 | 0.865 | -0.202 | 0.170 | 0.984 | 0.817 | 1.185 |
| Gut microbiota abundance (phylum Proteobacteria id.2375) | Fibromyalgia | MR Egger | 12.000 | -0.356 | 0.428 | 0.425 | -1.195 | 0.484 | 0.701 | 0.303 | 1.622 |
| Gut microbiota abundance (phylum Proteobacteria id.2375) | Fibromyalgia | Weighted median | 12.000 | 0.056 | 0.205 | 0.785 | -0.345 | 0.457 | 1.058 | 0.708 | 1.580 |
| Gut microbiota abundance (phylum Proteobacteria id.2375) | Fibromyalgia | Inverse variance weighted | 12.000 | 0.024 | 0.154 | 0.874 | -0.277 | 0.326 | 1.025 | 0.758 | 1.385 |
| Gut microbiota abundance (phylum Tenericutes id.3919) | Fibromyalgia | MR Egger | 12.000 | -0.056 | 0.440 | 0.901 | -0.920 | 0.807 | 0.945 | 0.399 | 2.241 |
| Gut microbiota abundance (phylum Tenericutes id.3919) | Fibromyalgia | Weighted median | 12.000 | -0.106 | 0.177 | 0.551 | -0.454 | 0.242 | 0.900 | 0.635 | 1.274 |
| Gut microbiota abundance (phylum Tenericutes id.3919) | Fibromyalgia | Inverse variance weighted | 12.000 | -0.171 | 0.126 | 0.174 | -0.417 | 0.075 | 0.843 | 0.659 | 1.078 |
| Gut microbiota abundance (phylum Verrucomicrobia id.3982) | Fibromyalgia | MR Egger | 12.000 | 0.674 | 0.332 | 0.070 | 0.023 | 1.325 | 1.962 | 1.023 | 3.761 |
| Gut microbiota abundance (phylum Verrucomicrobia id.3982) | Fibromyalgia | Weighted median | 12.000 | 0.304 | 0.177 | 0.086 | -0.043 | 0.651 | 1.355 | 0.958 | 1.918 |
| Gut microbiota abundance (phylum Verrucomicrobia id.3982) | Fibromyalgia | Inverse variance weighted | 12.000 | 0.093 | 0.132 | 0.480 | -0.166 | 0.352 | 1.098 | 0.847 | 1.422 |

| **Supplementary Table 2: sensitivity analysis results of gut microbiota with significant MR analysis results and fibromyalgia (preliminary analysis cohort)** | | | | |
| --- | --- | --- | --- | --- |
| **Exposure** | **Outcome** | **Cochran Q (P value)** | **MR-Egger intercept (P value)** | **MR-PRESSO (P value) in the global heterogeneity test** |
| Gut microbiota abundance (family Enterobacteriaceae id.3469) | Fibromyalgia | 0.919 | 0.849 | 0.905 |
| Gut microbiota abundance (genus Butyricicoccus id.2055) | Fibromyalgia | 0.531 | 0.594 | 0.618 |
| Gut microbiota abundance (genus Coprococcus1 id.11301) | Fibromyalgia | 0.498 | 0.200 | 0.468 |
| Gut microbiota abundance (genus Eggerthella id.819) | Fibromyalgia | 0.621 | 0.970 | 0.686 |
| Gut microbiota abundance (genus Ruminococcaceae UCG005 id.11363) | Fibromyalgia | 0.211 | 0.632 | 0.256 |
| Gut microbiota abundance (order Enterobacteriales id.3468) | Fibromyalgia | 0.919 | 0.849 | 0.917 |

| **Supplementary Table 3: MR analysis results of inflammatory protein and fibromyalgia (preliminary analysis cohort)** | | | | | | | | | | | |
| --- | --- | --- | --- | --- | --- | --- | --- | --- | --- | --- | --- |
| **Exposure** | **Outcome** | **Method** | **Nsnp** | **b** | **se** | **pval** | **lo_ci** | **up_ci** | **or** | **or_lci95** | **or_uci95** |
| Eukaryotic translation initiation factor 4E-binding protein 1 levels | Fibromyalgia | MR Egger | 11.000 | 0.373 | 0.290 | 0.230 | -0.195 | 0.942 | 1.453 | 0.823 | 2.565 |
| Eukaryotic translation initiation factor 4E-binding protein 1 levels | Fibromyalgia | Weighted median | 11.000 | 0.110 | 0.163 | 0.498 | -0.209 | 0.429 | 1.117 | 0.812 | 1.536 |
| Eukaryotic translation initiation factor 4E-binding protein 1 levels | Fibromyalgia | Inverse variance weighted | 11.000 | 0.063 | 0.116 | 0.586 | -0.165 | 0.291 | 1.065 | 0.848 | 1.338 |
| Adenosine Deaminase levels | Fibromyalgia | MR Egger | 14.000 | -0.056 | 0.073 | 0.452 | -0.199 | 0.086 | 0.945 | 0.820 | 1.090 |
| Adenosine Deaminase levels | Fibromyalgia | Weighted median | 14.000 | -0.007 | 0.067 | 0.912 | -0.139 | 0.124 | 0.993 | 0.871 | 1.132 |
| Adenosine Deaminase levels | Fibromyalgia | Inverse variance weighted | 14.000 | -0.027 | 0.058 | 0.641 | -0.140 | 0.086 | 0.974 | 0.870 | 1.090 |
| Artemin levels | Fibromyalgia | MR Egger | 17.000 | -0.226 | 0.264 | 0.406 | -0.744 | 0.292 | 0.798 | 0.475 | 1.339 |
| Artemin levels | Fibromyalgia | Weighted median | 17.000 | 0.029 | 0.145 | 0.839 | -0.254 | 0.313 | 1.030 | 0.776 | 1.367 |
| Artemin levels | Fibromyalgia | Inverse variance weighted | 17.000 | -0.050 | 0.104 | 0.632 | -0.253 | 0.153 | 0.952 | 0.777 | 1.166 |
| Axin-1 levels | Fibromyalgia | MR Egger | 8.000 | 0.742 | 0.476 | 0.170 | -0.191 | 1.675 | 2.099 | 0.826 | 5.337 |
| Axin-1 levels | Fibromyalgia | Weighted median | 8.000 | 0.270 | 0.233 | 0.246 | -0.186 | 0.726 | 1.310 | 0.830 | 2.066 |
| Axin-1 levels | Fibromyalgia | Inverse variance weighted | 8.000 | 0.301 | 0.199 | 0.130 | -0.088 | 0.691 | 1.351 | 0.915 | 1.995 |
| beta-nerve growth factor levels | Fibromyalgia | MR Egger | 21.000 | -0.061 | 0.374 | 0.871 | -0.795 | 0.672 | 0.940 | 0.452 | 1.958 |
| beta-nerve growth factor levels | Fibromyalgia | Weighted median | 21.000 | 0.017 | 0.152 | 0.911 | -0.280 | 0.314 | 1.017 | 0.755 | 1.369 |
| beta-nerve growth factor levels | Fibromyalgia | Inverse variance weighted | 21.000 | -0.010 | 0.141 | 0.944 | -0.286 | 0.266 | 0.990 | 0.752 | 1.305 |
| Caspase 8 levels | Fibromyalgia | MR Egger | 14.000 | -0.089 | 0.189 | 0.646 | -0.460 | 0.282 | 0.915 | 0.631 | 1.325 |
| Caspase 8 levels | Fibromyalgia | Weighted median | 14.000 | 0.122 | 0.150 | 0.416 | -0.172 | 0.415 | 1.129 | 0.842 | 1.514 |
| Caspase 8 levels | Fibromyalgia | Inverse variance weighted | 14.000 | 0.124 | 0.105 | 0.239 | -0.082 | 0.331 | 1.132 | 0.921 | 1.392 |
| Eotaxin levels | Fibromyalgia | MR Egger | 19.000 | 0.065 | 0.175 | 0.717 | -0.279 | 0.408 | 1.067 | 0.756 | 1.504 |
| Eotaxin levels | Fibromyalgia | Weighted median | 19.000 | 0.033 | 0.119 | 0.781 | -0.200 | 0.266 | 1.034 | 0.819 | 1.304 |
| Eotaxin levels | Fibromyalgia | Inverse variance weighted | 19.000 | -0.023 | 0.087 | 0.791 | -0.193 | 0.147 | 0.977 | 0.824 | 1.159 |
| C-C motif chemokine 19 levels | Fibromyalgia | MR Egger | 20.000 | 0.089 | 0.121 | 0.471 | -0.149 | 0.327 | 1.093 | 0.862 | 1.387 |
| C-C motif chemokine 19 levels | Fibromyalgia | Weighted median | 20.000 | 0.065 | 0.086 | 0.454 | -0.105 | 0.234 | 1.067 | 0.901 | 1.264 |
| C-C motif chemokine 19 levels | Fibromyalgia | Inverse variance weighted | 20.000 | 0.010 | 0.080 | 0.904 | -0.147 | 0.167 | 1.010 | 0.863 | 1.181 |
| C-C motif chemokine 20 levels | Fibromyalgia | MR Egger | 22.000 | 0.041 | 0.338 | 0.905 | -0.622 | 0.704 | 1.042 | 0.537 | 2.021 |
| C-C motif chemokine 20 levels | Fibromyalgia | Weighted median | 22.000 | 0.003 | 0.151 | 0.986 | -0.293 | 0.298 | 1.003 | 0.746 | 1.347 |
| C-C motif chemokine 20 levels | Fibromyalgia | Inverse variance weighted | 22.000 | 0.127 | 0.128 | 0.321 | -0.124 | 0.377 | 1.135 | 0.884 | 1.458 |
| C-C motif chemokine 23 levels | Fibromyalgia | MR Egger | 22.000 | -0.144 | 0.088 | 0.119 | -0.316 | 0.029 | 0.866 | 0.729 | 1.030 |
| C-C motif chemokine 23 levels | Fibromyalgia | Weighted median | 22.000 | -0.063 | 0.078 | 0.422 | -0.216 | 0.091 | 0.939 | 0.806 | 1.095 |
| C-C motif chemokine 23 levels | Fibromyalgia | Inverse variance weighted | 22.000 | -0.052 | 0.063 | 0.408 | -0.176 | 0.071 | 0.949 | 0.839 | 1.074 |
| C-C motif chemokine 25 levels | Fibromyalgia | MR Egger | 24.000 | 0.029 | 0.058 | 0.618 | -0.085 | 0.143 | 1.030 | 0.919 | 1.154 |
| C-C motif chemokine 25 levels | Fibromyalgia | Weighted median | 24.000 | 0.046 | 0.043 | 0.289 | -0.039 | 0.131 | 1.047 | 0.962 | 1.139 |
| C-C motif chemokine 25 levels | Fibromyalgia | Inverse variance weighted | 24.000 | 0.019 | 0.044 | 0.666 | -0.067 | 0.105 | 1.019 | 0.935 | 1.111 |
| C-C motif chemokine 28 levels | Fibromyalgia | MR Egger | 20.000 | 0.301 | 0.247 | 0.239 | -0.183 | 0.784 | 1.351 | 0.833 | 2.191 |
| C-C motif chemokine 28 levels | Fibromyalgia | Weighted median | 20.000 | 0.061 | 0.152 | 0.689 | -0.237 | 0.358 | 1.062 | 0.789 | 1.430 |
| C-C motif chemokine 28 levels | Fibromyalgia | Inverse variance weighted | 20.000 | 0.108 | 0.116 | 0.353 | -0.119 | 0.334 | 1.114 | 0.888 | 1.397 |
| C-C motif chemokine 4 levels | Fibromyalgia | MR Egger | 18.000 | -0.105 | 0.080 | 0.207 | -0.262 | 0.052 | 0.900 | 0.769 | 1.053 |
| C-C motif chemokine 4 levels | Fibromyalgia | Weighted median | 18.000 | -0.089 | 0.057 | 0.119 | -0.201 | 0.023 | 0.915 | 0.818 | 1.023 |
| C-C motif chemokine 4 levels | Fibromyalgia | Inverse variance weighted | 18.000 | -0.069 | 0.054 | 0.197 | -0.175 | 0.036 | 0.933 | 0.840 | 1.037 |
| Natural killer cell receptor 2B4 levels | Fibromyalgia | MR Egger | 21.000 | 0.321 | 0.166 | 0.069 | -0.005 | 0.646 | 1.378 | 0.995 | 1.908 |
| Natural killer cell receptor 2B4 levels | Fibromyalgia | Weighted median | 21.000 | 0.230 | 0.108 | 0.033 | 0.019 | 0.442 | 1.259 | 1.019 | 1.555 |
| Natural killer cell receptor 2B4 levels | Fibromyalgia | Inverse variance weighted | 21.000 | 0.169 | 0.078 | 0.031 | 0.016 | 0.322 | 1.184 | 1.016 | 1.380 |
| CD40L receptor levels | Fibromyalgia | MR Egger | 15.000 | -0.102 | 0.081 | 0.232 | -0.261 | 0.057 | 0.903 | 0.770 | 1.059 |
| CD40L receptor levels | Fibromyalgia | Weighted median | 15.000 | -0.089 | 0.065 | 0.174 | -0.216 | 0.039 | 0.915 | 0.805 | 1.040 |
| CD40L receptor levels | Fibromyalgia | Inverse variance weighted | 15.000 | -0.068 | 0.059 | 0.245 | -0.183 | 0.047 | 0.934 | 0.833 | 1.048 |
| T-cell surface glycoprotein CD5 levels | Fibromyalgia | MR Egger | 21.000 | 0.289 | 0.225 | 0.216 | -0.153 | 0.731 | 1.335 | 0.858 | 2.076 |
| T-cell surface glycoprotein CD5 levels | Fibromyalgia | Weighted median | 21.000 | 0.062 | 0.112 | 0.578 | -0.157 | 0.281 | 1.064 | 0.855 | 1.325 |
| T-cell surface glycoprotein CD5 levels | Fibromyalgia | Inverse variance weighted | 21.000 | 0.000 | 0.084 | 0.996 | -0.163 | 0.164 | 1.000 | 0.849 | 1.178 |
| T-cell surface glycoprotein CD6 isoform levels | Fibromyalgia | MR Egger | 18.000 | -0.033 | 0.086 | 0.706 | -0.201 | 0.135 | 0.968 | 0.818 | 1.144 |
| T-cell surface glycoprotein CD6 isoform levels | Fibromyalgia | Weighted median | 18.000 | 0.001 | 0.063 | 0.981 | -0.121 | 0.124 | 1.001 | 0.886 | 1.132 |
| T-cell surface glycoprotein CD6 isoform levels | Fibromyalgia | Inverse variance weighted | 18.000 | 0.009 | 0.051 | 0.864 | -0.091 | 0.109 | 1.009 | 0.913 | 1.115 |
| CUB domain-containing protein 1 levels | Fibromyalgia | MR Egger | 25.000 | 0.166 | 0.107 | 0.135 | -0.044 | 0.375 | 1.180 | 0.957 | 1.455 |
| CUB domain-containing protein 1 levels | Fibromyalgia | Weighted median | 25.000 | 0.249 | 0.090 | 0.006 | 0.072 | 0.426 | 1.283 | 1.075 | 1.531 |
| CUB domain-containing protein 1 levels | Fibromyalgia | Inverse variance weighted | 25.000 | 0.169 | 0.062 | 0.006 | 0.048 | 0.289 | 1.184 | 1.049 | 1.336 |
| Macrophage colony-stimulating factor 1 levels | Fibromyalgia | MR Egger | 16.000 | 0.312 | 0.246 | 0.226 | -0.171 | 0.795 | 1.366 | 0.843 | 2.214 |
| Macrophage colony-stimulating factor 1 levels | Fibromyalgia | Weighted median | 16.000 | 0.067 | 0.142 | 0.634 | -0.210 | 0.345 | 1.070 | 0.810 | 1.412 |
| Macrophage colony-stimulating factor 1 levels | Fibromyalgia | Inverse variance weighted | 16.000 | 0.037 | 0.098 | 0.710 | -0.156 | 0.229 | 1.037 | 0.856 | 1.257 |
| Cystatin D levels | Fibromyalgia | MR Egger | 30.000 | -0.042 | 0.062 | 0.498 | -0.164 | 0.079 | 0.958 | 0.849 | 1.082 |
| Cystatin D levels | Fibromyalgia | Weighted median | 30.000 | -0.007 | 0.055 | 0.900 | -0.116 | 0.102 | 0.993 | 0.891 | 1.107 |
| Cystatin D levels | Fibromyalgia | Inverse variance weighted | 30.000 | -0.005 | 0.047 | 0.907 | -0.097 | 0.087 | 0.995 | 0.907 | 1.090 |
| Fractalkine levels | Fibromyalgia | MR Egger | 21.000 | -0.207 | 0.313 | 0.516 | -0.820 | 0.406 | 0.813 | 0.440 | 1.500 |
| Fractalkine levels | Fibromyalgia | Weighted median | 21.000 | 0.038 | 0.145 | 0.795 | -0.247 | 0.322 | 1.038 | 0.781 | 1.380 |
| Fractalkine levels | Fibromyalgia | Inverse variance weighted | 21.000 | 0.081 | 0.121 | 0.500 | -0.155 | 0.318 | 1.085 | 0.856 | 1.375 |
| C-X-C motif chemokine 1 levels | Fibromyalgia | MR Egger | 9.000 | -0.078 | 0.140 | 0.596 | -0.352 | 0.196 | 0.925 | 0.704 | 1.217 |
| C-X-C motif chemokine 1 levels | Fibromyalgia | Weighted median | 9.000 | 0.007 | 0.103 | 0.948 | -0.195 | 0.209 | 1.007 | 0.823 | 1.232 |
| C-X-C motif chemokine 1 levels | Fibromyalgia | Inverse variance weighted | 9.000 | 0.010 | 0.091 | 0.916 | -0.168 | 0.187 | 1.010 | 0.845 | 1.206 |
| C-X-C motif chemokine 10 levels | Fibromyalgia | MR Egger | 23.000 | -0.104 | 0.148 | 0.490 | -0.393 | 0.186 | 0.901 | 0.675 | 1.204 |
| C-X-C motif chemokine 10 levels | Fibromyalgia | Weighted median | 23.000 | -0.082 | 0.115 | 0.474 | -0.307 | 0.143 | 0.921 | 0.736 | 1.153 |
| C-X-C motif chemokine 10 levels | Fibromyalgia | Inverse variance weighted | 23.000 | -0.060 | 0.082 | 0.460 | -0.221 | 0.100 | 0.941 | 0.802 | 1.105 |
| C-X-C motif chemokine 11 levels | Fibromyalgia | MR Egger | 22.000 | 0.323 | 0.220 | 0.158 | -0.108 | 0.755 | 1.381 | 0.897 | 2.127 |
| C-X-C motif chemokine 11 levels | Fibromyalgia | Weighted median | 22.000 | 0.101 | 0.128 | 0.430 | -0.150 | 0.353 | 1.107 | 0.860 | 1.423 |
| C-X-C motif chemokine 11 levels | Fibromyalgia | Inverse variance weighted | 22.000 | 0.052 | 0.085 | 0.545 | -0.115 | 0.218 | 1.053 | 0.891 | 1.244 |
| C-X-C motif chemokine 5 levels | Fibromyalgia | MR Egger | 14.000 | -0.082 | 0.099 | 0.426 | -0.277 | 0.113 | 0.921 | 0.758 | 1.119 |
| C-X-C motif chemokine 5 levels | Fibromyalgia | Weighted median | 14.000 | -0.106 | 0.078 | 0.175 | -0.259 | 0.047 | 0.899 | 0.772 | 1.048 |
| C-X-C motif chemokine 5 levels | Fibromyalgia | Inverse variance weighted | 14.000 | -0.123 | 0.063 | 0.052 | -0.248 | 0.001 | 0.884 | 0.781 | 1.001 |
| C-X-C motif chemokine 6 levels | Fibromyalgia | MR Egger | 13.000 | 0.155 | 0.251 | 0.550 | -0.337 | 0.647 | 1.168 | 0.714 | 1.909 |
| C-X-C motif chemokine 6 levels | Fibromyalgia | Weighted median | 13.000 | 0.084 | 0.146 | 0.568 | -0.204 | 0.371 | 1.087 | 0.816 | 1.449 |
| C-X-C motif chemokine 6 levels | Fibromyalgia | Inverse variance weighted | 13.000 | 0.094 | 0.115 | 0.416 | -0.132 | 0.320 | 1.098 | 0.876 | 1.377 |
| C-X-C motif chemokine 9 levels | Fibromyalgia | MR Egger | 21.000 | 0.030 | 0.209 | 0.886 | -0.380 | 0.441 | 1.031 | 0.684 | 1.554 |
| C-X-C motif chemokine 9 levels | Fibromyalgia | Weighted median | 21.000 | 0.052 | 0.131 | 0.688 | -0.203 | 0.308 | 1.054 | 0.816 | 1.361 |
| C-X-C motif chemokine 9 levels | Fibromyalgia | Inverse variance weighted | 21.000 | 0.064 | 0.089 | 0.476 | -0.111 | 0.238 | 1.066 | 0.895 | 1.269 |
| Delta and Notch-like epidermal growth factor-related receptor levels | Fibromyalgia | MR Egger | 16.000 | -0.078 | 0.199 | 0.701 | -0.468 | 0.312 | 0.925 | 0.626 | 1.366 |
| Delta and Notch-like epidermal growth factor-related receptor levels | Fibromyalgia | Weighted median | 16.000 | -0.040 | 0.116 | 0.730 | -0.267 | 0.187 | 0.961 | 0.766 | 1.206 |
| Delta and Notch-like epidermal growth factor-related receptor levels | Fibromyalgia | Inverse variance weighted | 16.000 | 0.000 | 0.087 | 0.999 | -0.171 | 0.171 | 1.000 | 0.843 | 1.186 |
| Protein S100-A12 levels | Fibromyalgia | MR Egger | 15.000 | -0.207 | 0.260 | 0.440 | -0.715 | 0.302 | 0.813 | 0.489 | 1.353 |
| Protein S100-A12 levels | Fibromyalgia | Weighted median | 15.000 | -0.454 | 0.143 | 0.001 | -0.734 | -0.174 | 0.635 | 0.480 | 0.840 |
| Protein S100-A12 levels | Fibromyalgia | Inverse variance weighted | 15.000 | -0.252 | 0.121 | 0.037 | -0.490 | -0.015 | 0.777 | 0.613 | 0.985 |
| Fibroblast growth factor 19 levels | Fibromyalgia | MR Egger | 21.000 | -0.164 | 0.210 | 0.446 | -0.576 | 0.249 | 0.849 | 0.562 | 1.282 |
| Fibroblast growth factor 19 levels | Fibromyalgia | Weighted median | 21.000 | -0.059 | 0.116 | 0.615 | -0.287 | 0.169 | 0.943 | 0.751 | 1.185 |
| Fibroblast growth factor 19 levels | Fibromyalgia | Inverse variance weighted | 21.000 | 0.004 | 0.086 | 0.963 | -0.164 | 0.172 | 1.004 | 0.849 | 1.188 |
| Fibroblast growth factor 21 levels | Fibromyalgia | MR Egger | 14.000 | -0.086 | 0.236 | 0.723 | -0.549 | 0.378 | 0.918 | 0.578 | 1.459 |
| Fibroblast growth factor 21 levels | Fibromyalgia | Weighted median | 14.000 | 0.105 | 0.131 | 0.419 | -0.150 | 0.361 | 1.111 | 0.860 | 1.435 |
| Fibroblast growth factor 21 levels | Fibromyalgia | Inverse variance weighted | 14.000 | 0.073 | 0.098 | 0.457 | -0.119 | 0.265 | 1.076 | 0.888 | 1.303 |
| Fibroblast growth factor 23 levels | Fibromyalgia | MR Egger | 15.000 | 0.543 | 0.348 | 0.143 | -0.140 | 1.226 | 1.721 | 0.870 | 3.407 |
| Fibroblast growth factor 23 levels | Fibromyalgia | Weighted median | 15.000 | 0.070 | 0.161 | 0.662 | -0.245 | 0.386 | 1.073 | 0.783 | 1.470 |
| Fibroblast growth factor 23 levels | Fibromyalgia | Inverse variance weighted | 15.000 | -0.012 | 0.119 | 0.919 | -0.246 | 0.221 | 0.988 | 0.782 | 1.248 |
| Fibroblast growth factor 5 levels | Fibromyalgia | MR Egger | 23.000 | 0.023 | 0.066 | 0.732 | -0.107 | 0.153 | 1.023 | 0.899 | 1.165 |
| Fibroblast growth factor 5 levels | Fibromyalgia | Weighted median | 23.000 | 0.013 | 0.054 | 0.811 | -0.092 | 0.118 | 1.013 | 0.912 | 1.125 |
| Fibroblast growth factor 5 levels | Fibromyalgia | Inverse variance weighted | 23.000 | 0.013 | 0.046 | 0.773 | -0.077 | 0.103 | 1.013 | 0.926 | 1.109 |
| Fms-related tyrosine kinase 3 ligand levels | Fibromyalgia | MR Egger | 29.000 | -0.008 | 0.113 | 0.941 | -0.229 | 0.212 | 0.992 | 0.795 | 1.236 |
| Fms-related tyrosine kinase 3 ligand levels | Fibromyalgia | Weighted median | 29.000 | 0.024 | 0.098 | 0.804 | -0.167 | 0.216 | 1.025 | 0.846 | 1.241 |
| Fms-related tyrosine kinase 3 ligand levels | Fibromyalgia | Inverse variance weighted | 29.000 | -0.001 | 0.066 | 0.991 | -0.131 | 0.129 | 0.999 | 0.877 | 1.138 |
| Glial cell line-derived neurotrophic factor levels | Fibromyalgia | MR Egger | 12.000 | -0.051 | 0.158 | 0.754 | -0.361 | 0.259 | 0.950 | 0.697 | 1.295 |
| Glial cell line-derived neurotrophic factor levels | Fibromyalgia | Weighted median | 12.000 | -0.107 | 0.121 | 0.375 | -0.343 | 0.129 | 0.899 | 0.710 | 1.138 |
| Glial cell line-derived neurotrophic factor levels | Fibromyalgia | Inverse variance weighted | 12.000 | -0.043 | 0.093 | 0.646 | -0.225 | 0.139 | 0.958 | 0.799 | 1.150 |
| Hepatocyte growth factor levels | Fibromyalgia | MR Egger | 18.000 | -0.073 | 0.338 | 0.832 | -0.736 | 0.590 | 0.930 | 0.479 | 1.804 |
| Hepatocyte growth factor levels | Fibromyalgia | Weighted median | 18.000 | -0.096 | 0.169 | 0.571 | -0.427 | 0.236 | 0.909 | 0.652 | 1.266 |
| Hepatocyte growth factor levels | Fibromyalgia | Inverse variance weighted | 18.000 | -0.045 | 0.149 | 0.763 | -0.336 | 0.246 | 0.956 | 0.715 | 1.279 |
| Interferon gamma levels | Fibromyalgia | MR Egger | 10.000 | -0.296 | 0.273 | 0.309 | -0.832 | 0.239 | 0.743 | 0.435 | 1.270 |
| Interferon gamma levels | Fibromyalgia | Weighted median | 10.000 | -0.095 | 0.185 | 0.609 | -0.458 | 0.269 | 0.909 | 0.632 | 1.308 |
| Interferon gamma levels | Fibromyalgia | Inverse variance weighted | 10.000 | -0.048 | 0.157 | 0.759 | -0.357 | 0.260 | 0.953 | 0.700 | 1.297 |
| Interleukin-10 levels | Fibromyalgia | MR Egger | 18.000 | 0.003 | 0.230 | 0.991 | -0.449 | 0.454 | 1.003 | 0.638 | 1.575 |
| Interleukin-10 levels | Fibromyalgia | Weighted median | 18.000 | -0.218 | 0.132 | 0.098 | -0.477 | 0.040 | 0.804 | 0.621 | 1.041 |
| Interleukin-10 levels | Fibromyalgia | Inverse variance weighted | 18.000 | -0.136 | 0.109 | 0.212 | -0.350 | 0.078 | 0.873 | 0.705 | 1.081 |
| Interleukin-10 receptor subunit alpha levels | Fibromyalgia | MR Egger | 10.000 | -0.098 | 0.172 | 0.585 | -0.435 | 0.239 | 0.907 | 0.647 | 1.270 |
| Interleukin-10 receptor subunit alpha levels | Fibromyalgia | Weighted median | 10.000 | 0.004 | 0.136 | 0.978 | -0.262 | 0.270 | 1.004 | 0.769 | 1.310 |
| Interleukin-10 receptor subunit alpha levels | Fibromyalgia | Inverse variance weighted | 10.000 | -0.031 | 0.104 | 0.766 | -0.235 | 0.173 | 0.969 | 0.790 | 1.189 |
| Interleukin-10 receptor subunit beta levels | Fibromyalgia | MR Egger | 18.000 | 0.005 | 0.090 | 0.956 | -0.171 | 0.182 | 1.005 | 0.842 | 1.199 |
| Interleukin-10 receptor subunit beta levels | Fibromyalgia | Weighted median | 18.000 | -0.014 | 0.063 | 0.827 | -0.137 | 0.109 | 0.986 | 0.872 | 1.116 |
| Interleukin-10 receptor subunit beta levels | Fibromyalgia | Inverse variance weighted | 18.000 | -0.014 | 0.060 | 0.815 | -0.131 | 0.103 | 0.986 | 0.877 | 1.109 |
| Interleukin-12 subunit beta levels | Fibromyalgia | MR Egger | 28.000 | 0.150 | 0.069 | 0.040 | 0.014 | 0.285 | 1.161 | 1.014 | 1.330 |
| Interleukin-12 subunit beta levels | Fibromyalgia | Weighted median | 28.000 | 0.134 | 0.056 | 0.017 | 0.024 | 0.245 | 1.144 | 1.024 | 1.278 |
| Interleukin-12 subunit beta levels | Fibromyalgia | Inverse variance weighted | 28.000 | 0.106 | 0.044 | 0.016 | 0.020 | 0.192 | 1.112 | 1.020 | 1.212 |
| Interleukin-13 levels | Fibromyalgia | MR Egger | 11.000 | -0.100 | 0.217 | 0.657 | -0.525 | 0.326 | 0.905 | 0.591 | 1.385 |
| Interleukin-13 levels | Fibromyalgia | Weighted median | 11.000 | -0.085 | 0.155 | 0.584 | -0.388 | 0.219 | 0.919 | 0.678 | 1.245 |
| Interleukin-13 levels | Fibromyalgia | Inverse variance weighted | 11.000 | -0.134 | 0.107 | 0.211 | -0.344 | 0.076 | 0.875 | 0.709 | 1.079 |
| Interleukin-15 receptor subunit alpha levels | Fibromyalgia | MR Egger | 12.000 | -0.179 | 0.103 | 0.113 | -0.382 | 0.023 | 0.836 | 0.683 | 1.023 |
| Interleukin-15 receptor subunit alpha levels | Fibromyalgia | Weighted median | 12.000 | -0.049 | 0.066 | 0.464 | -0.179 | 0.081 | 0.953 | 0.836 | 1.085 |
| Interleukin-15 receptor subunit alpha levels | Fibromyalgia | Inverse variance weighted | 12.000 | 0.011 | 0.063 | 0.859 | -0.113 | 0.135 | 1.011 | 0.894 | 1.145 |
| Interleukin-17A levels | Fibromyalgia | MR Egger | 12.000 | 0.427 | 0.399 | 0.310 | -0.355 | 1.209 | 1.533 | 0.701 | 3.349 |
| Interleukin-17A levels | Fibromyalgia | Weighted median | 12.000 | 0.040 | 0.186 | 0.827 | -0.323 | 0.404 | 1.041 | 0.724 | 1.498 |
| Interleukin-17A levels | Fibromyalgia | Inverse variance weighted | 12.000 | 0.060 | 0.153 | 0.693 | -0.239 | 0.360 | 1.062 | 0.787 | 1.433 |
| Interleukin-17C levels | Fibromyalgia | MR Egger | 17.000 | 0.586 | 0.342 | 0.107 | -0.084 | 1.256 | 1.797 | 0.920 | 3.510 |
| Interleukin-17C levels | Fibromyalgia | Weighted median | 17.000 | -0.222 | 0.159 | 0.163 | -0.534 | 0.090 | 0.801 | 0.586 | 1.094 |
| Interleukin-17C levels | Fibromyalgia | Inverse variance weighted | 17.000 | -0.038 | 0.120 | 0.753 | -0.274 | 0.198 | 0.963 | 0.760 | 1.219 |
| Interleukin-18 levels | Fibromyalgia | MR Egger | 21.000 | 0.090 | 0.161 | 0.584 | -0.226 | 0.405 | 1.094 | 0.798 | 1.499 |
| Interleukin-18 levels | Fibromyalgia | Weighted median | 21.000 | 0.072 | 0.105 | 0.492 | -0.133 | 0.277 | 1.075 | 0.875 | 1.319 |
| Interleukin-18 levels | Fibromyalgia | Inverse variance weighted | 21.000 | 0.078 | 0.075 | 0.297 | -0.069 | 0.225 | 1.081 | 0.934 | 1.253 |
| interleukin-18 receptor 1 levels | Fibromyalgia | MR Egger | 20.000 | -0.069 | 0.110 | 0.541 | -0.285 | 0.148 | 0.934 | 0.752 | 1.159 |
| interleukin-18 receptor 1 levels | Fibromyalgia | Weighted median | 20.000 | -0.106 | 0.070 | 0.133 | -0.244 | 0.032 | 0.899 | 0.783 | 1.033 |
| interleukin-18 receptor 1 levels | Fibromyalgia | Inverse variance weighted | 20.000 | -0.051 | 0.058 | 0.378 | -0.164 | 0.062 | 0.950 | 0.849 | 1.064 |
| Interleukin-1-alpha levels | Fibromyalgia | MR Egger | 12.000 | -0.071 | 0.272 | 0.799 | -0.604 | 0.462 | 0.931 | 0.547 | 1.587 |
| Interleukin-1-alpha levels | Fibromyalgia | Weighted median | 12.000 | -0.015 | 0.154 | 0.921 | -0.317 | 0.286 | 0.985 | 0.728 | 1.331 |
| Interleukin-1-alpha levels | Fibromyalgia | Inverse variance weighted | 12.000 | -0.139 | 0.134 | 0.299 | -0.401 | 0.123 | 0.870 | 0.670 | 1.131 |
| Interleukin-2 levels | Fibromyalgia | MR Egger | 15.000 | -0.157 | 0.340 | 0.653 | -0.823 | 0.510 | 0.855 | 0.439 | 1.665 |
| Interleukin-2 levels | Fibromyalgia | Weighted median | 15.000 | -0.052 | 0.139 | 0.706 | -0.324 | 0.219 | 0.949 | 0.723 | 1.245 |
| Interleukin-2 levels | Fibromyalgia | Inverse variance weighted | 15.000 | -0.109 | 0.124 | 0.380 | -0.353 | 0.135 | 0.897 | 0.703 | 1.144 |
| Interleukin-20 levels | Fibromyalgia | MR Egger | 11.000 | 0.115 | 0.284 | 0.696 | -0.442 | 0.671 | 1.121 | 0.643 | 1.955 |
| Interleukin-20 levels | Fibromyalgia | Weighted median | 11.000 | 0.193 | 0.183 | 0.290 | -0.165 | 0.551 | 1.213 | 0.848 | 1.735 |
| Interleukin-20 levels | Fibromyalgia | Inverse variance weighted | 11.000 | 0.162 | 0.132 | 0.220 | -0.097 | 0.421 | 1.176 | 0.908 | 1.523 |
| Interleukin-20 receptor subunit alpha levels | Fibromyalgia | MR Egger | 11.000 | -0.093 | 0.318 | 0.778 | -0.717 | 0.532 | 0.912 | 0.488 | 1.702 |
| Interleukin-20 receptor subunit alpha levels | Fibromyalgia | Weighted median | 11.000 | 0.032 | 0.173 | 0.852 | -0.306 | 0.370 | 1.033 | 0.736 | 1.448 |
| Interleukin-20 receptor subunit alpha levels | Fibromyalgia | Inverse variance weighted | 11.000 | -0.062 | 0.144 | 0.667 | -0.344 | 0.220 | 0.940 | 0.709 | 1.246 |
| Interleukin-22 receptor subunit alpha-1 levels | Fibromyalgia | MR Egger | 11.000 | -0.183 | 0.332 | 0.595 | -0.834 | 0.468 | 0.833 | 0.434 | 1.597 |
| Interleukin-22 receptor subunit alpha-1 levels | Fibromyalgia | Weighted median | 11.000 | -0.157 | 0.206 | 0.447 | -0.560 | 0.247 | 0.855 | 0.571 | 1.280 |
| Interleukin-22 receptor subunit alpha-1 levels | Fibromyalgia | Inverse variance weighted | 11.000 | -0.100 | 0.168 | 0.550 | -0.429 | 0.228 | 0.905 | 0.651 | 1.256 |
| Interleukin-24 levels | Fibromyalgia | MR Egger | 10.000 | -0.500 | 0.372 | 0.216 | -1.229 | 0.229 | 0.607 | 0.293 | 1.257 |
| Interleukin-24 levels | Fibromyalgia | Weighted median | 10.000 | -0.138 | 0.185 | 0.456 | -0.502 | 0.225 | 0.871 | 0.606 | 1.253 |
| Interleukin-24 levels | Fibromyalgia | Inverse variance weighted | 10.000 | -0.070 | 0.154 | 0.649 | -0.373 | 0.232 | 0.932 | 0.689 | 1.261 |
| Interleukin-2 receptor subunit beta levels | Fibromyalgia | MR Egger | 12.000 | -0.128 | 0.294 | 0.673 | -0.704 | 0.448 | 0.880 | 0.494 | 1.566 |
| Interleukin-2 receptor subunit beta levels | Fibromyalgia | Weighted median | 12.000 | 0.121 | 0.180 | 0.500 | -0.231 | 0.474 | 1.129 | 0.794 | 1.607 |
| Interleukin-2 receptor subunit beta levels | Fibromyalgia | Inverse variance weighted | 12.000 | 0.054 | 0.137 | 0.691 | -0.213 | 0.322 | 1.056 | 0.808 | 1.380 |
| Interleukin-33 levels | Fibromyalgia | MR Egger | 11.000 | 0.080 | 0.307 | 0.801 | -0.523 | 0.682 | 1.083 | 0.593 | 1.978 |
| Interleukin-33 levels | Fibromyalgia | Weighted median | 11.000 | 0.076 | 0.167 | 0.648 | -0.251 | 0.403 | 1.079 | 0.778 | 1.497 |
| Interleukin-33 levels | Fibromyalgia | Inverse variance weighted | 11.000 | 0.059 | 0.120 | 0.622 | -0.175 | 0.293 | 1.061 | 0.839 | 1.341 |
| Interleukin-4 levels | Fibromyalgia | MR Egger | 9.000 | -0.035 | 0.345 | 0.922 | -0.711 | 0.641 | 0.965 | 0.491 | 1.898 |
| Interleukin-4 levels | Fibromyalgia | Weighted median | 9.000 | 0.003 | 0.181 | 0.988 | -0.351 | 0.357 | 1.003 | 0.704 | 1.429 |
| Interleukin-4 levels | Fibromyalgia | Inverse variance weighted | 9.000 | 0.073 | 0.137 | 0.597 | -0.197 | 0.342 | 1.075 | 0.822 | 1.408 |
| Interleukin-5 levels | Fibromyalgia | MR Egger | 11.000 | -0.464 | 0.224 | 0.069 | -0.904 | -0.024 | 0.629 | 0.405 | 0.976 |
| Interleukin-5 levels | Fibromyalgia | Weighted median | 11.000 | -0.047 | 0.161 | 0.772 | -0.363 | 0.269 | 0.954 | 0.696 | 1.309 |
| Interleukin-5 levels | Fibromyalgia | Inverse variance weighted | 11.000 | -0.112 | 0.119 | 0.346 | -0.344 | 0.121 | 0.894 | 0.709 | 1.128 |
| Interleukin-6 levels | Fibromyalgia | MR Egger | 8.000 | 0.234 | 0.285 | 0.444 | -0.325 | 0.793 | 1.263 | 0.722 | 2.210 |
| Interleukin-6 levels | Fibromyalgia | Weighted median | 8.000 | 0.167 | 0.152 | 0.273 | -0.131 | 0.466 | 1.182 | 0.877 | 1.593 |
| Interleukin-6 levels | Fibromyalgia | Inverse variance weighted | 8.000 | 0.091 | 0.137 | 0.509 | -0.178 | 0.360 | 1.095 | 0.837 | 1.433 |
| Interleukin-7 levels | Fibromyalgia | MR Egger | 12.000 | 1.106 | 0.443 | 0.031 | 0.239 | 1.974 | 3.023 | 1.270 | 7.200 |
| Interleukin-7 levels | Fibromyalgia | Weighted median | 12.000 | 0.407 | 0.201 | 0.043 | 0.013 | 0.801 | 1.502 | 1.013 | 2.228 |
| Interleukin-7 levels | Fibromyalgia | Inverse variance weighted | 12.000 | 0.246 | 0.141 | 0.081 | -0.030 | 0.522 | 1.279 | 0.970 | 1.685 |
| Interleukin-8 levels | Fibromyalgia | MR Egger | 17.000 | -0.124 | 0.241 | 0.614 | -0.595 | 0.348 | 0.883 | 0.551 | 1.416 |
| Interleukin-8 levels | Fibromyalgia | Weighted median | 17.000 | -0.122 | 0.164 | 0.459 | -0.443 | 0.200 | 0.886 | 0.642 | 1.222 |
| Interleukin-8 levels | Fibromyalgia | Inverse variance weighted | 17.000 | -0.005 | 0.118 | 0.967 | -0.236 | 0.227 | 0.995 | 0.789 | 1.254 |
| Latency-associated peptide transforming growth factor beta 1 levels | Fibromyalgia | MR Egger | 19.000 | 0.142 | 0.211 | 0.510 | -0.272 | 0.556 | 1.153 | 0.762 | 1.744 |
| Latency-associated peptide transforming growth factor beta 1 levels | Fibromyalgia | Weighted median | 19.000 | -0.087 | 0.132 | 0.510 | -0.346 | 0.172 | 0.917 | 0.708 | 1.187 |
| Latency-associated peptide transforming growth factor beta 1 levels | Fibromyalgia | Inverse variance weighted | 19.000 | 0.045 | 0.120 | 0.710 | -0.191 | 0.280 | 1.046 | 0.826 | 1.323 |
| Leukemia inhibitory factor levels | Fibromyalgia | MR Egger | 11.000 | 0.188 | 0.275 | 0.510 | -0.350 | 0.726 | 1.207 | 0.705 | 2.068 |
| Leukemia inhibitory factor levels | Fibromyalgia | Weighted median | 11.000 | 0.256 | 0.176 | 0.147 | -0.090 | 0.602 | 1.292 | 0.914 | 1.825 |
| Leukemia inhibitory factor levels | Fibromyalgia | Inverse variance weighted | 11.000 | 0.160 | 0.130 | 0.220 | -0.095 | 0.415 | 1.173 | 0.909 | 1.514 |
| Leukemia inhibitory factor receptor levels | Fibromyalgia | MR Egger | 16.000 | -0.275 | 0.173 | 0.133 | -0.614 | 0.063 | 0.759 | 0.541 | 1.065 |
| Leukemia inhibitory factor receptor levels | Fibromyalgia | Weighted median | 16.000 | -0.186 | 0.098 | 0.058 | -0.379 | 0.006 | 0.830 | 0.685 | 1.006 |
| Leukemia inhibitory factor receptor levels | Fibromyalgia | Inverse variance weighted | 16.000 | -0.127 | 0.091 | 0.163 | -0.306 | 0.051 | 0.880 | 0.736 | 1.053 |
| Monocyte chemoattractant protein-1 levels | Fibromyalgia | MR Egger | 22.000 | -0.082 | 0.109 | 0.460 | -0.296 | 0.132 | 0.921 | 0.744 | 1.141 |
| Monocyte chemoattractant protein-1 levels | Fibromyalgia | Weighted median | 22.000 | -0.004 | 0.083 | 0.961 | -0.168 | 0.160 | 0.996 | 0.846 | 1.173 |
| Monocyte chemoattractant protein-1 levels | Fibromyalgia | Inverse variance weighted | 22.000 | 0.016 | 0.064 | 0.801 | -0.109 | 0.141 | 1.016 | 0.897 | 1.152 |
| Monocyte chemoattractant protein 2 levels | Fibromyalgia | MR Egger | 28.000 | -0.064 | 0.050 | 0.213 | -0.162 | 0.034 | 0.938 | 0.851 | 1.035 |
| Monocyte chemoattractant protein 2 levels | Fibromyalgia | Weighted median | 28.000 | -0.086 | 0.054 | 0.111 | -0.192 | 0.020 | 0.917 | 0.825 | 1.020 |
| Monocyte chemoattractant protein 2 levels | Fibromyalgia | Inverse variance weighted | 28.000 | -0.103 | 0.039 | 0.008 | -0.180 | -0.026 | 0.902 | 0.836 | 0.974 |
| Monocyte chemoattractant protein-3 levels | Fibromyalgia | MR Egger | 17.000 | -0.144 | 0.206 | 0.495 | -0.549 | 0.260 | 0.866 | 0.578 | 1.297 |
| Monocyte chemoattractant protein-3 levels | Fibromyalgia | Weighted median | 17.000 | 0.026 | 0.125 | 0.833 | -0.218 | 0.271 | 1.027 | 0.804 | 1.311 |
| Monocyte chemoattractant protein-3 levels | Fibromyalgia | Inverse variance weighted | 17.000 | 0.022 | 0.096 | 0.823 | -0.167 | 0.210 | 1.022 | 0.846 | 1.234 |
| Monocyte chemoattractant protein-4 levels | Fibromyalgia | MR Egger | 18.000 | 0.154 | 0.150 | 0.319 | -0.139 | 0.447 | 1.166 | 0.870 | 1.564 |
| Monocyte chemoattractant protein-4 levels | Fibromyalgia | Weighted median | 18.000 | 0.005 | 0.100 | 0.964 | -0.191 | 0.200 | 1.005 | 0.826 | 1.222 |
| Monocyte chemoattractant protein-4 levels | Fibromyalgia | Inverse variance weighted | 18.000 | 0.051 | 0.072 | 0.483 | -0.091 | 0.193 | 1.052 | 0.913 | 1.212 |
| Macrophage inflammatory protein 1a levels | Fibromyalgia | MR Egger | 14.000 | 0.054 | 0.118 | 0.654 | -0.176 | 0.285 | 1.056 | 0.838 | 1.329 |
| Macrophage inflammatory protein 1a levels | Fibromyalgia | Weighted median | 14.000 | 0.065 | 0.082 | 0.430 | -0.096 | 0.225 | 1.067 | 0.908 | 1.253 |
| Macrophage inflammatory protein 1a levels | Fibromyalgia | Inverse variance weighted | 14.000 | 0.053 | 0.071 | 0.452 | -0.086 | 0.192 | 1.055 | 0.918 | 1.212 |
| Matrix metalloproteinase-1 levels | Fibromyalgia | MR Egger | 16.000 | 0.107 | 0.186 | 0.575 | -0.257 | 0.471 | 1.113 | 0.773 | 1.602 |
| Matrix metalloproteinase-1 levels | Fibromyalgia | Weighted median | 16.000 | -0.048 | 0.130 | 0.711 | -0.304 | 0.207 | 0.953 | 0.738 | 1.230 |
| Matrix metalloproteinase-1 levels | Fibromyalgia | Inverse variance weighted | 16.000 | 0.011 | 0.100 | 0.913 | -0.184 | 0.206 | 1.011 | 0.832 | 1.229 |
| Matrix metalloproteinase-10 levels | Fibromyalgia | MR Egger | 14.000 | -0.160 | 0.134 | 0.254 | -0.423 | 0.102 | 0.852 | 0.655 | 1.108 |
| Matrix metalloproteinase-10 levels | Fibromyalgia | Weighted median | 14.000 | -0.136 | 0.113 | 0.225 | -0.357 | 0.084 | 0.872 | 0.700 | 1.088 |
| Matrix metalloproteinase-10 levels | Fibromyalgia | Inverse variance weighted | 14.000 | -0.165 | 0.085 | 0.051 | -0.331 | 0.001 | 0.848 | 0.718 | 1.001 |
| Neurturin levels | Fibromyalgia | MR Egger | 14.000 | -0.025 | 0.172 | 0.888 | -0.362 | 0.313 | 0.976 | 0.696 | 1.367 |
| Neurturin levels | Fibromyalgia | Weighted median | 14.000 | 0.053 | 0.132 | 0.688 | -0.206 | 0.312 | 1.055 | 0.814 | 1.367 |
| Neurturin levels | Fibromyalgia | Inverse variance weighted | 14.000 | 0.043 | 0.096 | 0.654 | -0.145 | 0.231 | 1.044 | 0.865 | 1.260 |
| Neurotrophin-3 levels | Fibromyalgia | MR Egger | 17.000 | 0.036 | 0.247 | 0.885 | -0.448 | 0.520 | 1.037 | 0.639 | 1.682 |
| Neurotrophin-3 levels | Fibromyalgia | Weighted median | 17.000 | -0.056 | 0.159 | 0.726 | -0.368 | 0.256 | 0.946 | 0.692 | 1.292 |
| Neurotrophin-3 levels | Fibromyalgia | Inverse variance weighted | 17.000 | 0.034 | 0.111 | 0.759 | -0.184 | 0.252 | 1.035 | 0.832 | 1.286 |
| Osteoprotegerin levels | Fibromyalgia | MR Egger | 18.000 | 0.180 | 0.187 | 0.351 | -0.186 | 0.546 | 1.197 | 0.830 | 1.726 |
| Osteoprotegerin levels | Fibromyalgia | Weighted median | 18.000 | 0.114 | 0.122 | 0.349 | -0.125 | 0.354 | 1.121 | 0.883 | 1.424 |
| Osteoprotegerin levels | Fibromyalgia | Inverse variance weighted | 18.000 | 0.045 | 0.088 | 0.609 | -0.127 | 0.217 | 1.046 | 0.881 | 1.242 |
| Oncostatin-M levels | Fibromyalgia | MR Egger | 15.000 | -0.143 | 0.212 | 0.511 | -0.559 | 0.272 | 0.866 | 0.572 | 1.313 |
| Oncostatin-M levels | Fibromyalgia | Weighted median | 15.000 | -0.102 | 0.126 | 0.421 | -0.349 | 0.146 | 0.903 | 0.705 | 1.157 |
| Oncostatin-M levels | Fibromyalgia | Inverse variance weighted | 15.000 | -0.086 | 0.098 | 0.379 | -0.277 | 0.105 | 0.918 | 0.758 | 1.111 |
| Programmed cell death 1 ligand 1 levels | Fibromyalgia | MR Egger | 16.000 | -0.144 | 0.251 | 0.575 | -0.635 | 0.347 | 0.866 | 0.530 | 1.415 |
| Programmed cell death 1 ligand 1 levels | Fibromyalgia | Weighted median | 16.000 | -0.072 | 0.139 | 0.605 | -0.344 | 0.200 | 0.931 | 0.709 | 1.221 |
| Programmed cell death 1 ligand 1 levels | Fibromyalgia | Inverse variance weighted | 16.000 | -0.008 | 0.103 | 0.936 | -0.211 | 0.194 | 0.992 | 0.810 | 1.214 |
| Stem cell factor levels | Fibromyalgia | MR Egger | 32.000 | 0.155 | 0.103 | 0.142 | -0.047 | 0.357 | 1.168 | 0.954 | 1.430 |
| Stem cell factor levels | Fibromyalgia | Weighted median | 32.000 | 0.070 | 0.094 | 0.454 | -0.114 | 0.254 | 1.073 | 0.893 | 1.289 |
| Stem cell factor levels | Fibromyalgia | Inverse variance weighted | 32.000 | 0.057 | 0.059 | 0.331 | -0.058 | 0.172 | 1.059 | 0.944 | 1.188 |
| SIR2-like protein 2 levels | Fibromyalgia | MR Egger | 13.000 | 0.376 | 0.370 | 0.331 | -0.350 | 1.103 | 1.457 | 0.705 | 3.012 |
| SIR2-like protein 2 levels | Fibromyalgia | Weighted median | 13.000 | 0.287 | 0.191 | 0.134 | -0.088 | 0.662 | 1.332 | 0.915 | 1.939 |
| SIR2-like protein 2 levels | Fibromyalgia | Inverse variance weighted | 13.000 | 0.192 | 0.178 | 0.281 | -0.157 | 0.542 | 1.212 | 0.855 | 1.719 |
| Signaling lymphocytic activation molecule levels | Fibromyalgia | MR Egger | 25.000 | -0.129 | 0.209 | 0.545 | -0.539 | 0.282 | 0.879 | 0.583 | 1.326 |
| Signaling lymphocytic activation molecule levels | Fibromyalgia | Weighted median | 25.000 | 0.082 | 0.117 | 0.483 | -0.148 | 0.312 | 1.086 | 0.863 | 1.367 |
| Signaling lymphocytic activation molecule levels | Fibromyalgia | Inverse variance weighted | 25.000 | 0.027 | 0.097 | 0.778 | -0.163 | 0.218 | 1.028 | 0.850 | 1.243 |
| Sulfotransferase 1A1 levels | Fibromyalgia | MR Egger | 23.000 | 0.094 | 0.167 | 0.581 | -0.234 | 0.421 | 1.098 | 0.791 | 1.524 |
| Sulfotransferase 1A1 levels | Fibromyalgia | Weighted median | 23.000 | 0.174 | 0.098 | 0.075 | -0.017 | 0.365 | 1.190 | 0.983 | 1.440 |
| Sulfotransferase 1A1 levels | Fibromyalgia | Inverse variance weighted | 23.000 | 0.074 | 0.069 | 0.285 | -0.062 | 0.210 | 1.077 | 0.940 | 1.234 |
| STAM binding protein levels | Fibromyalgia | MR Egger | 11.000 | -0.082 | 0.619 | 0.897 | -1.296 | 1.132 | 0.921 | 0.274 | 3.100 |
| STAM binding protein levels | Fibromyalgia | Weighted median | 11.000 | 0.223 | 0.229 | 0.331 | -0.227 | 0.672 | 1.250 | 0.797 | 1.958 |
| STAM binding protein levels | Fibromyalgia | Inverse variance weighted | 11.000 | 0.036 | 0.197 | 0.855 | -0.350 | 0.421 | 1.036 | 0.705 | 1.524 |
| Transforming growth factor-alpha levels | Fibromyalgia | MR Egger | 14.000 | 0.079 | 0.243 | 0.751 | -0.398 | 0.555 | 1.082 | 0.672 | 1.743 |
| Transforming growth factor-alpha levels | Fibromyalgia | Weighted median | 14.000 | -0.033 | 0.156 | 0.832 | -0.340 | 0.273 | 0.967 | 0.712 | 1.314 |
| Transforming growth factor-alpha levels | Fibromyalgia | Inverse variance weighted | 14.000 | -0.020 | 0.107 | 0.850 | -0.229 | 0.189 | 0.980 | 0.795 | 1.208 |
| Tumor necrosis factor levels | Fibromyalgia | MR Egger | 18.000 | -0.216 | 0.215 | 0.332 | -0.638 | 0.207 | 0.806 | 0.529 | 1.229 |
| Tumor necrosis factor levels | Fibromyalgia | Weighted median | 18.000 | -0.195 | 0.150 | 0.193 | -0.488 | 0.099 | 0.823 | 0.614 | 1.104 |
| Tumor necrosis factor levels | Fibromyalgia | Inverse variance weighted | 18.000 | -0.266 | 0.114 | 0.020 | -0.489 | -0.042 | 0.767 | 0.613 | 0.959 |
| TNF-beta levels | Fibromyalgia | MR Egger | 23.000 | -0.036 | 0.098 | 0.717 | -0.229 | 0.156 | 0.965 | 0.796 | 1.169 |
| TNF-beta levels | Fibromyalgia | Weighted median | 23.000 | -0.035 | 0.057 | 0.545 | -0.147 | 0.078 | 0.966 | 0.863 | 1.081 |
| TNF-beta levels | Fibromyalgia | Inverse variance weighted | 23.000 | -0.061 | 0.061 | 0.318 | -0.181 | 0.059 | 0.941 | 0.834 | 1.061 |
| Tumor necrosis factor receptor superfamily member 9 levels | Fibromyalgia | MR Egger | 27.000 | -0.051 | 0.166 | 0.762 | -0.375 | 0.274 | 0.950 | 0.687 | 1.315 |
| Tumor necrosis factor receptor superfamily member 9 levels | Fibromyalgia | Weighted median | 27.000 | 0.105 | 0.105 | 0.317 | -0.101 | 0.312 | 1.111 | 0.904 | 1.366 |
| Tumor necrosis factor receptor superfamily member 9 levels | Fibromyalgia | Inverse variance weighted | 27.000 | 0.078 | 0.074 | 0.292 | -0.067 | 0.223 | 1.081 | 0.935 | 1.250 |
| Tumor necrosis factor ligand superfamily member 14 levels | Fibromyalgia | MR Egger | 25.000 | -0.207 | 0.115 | 0.084 | -0.432 | 0.018 | 0.813 | 0.649 | 1.018 |
| Tumor necrosis factor ligand superfamily member 14 levels | Fibromyalgia | Weighted median | 25.000 | -0.141 | 0.102 | 0.168 | -0.341 | 0.059 | 0.869 | 0.711 | 1.061 |
| Tumor necrosis factor ligand superfamily member 14 levels | Fibromyalgia | Inverse variance weighted | 25.000 | -0.111 | 0.070 | 0.116 | -0.248 | 0.027 | 0.895 | 0.780 | 1.028 |
| TNF-related apoptosis-inducing ligand levels | Fibromyalgia | MR Egger | 27.000 | 0.039 | 0.083 | 0.646 | -0.124 | 0.202 | 1.039 | 0.883 | 1.224 |
| TNF-related apoptosis-inducing ligand levels | Fibromyalgia | Weighted median | 27.000 | 0.037 | 0.073 | 0.615 | -0.106 | 0.180 | 1.037 | 0.899 | 1.197 |
| TNF-related apoptosis-inducing ligand levels | Fibromyalgia | Inverse variance weighted | 27.000 | 0.023 | 0.052 | 0.662 | -0.079 | 0.124 | 1.023 | 0.924 | 1.132 |
| TNF-related activation-induced cytokine levels | Fibromyalgia | MR Egger | 28.000 | 0.060 | 0.123 | 0.629 | -0.181 | 0.301 | 1.062 | 0.835 | 1.351 |
| TNF-related activation-induced cytokine levels | Fibromyalgia | Weighted median | 28.000 | 0.066 | 0.097 | 0.501 | -0.125 | 0.257 | 1.068 | 0.882 | 1.292 |
| TNF-related activation-induced cytokine levels | Fibromyalgia | Inverse variance weighted | 28.000 | 0.017 | 0.065 | 0.794 | -0.110 | 0.143 | 1.017 | 0.896 | 1.154 |
| Thymic stromal lymphopoietin levels | Fibromyalgia | MR Egger | 15.000 | -0.517 | 0.266 | 0.074 | -1.038 | 0.004 | 0.596 | 0.354 | 1.004 |
| Thymic stromal lymphopoietin levels | Fibromyalgia | Weighted median | 15.000 | -0.083 | 0.166 | 0.619 | -0.408 | 0.243 | 0.921 | 0.665 | 1.275 |
| Thymic stromal lymphopoietin levels | Fibromyalgia | Inverse variance weighted | 15.000 | -0.051 | 0.131 | 0.697 | -0.308 | 0.206 | 0.950 | 0.735 | 1.229 |
| Tumor necrosis factor ligand superfamily member 12 levels | Fibromyalgia | MR Egger | 26.000 | -0.192 | 0.168 | 0.265 | -0.521 | 0.138 | 0.826 | 0.594 | 1.148 |
| Tumor necrosis factor ligand superfamily member 12 levels | Fibromyalgia | Weighted median | 26.000 | -0.051 | 0.112 | 0.653 | -0.271 | 0.170 | 0.951 | 0.763 | 1.185 |
| Tumor necrosis factor ligand superfamily member 12 levels | Fibromyalgia | Inverse variance weighted | 26.000 | -0.028 | 0.076 | 0.717 | -0.177 | 0.122 | 0.973 | 0.838 | 1.130 |
| Urokinase-type plasminogen activator levels | Fibromyalgia | MR Egger | 21.000 | 0.176 | 0.198 | 0.384 | -0.211 | 0.564 | 1.193 | 0.809 | 1.757 |
| Urokinase-type plasminogen activator levels | Fibromyalgia | Weighted median | 21.000 | 0.012 | 0.116 | 0.915 | -0.215 | 0.240 | 1.012 | 0.807 | 1.271 |
| Urokinase-type plasminogen activator levels | Fibromyalgia | Inverse variance weighted | 21.000 | 0.001 | 0.093 | 0.989 | -0.181 | 0.184 | 1.001 | 0.834 | 1.202 |
| Vascular endothelial growth factor A levels | Fibromyalgia | MR Egger | 24.000 | 0.103 | 0.081 | 0.213 | -0.055 | 0.261 | 1.109 | 0.947 | 1.299 |
| Vascular endothelial growth factor A levels | Fibromyalgia | Weighted median | 24.000 | 0.071 | 0.064 | 0.266 | -0.054 | 0.195 | 1.073 | 0.947 | 1.216 |
| Vascular endothelial growth factor A levels | Fibromyalgia | Inverse variance weighted | 24.000 | 0.034 | 0.053 | 0.517 | -0.069 | 0.138 | 1.035 | 0.933 | 1.148 |

| **Supplementary Table 4: sensitivity analysis results of inflammatory protein with significant MR analysis results and fibromyalgia (preliminary analysis cohort)** | | | | |
| --- | --- | --- | --- | --- |
| **Exposure** | **Outcome** | **Cochran Q (P value)** | **MR-Egger intercept (P value)** | **MR-PRESSO (P value) in the global heterogeneity test** |
| Natural killer cell receptor 2B4 levels | Fibromyalgia | 0.858 | 0.314 | 0.841 |
| CUB domain-containing protein 1 levels | Fibromyalgia | 0.572 | 0.973 | 0.536 |
| Protein S100-A12 levels | Fibromyalgia | 0.129 | 0.844 | 0.138 |
| Interleukin-12 subunit beta levels | Fibromyalgia | 0.761 | 0.421 | 0.797 |
| Monocyte chemoattractant protein 2 levels | Fibromyalgia | 0.602 | 0.222 | 0.614 |
| Tumor necrosis factor levels | Fibromyalgia | 0.129 | 0.785 | 0.187 |

| **Supplementary Table 5: functional enrichment analysis of CXCL5, S100-A12, LIFR, CCL8, and TNF** | | | | | | |
| --- | --- | --- | --- | --- | --- | --- |
| **Gene Ontology (GO)** | | | | | |  |
| **#term ID** | **term description** | **observed gene count** | **background gene count** | **strength** | **false discovery rate** | **matching proteins in your network (labels)** |
| GO:0030593 | Neutrophil chemotaxis | 8 | 80 | 2.29 | 7.99E-14 | CCL13,CXCL6,CXCL5,CCL11,S100A12,CCL8,CCL26,CXCL2 |
| GO:0050900 | Leukocyte migration | 9 | 249 | 1.85 | 3.05E-13 | CCL13,CXCL6,CXCL5,CCL11,S100A12,CCL8,CCL26,TNF,CXCL2 |
| GO:0019221 | Cytokine-mediated signaling pathway | 9 | 369 | 1.68 | 6.16E-12 | CCL13,CXCL6,CXCL5,CCL11,CCL8,CCL26,LIFR,TNF,CXCL2 |
| GO:0070887 | Cellular response to chemical stimulus | 10 | 2609 | 0.88 | 7.37E-07 | CCL13,CXCL6,CXCL5,CCL11,S100A12,CCL8,CCL26,LIFR,TNF,CXCL2 |
| **KEGG** | | | | | |  |
| **#term ID** | **term description** | **observed gene count** | **background gene count** | **strength** | **false discovery rate** | **matching proteins in your network (labels)** |
| hsa04061 | Viral protein interaction with cytokine and cytokine receptor | 8 | 96 | 2.22 | 6.85E-15 | CCL13,CXCL6,CXCL5,CCL11,CCL8,CCL26,TNF,CXCL2 |
| hsa04060 | Cytokine-cytokine receptor interaction | 9 | 282 | 1.8 | 4.89E-14 | CCL13,CXCL6,CXCL5,CCL11,CCL8,CCL26,LIFR,TNF,CXCL2 |
| hsa04062 | Chemokine signaling pathway | 7 | 186 | 1.87 | 1.02E-10 | CCL13,CXCL6,CXCL5,CCL11,CCL8,CCL26,CXCL2 |

| **Supplementary Table 6: functional enrichment analysis of CD244 and IL-12B** | | | | | | |
| --- | --- | --- | --- | --- | --- | --- |
| **Gene Ontology (GO)** | | | | | |  |
| **#term ID** | **term description** | **observed gene count** | **background gene count** | **strength** | **false discovery rate** | **matching proteins in your network (labels)** |
| GO:0032729 | Positive regulation of interferon-gamma production | 6 | 78 | 2.1 | 7.09E-08 | IL23A,IL12B,IL12RB2,IL12A,CD244,CD160 |
| GO:0032816 | Positive regulation of natural killer cell activation | 5 | 28 | 2.47 | 7.09E-08 | IL23A,IL12B,IL12RB2,IL12A,CD160 |
| GO:0002717 | Positive regulation of natural killer cell mediated immunity | 5 | 32 | 2.41 | 7.21E-08 | IL12B,IL12A,SH2D1B,CD160,SH2D1A |
| **KEGG** | | | | | |  |
| **#term ID** | **term description** | **observed gene count** | **background gene count** | **strength** | **false discovery rate** | **matching proteins in your network (labels)** |
| hsa04630 | JAK-STAT signaling pathway | 6 | 158 | 1.79 | 9.02E-08 | IL2RB,IL23A,IL12B,IL12RB2,IL22RA2,IL12A |
| hsa05321 | Inflammatory bowel disease | 4 | 59 | 2.05 | 7.73E-06 | IL23A,IL12B,IL12RB2,IL12A |
| hsa04658 | Th1 and Th2 cell differentiation | 4 | 85 | 1.89 | 2.09E-05 | IL2RB,IL12B,IL12RB2,IL12A |

**Figure S1 Leave-one-out analysis of gut microbiota with significant MR analysis results and fibromyalgia (preliminary analysis cohort).**


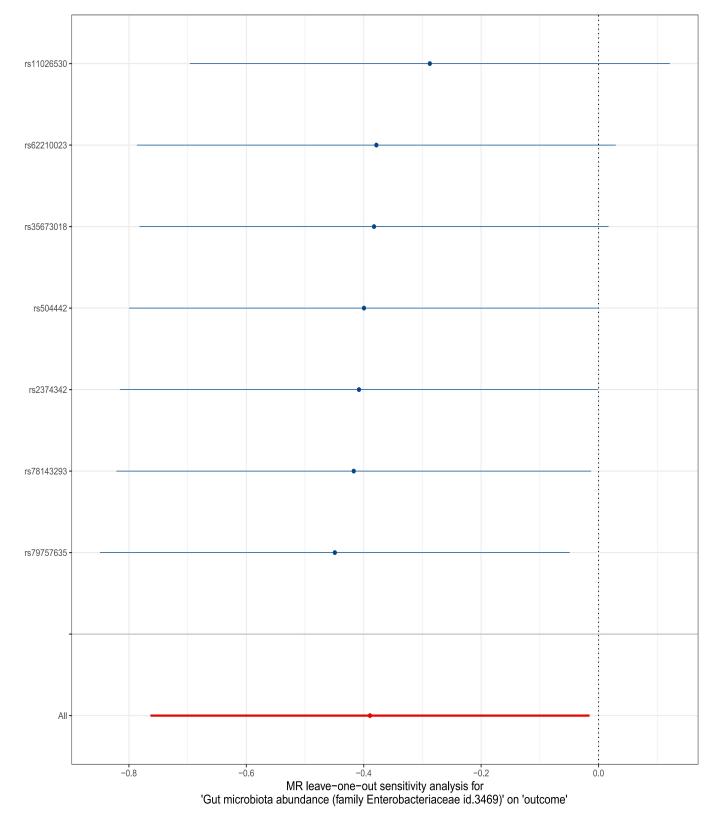

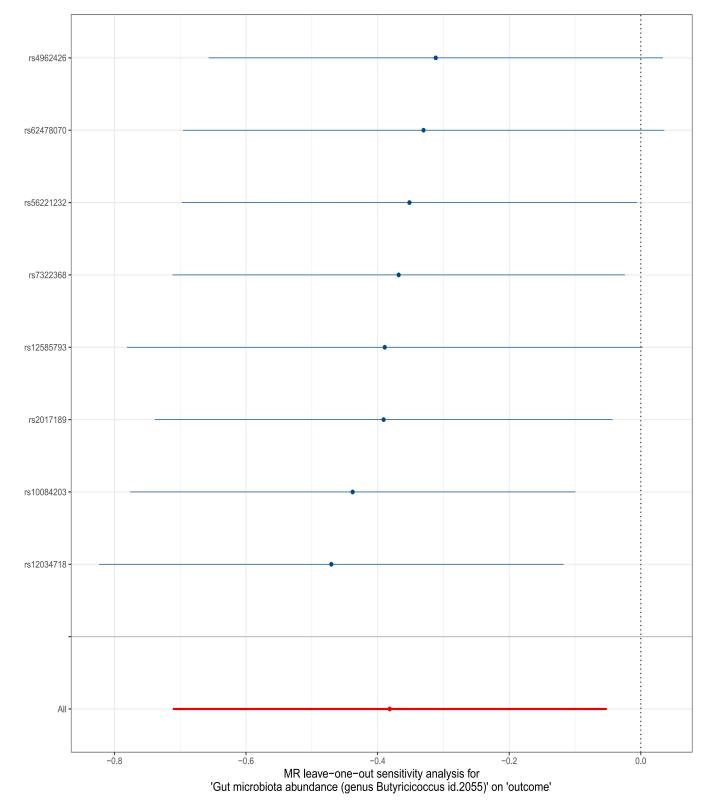


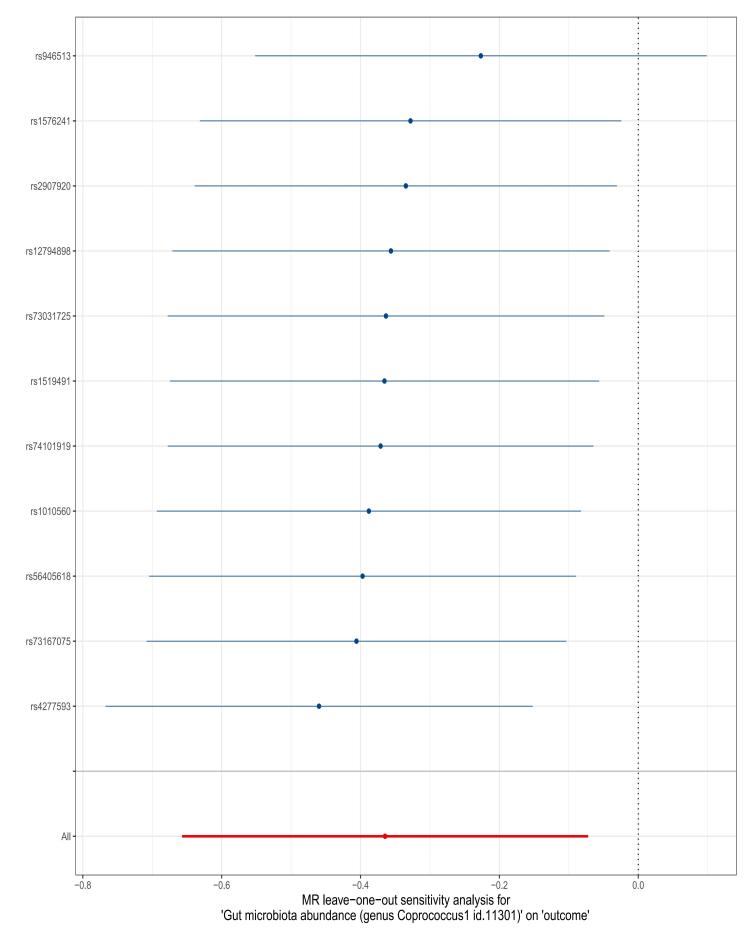

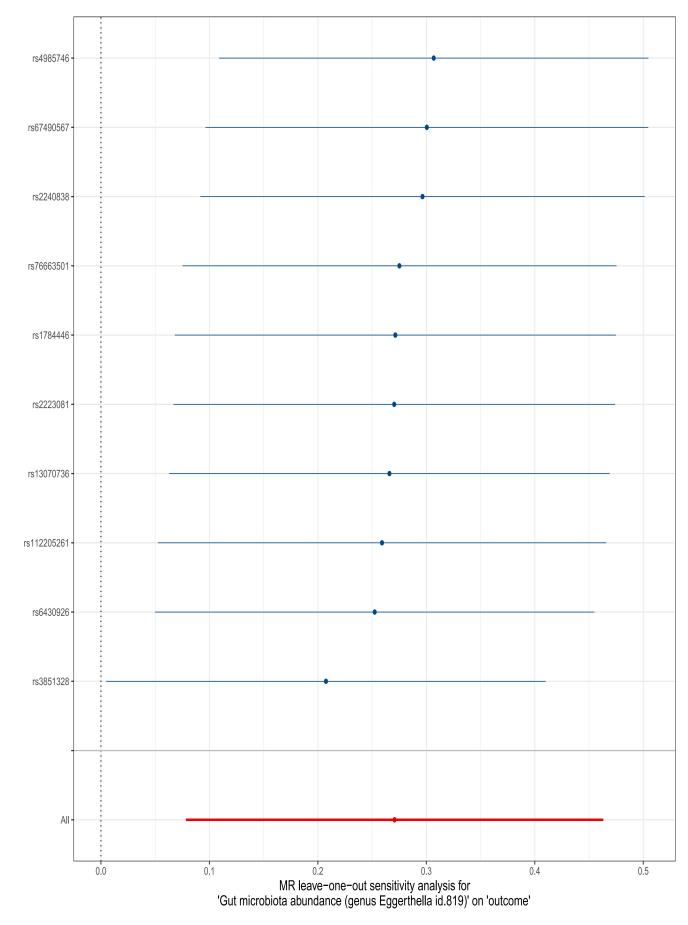


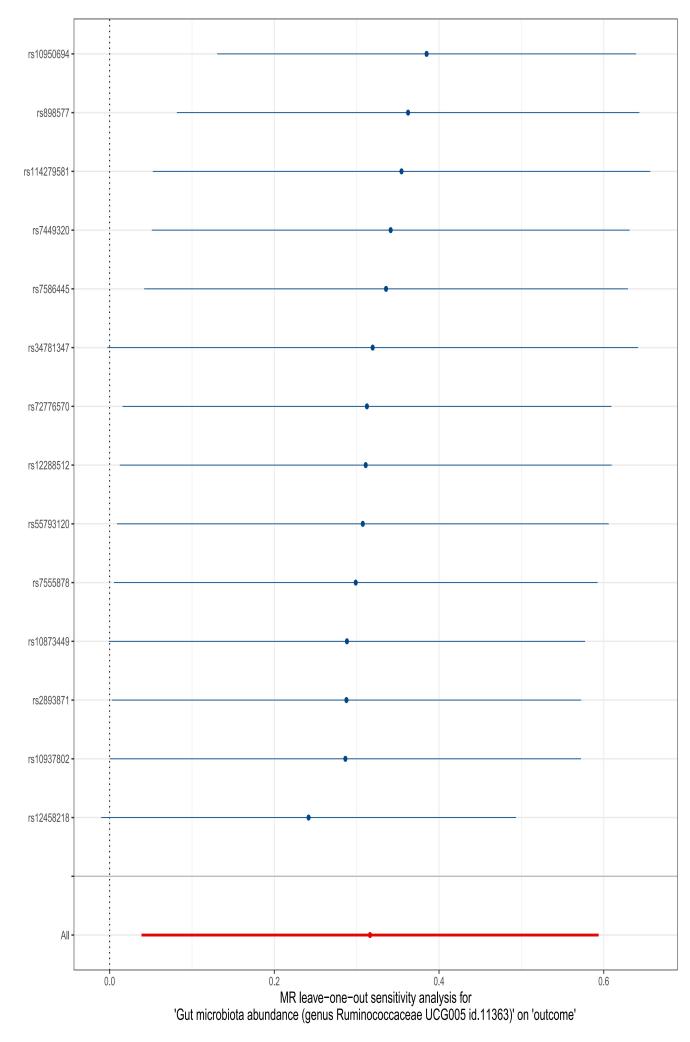

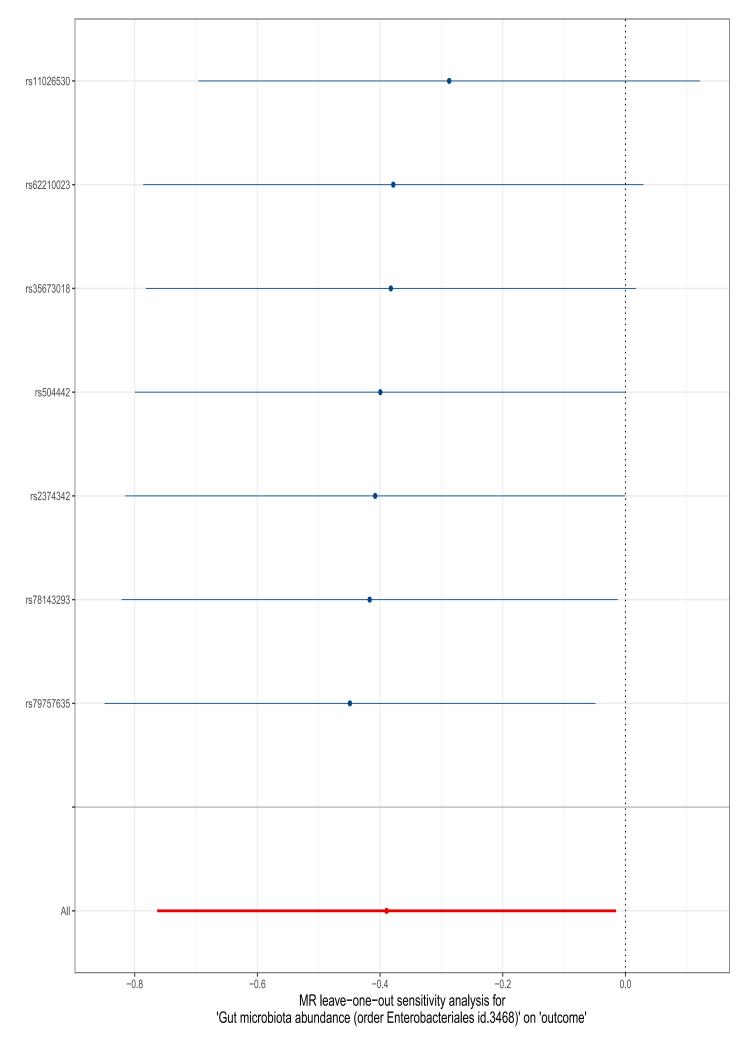


**Figure S2 Leave-one-out analysis of inflammatory protein with significant MR analysis results and fibromyalgia (preliminary analysis cohort).**


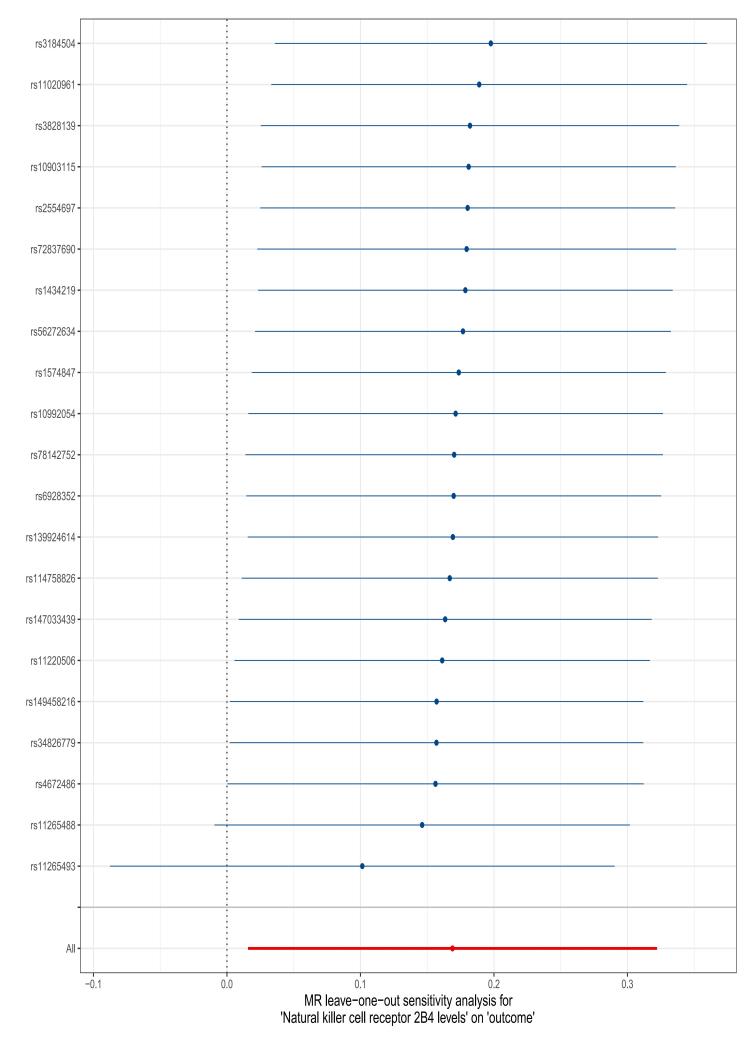

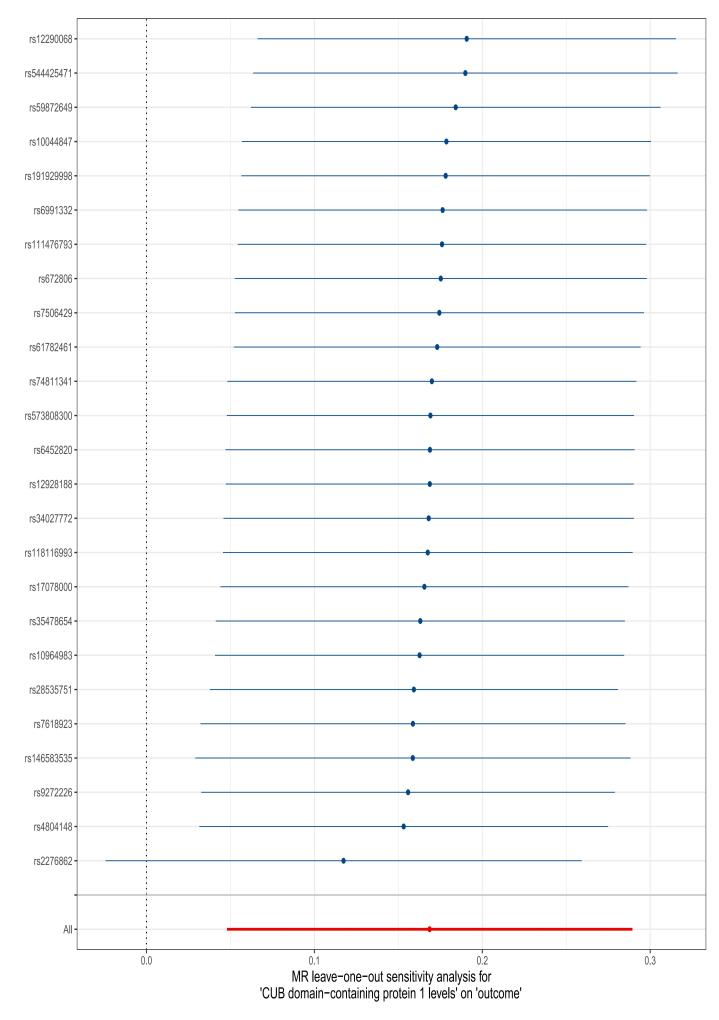


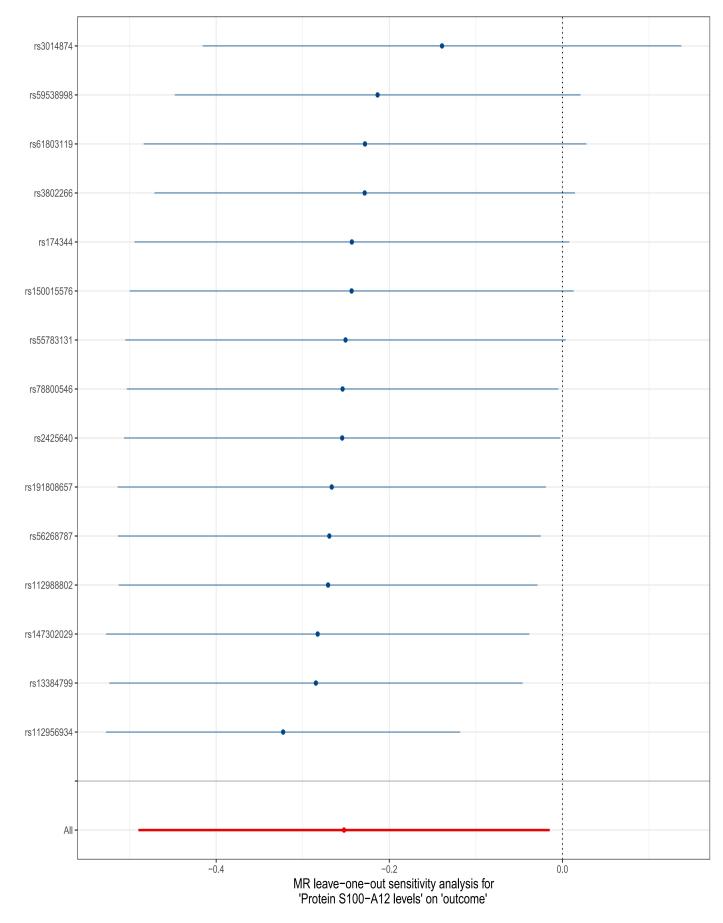

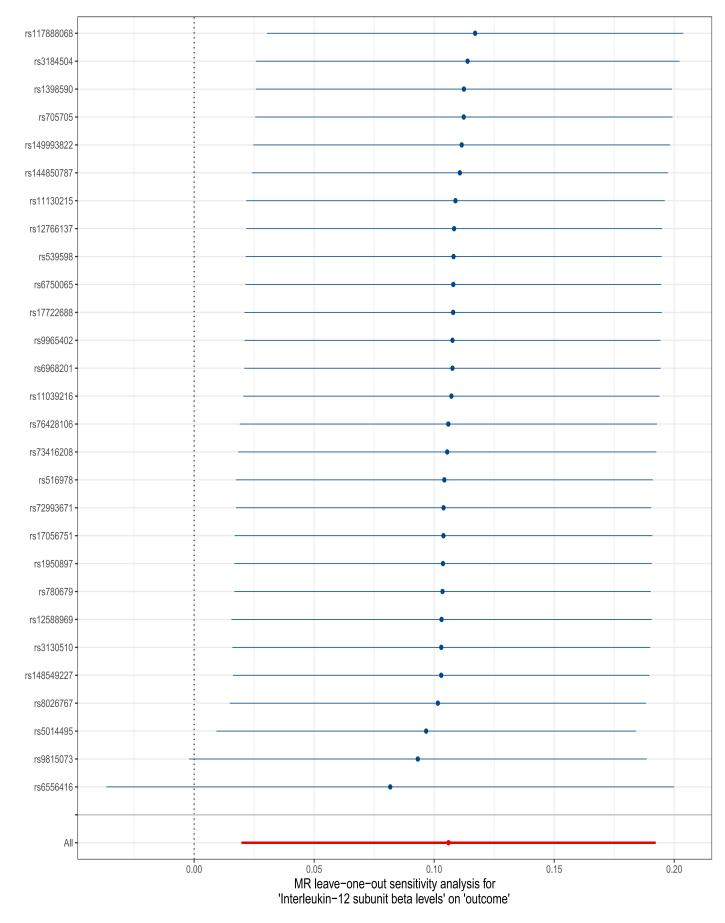


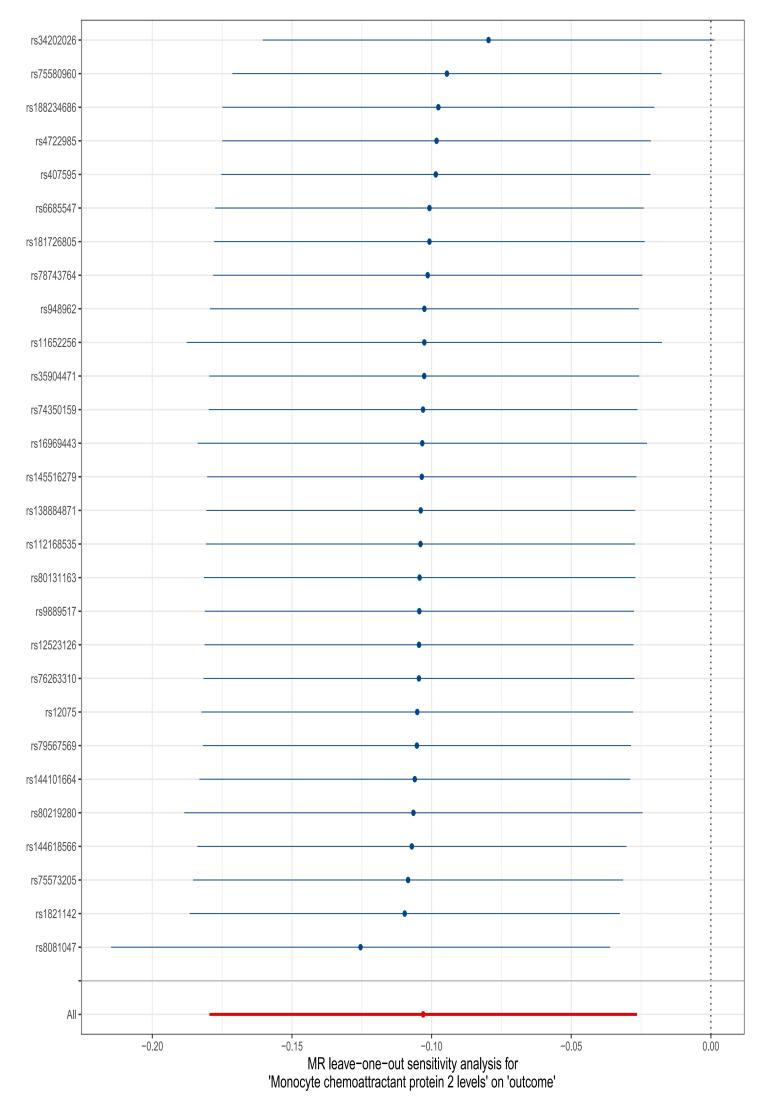

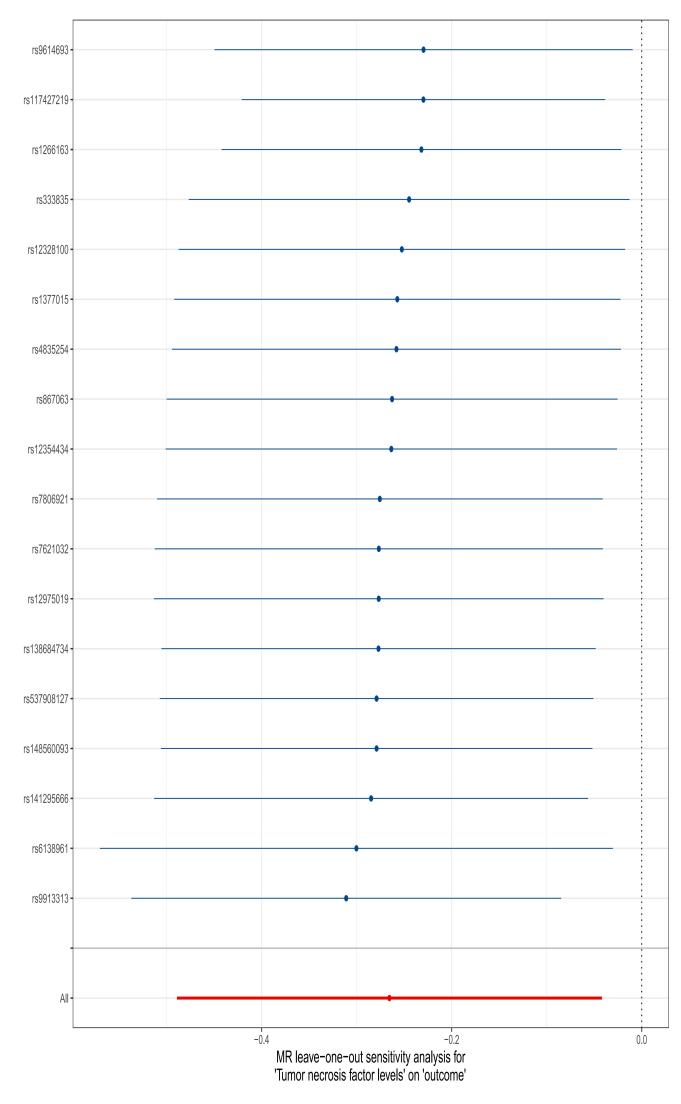

Supplement: Supplementary file 1 [file Electronic%20supplementary%20material_1.docx]
